# Supplementary material for: Machine-learning prediction of thermal expansion coefficient for perovskite oxides with experimental validation
Source: Royal Society of Chemistry journal article supplement (doi:10.1039/d3cp04017h), 2023-01-01
Supplement: d3cp04017h1.xlsx [file d3cp04017h1.xlsx]

## Sheet: Sheet1
Name	Symbol	Atomic Number	Atomic Weight	Period	Group	Families	Metal	l quantum Number	Atomic, calculated	Atomic, display*	display*	Miracle	Covalent	Ionic	van der Waals	Effective Ionic	Zunger radii sum	csd covalent	csd covalent.1	Slater	Orbital	crystal	Pauling	MB	Gordy	Mulliken	Allred-Rockow	Sanderson-1	Sanderson-2	Sanderson-3	Sanderson-4	Sanderson-5	Sanderson-6	Sanderson-7	Allred	Boyd-EdgeCombe	Ghosh-Gupta (eV)	Pearson Absolute (eV)	Nagle	Allen	Metallic Valence	# Valence Electrons	Gilmor # of valence electron	valence s	valence p	valence d	valence f	# unfilled s	# unfilled p
Hydrogen	H	1	1.00794	1	1	7	Nonmetal	0	53	37	v		37	-4	120	10	1.25	31		0.25	52.9	0.1	2.2	2.1	7.1784	7.18	2.3	2.592	N/A	N/A	N/A	N/A	N/A	N/A	2.2	N/A	7.1862	7.18	2.27	2.3	0	1	1	1	0	0	0	1	6
Helium	He	2	4.0026	1	18	9	Nonmetal	0	31	32	v		32		140		0	28		0.31	29.1	0	0	0	12.0486	0	4.16	N/A	N/A	N/A	N/A	N/A	N/A	N/A	N/A	N/A	12.0568	N/A	3.92	N/A	0	0	0	0	0	0	0	2	6
Lithium	Li	3	6.941	2	1	1	Metal	0	167	152	m	152	134	90	182	76	1.61	128		1.45	158.6	0.9	0.98	0.9	3.2223	3.01	0.912	0.886	N/A	N/A	N/A	N/A	N/A	N/A	0.98	1	2.4435	3.01	0.94	0.912	1	1	1	1	0	0	0	1	6
Beryllium	Be	4	9.01218	2	2	2	Metal	0	112	112	m	112	90	59	153	45	1.08	96		1.05	104	0.41	1.57	1.45	3.7942	4.9	1.576	1.56	1.81	N/A	N/A	N/A	N/A	N/A	1.57	1.44	3.706	4.9	1.55	1.576	2	2	2	2	0	0	0	0	6
Boron	B	5	10.811	2	13	6	Metalloid	1	87	82	v	78	82	41	180	27	0.795	84		0.85	77.6	0.25	2.04	1.9	4.5951	4.29	2.051	1.53	2.19	2.275	N/A	N/A	N/A	N/A	2.04	1.9	4.9686	4.29	2.02	2.051	3	3	3	2	1	0	0	0	5
Carbon	C	6	12.011	2	14	7	Nonmetal	1	67	77	v	77	77	40	170	16	0.64	76	76, 73, 69	0.7	62	0.29	2.55	2.37	5.6246	6.27	2.544	2.746	N/A	N/A	N/A	N/A	N/A	N/A	2.55	2.6	6.2338	6.27	2.55	2.544	4	4	4	2	2	0	0	0	4
Nitrogen	N	7	14.0067	2	15	7	Nonmetal	1	56	75	v	72	75	132	155	146	0.54	71		0.65	52.1	0.3	3.04	2.85	6.8834	7.3	3.066	3.194	N/A	N/A	N/A	N/A	N/A	N/A	3.04	3.08	7.4964	7.3	3.12	3.066	3	5	5	2	3	0	0	0	3
Oxygen	O	8	15.9994	2	16	7	Nonmetal	1	48	73	v	64	73	126	152	140	0.465	66		0.6	45	1.21	3.44	3.32	8.3703	7.54	3.61	3.654	N/A	N/A	N/A	N/A	N/A	N/A	3.44	3.62	8.7861	7.54	3.62	3.61	0	6	6	2	4	0	0	0	2
Fluorine	F	9	18.9984	2	17	8	Nonmetal	1	42	71	v	66	71	119	147	133	0.405	57		0.5	39.6	1.19	3.98	3.78	10.0854	10.41	4.193	4	N/A	N/A	N/A	N/A	N/A	N/A	3.98	4	10.0378	10.41	4.23	4.193	0	7	7	2	5	0	0	0	1
Neon	Ne	10	20.1797	2	18	9	Nonmetal	1	38	69	v		69		154	102	0	58		0.38	35.4	0	0	0	12.0317	0	4.789	4.5	N/A	N/A	N/A	N/A	N/A	4.36	N/A	N/A	11.3003	N/A	4.89	4.787	0	0	0	0	0	0	0	2	6
Sodium	Na	11	22.9898	3	1	1	Metal	0	190	186	m	180	154	116	227	72	2.65	166		1.8	171.3	1.16	0.93	0.89	2.5378	2.85	0.869	0.835	N/A	N/A	N/A	N/A	N/A	N/A	0.93	1	2.438	2.85	0.95	0.869	1	1	1	1	0	0	0	1	6
Magnesium	Mg	12	24.305	3	2	2	Metal	0	145	160	m	160	130	86	173	53.5	2.03	141		1.5	127.9	0.86	1.31	1.31	2.9745	3.75	1.293	1.318	N/A	N/A	N/A	N/A	N/A	N/A	1.31	1.32	3.6108	3.75	1.32	1.293	2	2	2	2	0	0	0	0	6
Aluminum	Al	13	26.9815	3	13	5	Metal	1	118	143	m	141	118	67.5	184	40	1.675	121		1.25	131.2	0.53	1.61	1.64	3.5237	3.23	1.613	0.84	1.63	1.714	N/A	N/A	N/A	N/A	1.61	1.58	4.6393	3.23	1.55	1.613	3	3	3	2	1	0	0	0	5
Silicon	Si	14	28.0855	3	14	6	Nonmetal	1	111	111	v	110	111	54	210	44	1.42	11	111	1.1	106.8	0.4	1.9	1.98	4.1852	4.77	1.916	2.08	N/A	1.99	2.138	N/A	N/A	N/A	1.9	1.87	5.5236	4.77	1.87	1.916	4	4	4	2	2	0	0	0	4
Phosphorus	P	15	30.9738	3	15	7	Nonmetal	1	98	106	v	102	106	58	180	184	1.24	107		1	91.9	0.31	2.19	2.32	4.9591	5.62	2.253	2.515	N/A	N/A	N/A	N/A	N/A	N/A	2.19	2.17	6.3405	5.62	2.22	2.253	3	5	5	2	3	0	0	0	3
Sulfur	S	16	32.066	3	16	7	Nonmetal	1	88	102	v	103	102	170	180	181	1.1	105		1	81	0.43	2.58	2.65	5.8458	6.22	2.589	2.957	N/A	N/A	N/A	N/A	N/A	N/A	2.58	2.64	6.8379	6.22	2.49	2.589	2	6	6	2	4	0	0	0	2
Chlorine	Cl	17	35.4527	3	17	8	Nonmetal	1	79	99	v	105	99	167	175	138	1.01	102		1	72.5	1.67	3.16	2.98	6.8446	8.3	2.869	3.475	N/A	N/A	N/A	N/A	N/A	N/A	3.16	3.05	7.2923	8.3	2.82	2.869	0	7	7	2	5	0	0	0	1
Argon	Ar	18	39.948	3	18	9	Nonmetal	1	71	97	v		97	188	188		0	106		0.71	65.9	0	0	0	7.9552	0	3.242	3.31	N/A	N/A	N/A	N/A	N/A	N/A	N/A	N/A	7.6515	N/A	3.18	3.242	0	0	0	0	0	0	0	2	6
Potassium	K	19	39.0983	4	1	1	Metal	0	243	227	m	230	196	152	275	138	3.69	203		2.2	216.2	1.52	0.82	0.8	2.7882	2.42	0.734	0.445	N/A	N/A	N/A	N/A	N/A	N/A	0.82	0.99	2.0027	2.42	0.84	0.734	1	1	1	1	0	0	0	1	6
Calcium	Ca	20	40.078	4	2	2	Metal	0	194	197	m	201	174	114	231	100	3	176		1.8	169	1.14	1	1.17	3.0128	2.2	1.034	1.13	1.95	N/A	N/A	N/A	N/A	N/A	1	1.34	2.6965	2.2	1.11	1.034	2	2	2	2	0	0	0	0	6
Scandium	Sc	21	44.9559	4	3	3	Metal	2	184	162	m	162	144	88.5	230	74.5	2.75	170		1.6	157	0.89	1.36	1.5	3.0728	3.34	1.19	N/A	0.64	1.02	N/A	N/A	N/A	N/A	1.36	N/A	2.8571	3.34	1.17	N/A	3	3	1	2	0	1	0	0	6
Titanium	Ti	22	47.88	4	4	4	Metal	2	176	147	m	142	136	100	215	86	2.58	160		1.4	147.7	0.75	1.54	1.86	3.1359	3.45	1.38	N/A	0.73	1.09	1.5	N/A	N/A	N/A	1.54	N/A	3.004	3.45	1.23	N/A	4	4	2	2	0	2	0	0	6
Vanadium	V	23	50.9415	4	5	4	Metal	2	171	134	m	134	125	93	205	79	2.43	153		1.35	140.1	0.68	1.63	2.22	3.2021	3.6	1.53	N/A	0.69	1.39	1.89	2.51	N/A	N/A	1.63	N/A	3.1482	3.6	1.27	N/A	5	5	3	2	0	3	0	0	6
Chromium	Cr	24	51.9961	4	6	4	Metal	2	166	128	m	130	127	87	200	80	2.44	139		1.4	145.3	0.76	1.66	2	3.2713	3.72	1.65	N/A	1.24	1.66	2.29	2.83	3.37	N/A	1.66	N/A	3.2951	3.72	1.29	N/A	5.78	6	4	1	0	5	0	1	6
Manganese	Mn	25	54.938	4	7	4	Metal	2	161	127	m	132	139	81	196	83	2.22	132	139, 161	1.4	127.8	0.81	1.55	2.04	3.3437	3.72	1.75	N/A	1.66	2.2	2.74	3.28	3.82	N/A	1.55	N/A	3.4349	3.72	1.36	N/A	5.78	7	5	2	0	5	0	0	6
Iron	Fe	26	55.847	4	8	4	Metal	2	156	126	m	125	125	75	N/A	78	2.11	132	132, 152	1.4	122.7	0.69	1.83	1.67	3.419	4.06	1.8	N/A	1.64	2.2	N/A	N/A	N/A	N/A	1.83	N/A	3.5836	4.06	1.4	N/A	5.78	8	5	2	0	6	0	0	6
Cobalt	Co	27	58.9332	4	9	4	Metal	2	152	125	m	125	126	79	200	74.5	2.02	126	126, 150	1.35	118.1	0.54	1.88	1.72	3.4976	4.3	1.84	N/A	1.96	2.56	3.1	N/A	N/A	N/A	1.88	N/A	3.7305	4.3	1.44	N/A	5.78	9	4	2	0	7	0	0	6
Nickel	Ni	28	58.6934	4	10	4	Metal	2	149	124	m	128	121	74	163	60	2.18	124		1.35	113.9	0.7	1.91	1.76	3.5791	4.4	1.88	N/A	1.94	2.73	3.27	3.81	N/A	N/A	1.91	N/A	3.8584	4.4	1.47	N/A	5.78	10	3	2	0	8	0	0	6
Copper	Cu	29	63.546	4	11	4	Metal	2	145	128	m	127	138	87	140	77	2.04	132		1.35	119.1	0.71	1.9	1.08	3.6637	4.48	1.85	2.03	1.98	N/A	N/A	N/A	N/A	N/A	1.9	N/A	4.0026	4.48	1.51	N/A	5.44	11	2	1	0	10	0	1	6
Zinc	Zn	30	65.39	4	12	4	Metal	2	142	134	m	140	131	88	139	74	1.88	122		1.35	106.5	0.74	1.65	1.44	3.7515	4.45	1.59	2.223	N/A	N/A	N/A	N/A	N/A	N/A	1.65	N/A	4.1332	4.45	1.46	N/A	4.44	12	1	2	0	10	0	0	6
Gallium	Ga	31	69.723	4	13	5	Metal	1	136	135	m	134	126	76	187	62	1.695	122		1.3	125.4	0.76	1.81	1.7	4.1672	3.2	1.756	0.86	N/A	2.419	N/A	N/A	N/A	N/A	1.81	1.75	4.6638	3.2	1.56	1.756	3.44	3	3	2	1	0	0	0	5
Germanium	Ge	32	72.61	4	14	6	Metalloid	1	125	122	v	114	122	87	211	73	1.56	120		1.25	109	0.53	2.01	1.99	4.6406	4.6	1.994	N/A	0.56	N/A	2.618	N/A	N/A	N/A	2.01	1.99	5.1318	4.6	1.81	1.994	4	4	4	2	2	0	0	0	4
Arsenic	As	33	74.9216	4	15	6	Metalloid	1	114	119	v	115	119	72	185	58	1.415	119		1.15	100.1	0.72	2.18	2.27	5.172	5.3	2.211	2.82	N/A	N/A	N/A	N/A	N/A	N/A	2.18	2.21	5.5372	5.3	2.11	2.211	3	5	5	2	3	0	0	0	3
Selenium	Se	34	78.96	4	16	7	Nonmetal	1	103	116	v	118	116	184	190	198	1.285	120		1.15	91.8	0.56	2.55	2.54	5.761	5.89	2.434	3.014	N/A	N/A	N/A	N/A	N/A	N/A	2.55	2.46	5.8746	5.89	2.31	2.424	2	6	6	2	4	0	0	0	2
Bromine	Br	35	79.904	4	17	8	Nonmetal	1	94	114	v	120	114	182	185	196	1.2	120		1.15	85.1	1.82	2.96	2.83	6.4079	7.59	2.685	3.219	N/A	N/A	N/A	N/A	N/A	N/A	2.96	2.75	6.1658	7.59	2.56	2.685	0	7	7	2	5	0	0	0	1
Krypton	Kr	36	83.8	4	18	9	Nonmetal	1	88	110	v		110	166	202		0	116		0.88	79.5		3		7.1127		2.966	2.91	N/A	N/A	N/A	N/A	N/A	N/A	N/A	N/A	6.3916	N/A	2.82	2.966	0	0	0	0	0	0	0	2	6
Rubidium	Rb	37	85.4678	5	1	1	Metal	0	265	248	m	244	211	166	290	152	4.1	220		2.35	228.7	1.66	0.82	0.8	3.1886	2.34	0.706	0.312	N/A	N/A	N/A	N/A	N/A	N/A	0.82	N/A	2.0135	2.34	0.83	0.706	1	1	1	1	0	0	0	1	6
Strontium	Sr	38	87.62	5	2	2	Metal	0	219	215	m	212	192	132	255	118	3.21	195		2	183.6	1.32	0.95	1.13	3.3588	2	0.963	0.721	N/A	N/A	N/A	N/A	N/A	N/A	0.95	N/A	2.5849	2	1.06	0.963	2	2	2	2	0	0	0	0	6
Yttrium	Y	39	88.9059	5	3	3	Metal	2	212	180	m	179	162	104	240	90	2.94	190		1.85	169.3	1.04	1.22	1.41	3.4043	3.19	1.12	N/A	0.4	0.65	N/A	N/A	N/A	N/A	1.22	N/A	2.7237	3.19	1.11	N/A	3	3	1	2	0	1	0	0	6
Zirconium	Zr	40	91.224	5	4	4	Metal	2	206	160	m	158	148	86	N/A	72	2.825	175		1.55	159.3	0.86	1.33	1.7	3.4521	3.64	1.32	N/A	0.52	0.79	0.9	N/A	N/A	N/A	1.33	N/A	2.8489	3.64	1.17	N/A	4	4	2	2	0	2	0	0	6
Niobium	Nb	41	92.9064	5	5	4	Metal	2	198	146	m	143	137	86	215	72	2.76	164		1.45	158.9	0.78	1.6	2.03	3.5023	4	1.41	N/A	0.77	1.02	1.25	1.42	N/A	N/A	1.83	N/A	2.974	4	1.21	N/A	5	5	3	1	0	4	0	1	6
Molybdenum	Mo	42	95.94	5	6	4	Metal	2	190	139	m	139	145	83	N/A	69	2.72	154		1.45	152	0.79	2.16	1.94	3.5548	3.9	1.47	N/A	0.9	1.15	1.4	1.73	2.2	N/A	2.16	N/A	3.0992	3.9	1.26	N/A	5.78	6	4	1	0	5	0	1	6
Technetium	Tc	43	97.9072	5	7	4	Metal	2	183	136	m	136	156	78.5	205	64.5	2.65	147		1.35	139.1	0.79	1.9	2.18	3.6096	4	1.51	N/A	N/A	N/A	N/A	N/A	N/A	N/A	2.12	N/A	3.2244	N/A	1.3	N/A	5.78	7	5	2	0	5	0	0	6
Ruthenium	Ru	44	101.07	5	8	4	Metal	2	178	134	m	134	126	82	205	68	2.605	146		1.3	141	0.82	2.2	1.97	3.6668	4.5	1.54	N/A	N/A	N/A	N/A	N/A	N/A	N/A	2.15	N/A	3.336	4.5	1.35	N/A	5.78	8	5	1	0	7	0	1	6
Rhodium	Rh	45	102.906	5	9	4	Metal	2	173	134	m	132	135	80.5	200	66.5	2.52	142		1.35	136.4	0.81	2.28	1.99	3.7262	4.3	1.56	N/A	N/A	N/A	N/A	N/A	N/A	N/A	2.28	N/A	3.4611	4.3	1.39	N/A	5.78	9	4	1	0	8	0	1	6
Palladium	Pd	46	106.42	5	10	4	Metal	2	169	137	m	142	131	73	163	59	2.45	139		1.4	56.7	0.78	2.2	2.08	3.788	4.45	1.59	N/A	N/A	N/A	N/A	N/A	N/A	N/A	2.2	N/A	3.5727	4.45	1.61	N/A	5.78	10	3	0	0	10	0	2	6
Silver	Ag	47	107.868	5	11	4	Metal	0	165	144	m	144	153	129	172	115	2.375	145		1.6	128.6	1.29	1.93	1.07	3.8522	4.44	1.87	1.826	N/A	N/A	N/A	N/A	N/A	N/A	1.93	N/A	3.6842	4.44	1.45	N/A	5.44	11	2	1	0	10	0	1	6
Cadmium	Cd	48	112.411	5	12	4	Metal	0	161	151	m	157	148	109	158	95	2.215	144		1.55	118.4	0.92	1.69	1.4	3.9187	4.33	1.52	1.98	N/A	N/A	N/A	N/A	N/A	N/A	1.69	N/A	3.7958	4.33	1.45	N/A	4.44	12	1	2	0	10	0	0	6
Indium	In	49	114.818	5	13	5	Metal	1	156	167	m	155	144	94	193	80	2.05	142		1.55	138.2	0.94	1.78	1.63	4.2337	3.1	1.656	0.71	N/A	2.138	N/A	N/A	N/A	N/A	1.78	N/A	4.253	3.1	1.52	1.656	3.44	3	3	2	1	10	0	0	5
Tin	Sn	50	118.71	5	14	5	Metal	1	145	141	v	155	141	83	217	69	1.88	139		1.45	124	0.69	1.96	1.88	4.5926	4.3	1.824	N/A	1.49	N/A	2.298	N/A	N/A	N/A	1.96	N/A	4.672	4.3	1.7	1.824	4	4	4	2	2	10	0	0	4
Antimony	Sb	51	121.76	5	15	6	Nonmetal	1	133	138	v	155	138	90	206	76	1.765	139		1.45	119.3	0.9	2.05	2.14	4.9953	4.85	1.984	2.458	N/A	N/A	N/A	N/A	N/A	N/A	2.05	N/A	5.0203	4.85	1.88	1.984	3	5	5	2	3	10	0	0	3
Tellurium	Te	52	127.6	5	16	6	Nonmetal	1	123	135	v	140	135	207	206	221	1.67	138		1.4	111.1	1.11	2.1	2.38	5.4418	5.49	2.158	2.618	N/A	N/A	N/A	N/A	N/A	N/A	2.52	N/A	5.325	5.49	2.08	2.158	2	6	6	2	4	10	0	0	2
Iodine	I	53	126.904	5	17	8	Nonmetal	1	115	133	v	160	133	206	198	220	1.585	139		1.4	104.4	2.06	2.66	2.76	5.9319	6.76	2.359	2.778	N/A	N/A	N/A	N/A	N/A	N/A	2.66	N/A	5.5916	6.76	2.27	2.359	0	7	7	2	5	10	0	0	1
Xenon	Xe	54	131.29	5	18	9	Nonmetal	1	108	130	v		130	62	216		0	140		1.08	98.6	0.62	2.6	0	6.4662		2.582	2.34	N/A	N/A	N/A	N/A	N/A	N/A	N/A	N/A	5.8121	N/A	2.45	2.582	0	0	0	0	0	0	0	2	6
Cesium	Cs	55	132.905	6	1	1	Metal	0	298	265	m	264	225	181	343	167	4.31	244		2.6	251.8	1.81	0.79	0.77	4.4326	2.18	0.659	0.22	N/A	N/A	N/A	N/A	N/A	N/A	0.79	N/A	N/A	2.18	0.79	N/A	1	1	1	1	0	0	0	1	6
Barium	Ba	56	137.327	6	2	2	Metal	0	253	222	m	223	198	149	268	135	3.402	215		2.15	206	1.49	0.89	1.08	4.4699	2.4	0.881	0.683	N/A	N/A	N/A	N/A	N/A	N/A	0.89	N/A	N/A	2.4	0.98	N/A	2	2	2	2	0	0	0	0	6
Lanthanum	La	57	138.905	6	3	3	Metal	2	195	187	m	187	169	117.2	250	103.2	3.08	207		1.95	191.5	1.36	1.1	1.35	4.5168	3.1	1.09	N/A	N/A	N/A	N/A	N/A	N/A	N/A	1.1	N/A	N/A	3.1	1.04	N/A	3	3	1	2	0	1	0	0	6
Cerium	Ce	58	140.115	6	3	3	Metal	3	185	182	m	182	165	115	248	101	4.5	204		1.85	197.8	1.15	1.12	1.1	4.5734	3.1	1.09	N/A	N/A	N/A	N/A	N/A	N/A	N/A	1.12	N/A	N/A	N/A	1.05	N/A	3.2	3	3	2	0	1	1	0	6
Praseodymium	Pr	59	140.908	6	3	3	Metal	3	247	182	m	183	165	113	247	99	4.48	203		1.85	194.2	1.32	1.13	1.1	4.6395	3.1	1.09	N/A	N/A	N/A	N/A	N/A	N/A	N/A	1.13	N/A	N/A	N/A	1.06	N/A	3.1	3	3	2	0	0	3	0	6
Neodymium	Nd	60	144.24	6	3	3	Metal	3	206	181	m	182	184	143	229	129	3.99	201		1.85	191.2	1.3	1.14	1.2	4.7152	3.1	1.09	N/A	N/A	N/A	N/A	N/A	N/A	N/A	1.14	N/A	N/A	N/A	1.03	N/A	3.1	3	3	2	0	0	4	0	6
Promethium	Pm	61	144.913	6	3	3	Metal	3	205	183	m	185	163	111	243	97	3.99	199		1.85	188.2	1.28	1.13	1.15	4.8006	3.1	1.09	N/A	N/A	N/A	N/A	N/A	N/A	N/A	1.16	N/A	N/A	N/A	1.04	N/A	3	3	3	2	0	0	5	0	6
Samarium	Sm	62	150.36	6	3	3	Metal	3	238	180	m	185	162	136	242	122	4.14	198		1.85	185.4	1.1	1.17	1.2	4.8955	3.1	1.09	N/A	N/A	N/A	N/A	N/A	N/A	N/A	1.17	N/A	N/A	N/A	1.05	N/A	2.8	3	3	2	0	0	6	0	6
Europium	Eu	63	151.965	6	3	3	Metal	3	231	180	m	196	185	131	240	117	3.94	198		1.85	182.6	1.31	1.2	1.15	5.0001	3.1	1.09	N/A	N/A	N/A	N/A	N/A	N/A	N/A	1.18	N/A	N/A	N/A	1.06	N/A	2	3	3	2	0	0	7	0	6
Gadolinium	Gd	64	157.25	6	3	3	Metal	3	233	180	m	176	161	107.8	238	93.5	3.91	196		1.8	171.3	1.08	1.2	1.1	5.1142	3.1	1.09	N/A	N/A	N/A	N/A	N/A	N/A	N/A	1.2	N/A	N/A	N/A	1.1	N/A	3	3	3	2	0	1	7	0	6
Terbium	Tb	65	158.925	6	3	3	Metal	3	225	177	m	176	159	106.3	237	92.3	3.89	194		1.75	177.5	1.18	1.2	1.2	5.238	3.1	1.09	N/A	N/A	N/A	N/A	N/A	N/A	N/A	1.21	N/A	N/A	N/A	1.08	N/A	3	3	3	2	0	0	9	0	6
Dysprosium	Dy	66	162.5	6	3	3	Metal	3	228	178	m	175	159	105.2	235	107	3.67	192		1.75	175	1.05	1.22	1.15	5.3714	3.1	1.09	N/A	N/A	N/A	N/A	N/A	N/A	N/A	1.22	N/A	N/A	N/A	1.09	N/A	3	3	3	2	0	0	10	0	6
Holmium	Ho	67	164.93	6	3	3	Metal	3	226	176	m	177	158	104.1	233	90.1	3.65	192		1.75	172.7	1.04	1.23	1.2	5.5143	3.1	1.09	N/A	N/A	N/A	N/A	N/A	N/A	N/A	1.23	N/A	N/A	N/A	1.1	N/A	3	3	3	2	0	0	11	0	6
Erbium	Er	68	167.26	6	3	3	Metal	3	226	176	m	175	157	103	232	89	3.63	189		1.75	170.3	1.03	1.24	1.2	5.6669	3.1	1.09	N/A	N/A	N/A	N/A	N/A	N/A	N/A	1.24	N/A	N/A	N/A	1.11	N/A	3	3	3	2	0	0	12	0	6
Thulium	Tm	69	168.934	6	3	3	Metal	3	222	176	m	175	156	117	230	103	3.6	190		1.75	168.1	1.02	1.25	1.2	5.8291	3.1	1.09	N/A	N/A	N/A	N/A	N/A	N/A	N/A	1.25	N/A	N/A	N/A	1.12	N/A	3	3	3	2	0	0	13	0	6
Ytterbium	Yb	70	173.04	6	3	3	Metal	3	222	176	m	190	156	116	228	102	3.59	197	187	1.75	165.8	1.13	1.1	1.1	6.0009	3.1	1.09	N/A	N/A	N/A	N/A	N/A	N/A	N/A	1.26	N/A	N/A	N/A	1.13	N/A	2	3	3	2	0	0	14	0	6
Lutetium	Lu	71	174.967	6	3	3	Metal	2	217	174	m	175	160	100.1	227	86.1	3.37	187		1.75	155.3	1	1.27	1.2	6.1824	3.1	1.09	N/A	N/A	N/A	N/A	N/A	N/A	N/A	1.27	N/A	N/A	N/A	1.12	N/A	3	3	3	2	0	1	14	0	6
Hafnium	Hf	72	178.49	6	4	4	Metal	2	208	159	m	158	150	85	225	71	2.91	175		1.55	147.6	0.85	1.3	1.73	6.3704	3.8	1.16	N/A	N/A	N/A	N/A	N/A	N/A	N/A	1.39	N/A	N/A	3.8	1.2	N/A	4	4	2	2	0	2	14	0	6
Tantalum	Ta	73	180.948	6	5	4	Metal	2	200	146	m	145	138	86	220	72	2.79	170		1.45	141.3	0.78	1.5	1.94	6.5738	4.11	1.34	N/A	N/A	N/A	N/A	N/A	N/A	N/A	1.79	N/A	N/A	4.11	1.26	N/A	5	5	3	2	0	3	14	0	6
Tungsten	W	74	183.84	6	6	4	Metal	2	193	139	m	135	146	80	210	66	2.735	162		1.35	136	0.74	2.36	1.79	6.7841	4.4	1.47	N/A	0.73	0.98	1.23	1.48	1.67	N/A	2.36	N/A	N/A	4.4	1.31	N/A	5.78	6	4	2	0	4	14	0	6
Rhenium	Re	75	186.207	6	7	4	Metal	2	188	137	m	137	159	77	205	63	2.68	151		1.35	131	0.77	1.9	2.06	7.004	4.02	1.6	N/A	N/A	N/A	N/A	N/A	N/A	N/A	2.83	N/A	N/A	4.02	1.35	N/A	5.78	7	5	2	0	5	14	0	6
Osmium	Os	76	190.23	6	8	4	Metal	2	185	135	m	135	128	77	200	63	2.65	144		1.3	126.6	0.77	2.2	1.85	7.2335	4.9	1.65	N/A	N/A	N/A	N/A	N/A	N/A	N/A	2.78	N/A	N/A	4.9	1.39	N/A	5.78	8	5	2	0	6	14	0	6
Iridium	Ir	77	192.22	6	9	4	Metal	2	180	136	m	136	137	82	200	68	2.628	141		1.35	122.7	0.77	2.2	1.87	7.4345	5.4	1.68	N/A	N/A	N/A	N/A	N/A	N/A	N/A	2.2	N/A	N/A	5.4	1.43	N/A	5.78	9	4	2	0	7	14	0	6
Platinum	Pt	78	195.08	6	10	4	Metal	2	177	139	m	139	128	94	175	80	2.7	136		1.35	122.1	0.74	2.28	1.91	7.7208	5.6	1.72	N/A	N/A	N/A	N/A	N/A	N/A	N/A	2.28	N/A	N/A	5.6	1.49	N/A	5.78	10	3	1	0	9	14	1	6
Gold	Au	79	196.967	6	11	4	Metal	2	174	144	m	143	144	151	166	137	2.66	136		1.35	118.7	1.51	2.54	1.19	7.9791	5.77	1.92	N/A	N/A	N/A	N/A	N/A	N/A	N/A	2.54	N/A	N/A	5.77	1.53	N/A	5.44	11	2	1	0	10	14	1	6
Mercury	Hg	80	200.59	6	12	4	Metal	2	171	151	m	152	149	133	155	119	2.41	132		1.5	112.6	0.83	2	1.49	8.2469	4.91	1.76	2.195	N/A	N/A	N/A	N/A	N/A	N/A	2	N/A	N/A	4.91	1.54	N/A	4.44	12	1	2	0	10	14	0	6
Thallium	Tl	81	204.383	6	13	5	Metal	1	156	170	m	172	148	164	196	150	2.235	145		1.9	131.9	1.03	1.62	1.69	4.6618	3.2	1.789	0.99	N/A	2.246	N/A	N/A	N/A	N/A	2.04	N/A	N/A	3.2	1.59	N/A	3.44	3	3	2	1	10	14	0	5
Lead	Pb	82	207.2	6	14	5	Metal	1	154	175	m	174	147	133	202	119	2.09	146		1.8	121.5	1.49	1.87	1.92	4.7404	3.9	1.854	N/A	1.92	N/A	2.291	N/A	N/A	N/A	2.33	N/A	N/A	3.9	1.76	N/A	2.44	4	4	2	2	10	14	0	4
Bismuth	Bi	83	208.98	6	15	5	Metal	1	143	146	v	162	146	117	230	103	1.997	148		1.6	129.5	1.17	2.02	2.14	4.8288	4.69	2.01	2.342	N/A	N/A	N/A	N/A	N/A	N/A	2.02	N/A	N/A	4.69	1.83	N/A	3	5	5	2	3	10	14	0	3
Polonium	Po	84	209	6	16				135	N/A			140		197		1.9	140			121.2		2					N/A	N/A	N/A	N/A	N/A	N/A	N/A	N/A	N/A	N/A	N/A	1.96	N/A
Astatine	At	85	210	6	17				127	N/A			150		202		1.83	150			114.6		2.2					N/A	N/A	N/A	N/A	N/A	N/A	N/A	N/A	N/A	N/A	N/A	2.12	N/A
Radon	Rn	86	222	6	18				120	145	v		145		220		0	150			109		N/A					N/A	N/A	N/A	N/A	N/A	N/A	N/A	N/A	N/A	N/A	N/A	2.27	N/A
Francium	Fr	87	223	7	1				N/A	N/A			260		348		4.37	260			244.7		0.7					N/A	N/A	N/A	N/A	N/A	N/A	N/A	N/A	N/A	N/A	N/A	0.82	N/A
Radium	Ra	88	226	7	2				N/A	N/A			221		283		3.53	221			204.2		0.9					N/A	N/A	N/A	N/A	N/A	N/A	N/A	N/A	N/A	N/A	N/A	0.99	N/A
Actinium	Ac	89	227	7					N/A	N/A			215		N/A		3.12	215			189.5		1.1					N/A	N/A	N/A	N/A	N/A	N/A	N/A	N/A	N/A	N/A	N/A	1.03	N/A
Thorium	Th	90	232.038	7	3	3	1	2	180	179	m	178	206	108	240	94	4.98	206		1.8	178.8	1.19	1.3	1.3	2.8784	3.2	1.11	N/A	N/A	N/A	N/A	N/A	N/A	N/A	N/A	N/A	N/A	N/A	1.03	N/A	4	2	2	2	0	2	0	0	6
Protactinium	Pa	91	231.036	7					180	163	m	163	200		N/A		4.96	200			180.4		1.5					N/A	N/A	N/A	N/A	N/A	N/A	N/A	N/A	N/A	N/A	N/A	1.08	N/A
Uranium	U	92	238.029	7	3	3	1	3	175	156	m	158	196	116.5	186	102.5	4.72	196		1.75	177.5	0.87	1.38	1.7	3.3168	3.4	1.22	N/A	N/A	N/A	N/A	N/A	N/A	N/A	1.38	N/A	N/A	N/A	1.06	N/A	5.78	3	3	2	0	1	3	0	6
Neptunium	Np	93	237	7					175	155	m	155	190		N/A		4.93	190			174.1		1.36					N/A	N/A	N/A	N/A	N/A	N/A	N/A	1.36	N/A	N/A	N/A	1.09	N/A
Plutonium	Pu	94	244	7					175	159	m	159	187		N/A		4.91	187			178.4		1.28					N/A	N/A	N/A	N/A	N/A	N/A	N/A	1.28	N/A	N/A	N/A	1.09	N/A
Americium	Am	95	243	7					175	173	m	173	180		N/A		4.89	180			175.7		1.3					N/A	N/A	N/A	N/A	N/A	N/A	N/A	N/A	N/A	N/A	N/A	1.1	N/A
Curium	Cm	96	247	7					N/A	174	m	174	169		N/A		N/A	169			165.7		1.3					N/A	N/A	N/A	N/A	N/A	N/A	N/A	N/A	N/A	N/A	N/A	1.11	N/A
Berkelium	Bk	97	247	7					N/A	170	m	170	N/A		N/A		N/A	N/A			162.6		1.3					N/A	N/A	N/A	N/A	N/A	N/A	N/A	N/A	N/A	N/A	N/A	1.11	N/A
Californium	Cf	98	251	7					N/A	N/A	N/A	N/A	N/A		N/A		N/A	N/A			159.8		1.3					N/A	N/A	N/A	N/A	N/A	N/A	N/A	N/A	N/A	N/A	N/A	1.13	N/A
Einsteinium	Es	99	252	7					N/A	N/A	N/A	N/A	N/A		N/A		N/A	N/A			157.6		1.3					N/A	N/A	N/A	N/A	N/A	N/A	N/A	N/A	N/A	N/A	N/A	1.14	N/A
Fermium	Fm	100	257	7					N/A	N/A	N/A	N/A	N/A		N/A		N/A	N/A			155.7		1.3					N/A	N/A	N/A	N/A	N/A	N/A	N/A	N/A	N/A	N/A	N/A	1.1	N/A
Mendelevium	Md	101	258	7					N/A	N/A	N/A	N/A	N/A		N/A		N/A	N/A			152.7		1.3					N/A	N/A	N/A	N/A	N/A	N/A	N/A	N/A	N/A	N/A	N/A	1.17	N/A
Nobelium	No	102	259	7					N/A	N/A	N/A	N/A	N/A		N/A		N/A	N/A			158.1		1.3					N/A	N/A	N/A	N/A	N/A	N/A	N/A	N/A	N/A	N/A	N/A	1.18	N/A
Lawrencium	Lr	103	262	7	3				N/A	N/A	N/A	N/A	N/A		N/A		N/A	N/A			N/A		N/A					N/A	N/A	N/A	N/A	N/A	N/A	N/A	N/A	N/A	N/A	N/A	N/A	N/A
Rutherfordium	Rf	104	267	7	4				N/A	N/A	N/A	N/A	N/A		N/A		N/A	N/A			N/A		N/A					N/A	N/A	N/A	N/A	N/A	N/A	N/A	N/A	N/A	N/A	N/A	N/A	N/A
Dubnium	Db	105	270	7	5				N/A	N/A	N/A	N/A	N/A		N/A		N/A	N/A			N/A		N/A					N/A	N/A	N/A	N/A	N/A	N/A	N/A	N/A	N/A	N/A	N/A	N/A	N/A
Seaborgium	Sg	106	269	7	6				N/A	N/A	N/A	N/A	N/A		N/A		N/A	N/A			N/A		N/A					N/A	N/A	N/A	N/A	N/A	N/A	N/A	N/A	N/A	N/A	N/A	N/A	N/A
Bohrium	Bh	107	270	7	7				N/A	N/A	N/A	N/A	N/A		N/A		N/A	N/A			N/A		N/A					N/A	N/A	N/A	N/A	N/A	N/A	N/A	N/A	N/A	N/A	N/A	N/A	N/A
Hassium	Hs	108	270	7	8				N/A	N/A	N/A	N/A	N/A		N/A		N/A	N/A			N/A		N/A					N/A	N/A	N/A	N/A	N/A	N/A	N/A	N/A	N/A	N/A	N/A	N/A	N/A
Meitnerium	Mt	109	278	7	9				N/A	N/A	N/A	N/A	N/A		N/A		N/A	N/A			N/A		N/A					N/A	N/A	N/A	N/A	N/A	N/A	N/A	N/A	N/A	N/A	N/A	N/A	N/A
Darmstadtium	Ds	110	281	7	10				N/A	N/A	N/A	N/A	N/A		N/A		N/A	N/A			N/A		N/A					N/A	N/A	N/A	N/A	N/A	N/A	N/A	N/A	N/A	N/A	N/A	N/A	N/A
Roentgenium	Rg	111	281	7	11				N/A	N/A	N/A	N/A	N/A		N/A		N/A	N/A			N/A		N/A					N/A	N/A	N/A	N/A	N/A	N/A	N/A	N/A	N/A	N/A	N/A	N/A	N/A
Copernicium	Cn	112	285	7	12				N/A	N/A	N/A	N/A	N/A		N/A		N/A	N/A			N/A		N/A					N/A	N/A	N/A	N/A	N/A	N/A	N/A	N/A	N/A	N/A	N/A	N/A	N/A
Nihonium	Nh	113	286	7	13				N/A	N/A	N/A	N/A	N/A		N/A		N/A	N/A			N/A		N/A					N/A	N/A	N/A	N/A	N/A	N/A	N/A	N/A	N/A	N/A	N/A	N/A	N/A
Flerovium	Fl	114	289	7	14				N/A	N/A	N/A	N/A	N/A		N/A		N/A	N/A			N/A		N/A					N/A	N/A	N/A	N/A	N/A	N/A	N/A	N/A	N/A	N/A	N/A	N/A	N/A
Moscovium	Mc	115	289	7	15				N/A	N/A	N/A	N/A	N/A		N/A		N/A	N/A			N/A		N/A					N/A	N/A	N/A	N/A	N/A	N/A	N/A	N/A	N/A	N/A	N/A	N/A	N/A
Livermorium	Lv	116	293	7	16				N/A	N/A	N/A	N/A	N/A		N/A		N/A	N/A			N/A		N/A					N/A	N/A	N/A	N/A	N/A	N/A	N/A	N/A	N/A	N/A	N/A	N/A	N/A
Tennessine	Ts	117	293	7	17				N/A	N/A	N/A	N/A	N/A		N/A		N/A	N/A			N/A		N/A					N/A	N/A	N/A	N/A	N/A	N/A	N/A	N/A	N/A	N/A	N/A	N/A	N/A
Oganesson	Og	118	294	7	18				N/A	N/A	N/A	N/A	N/A		N/A		N/A	N/A			N/A		N/A					N/A	N/A	N/A	N/A	N/A	N/A	N/A	N/A	N/A	N/A	N/A	N/A	N/A
[truncated: 71 more columns]
