# Supplementary material for: Machine-learning prediction of thermal expansion coefficient for perovskite oxides with experimental validation
Source: Royal Society of Chemistry journal article supplement (doi:10.1039/d3cp04017h), 2023-01-01
Supplement: d3cp04017h2.pdf [file d3cp04017h2.pdf]

## Supplementary Information

### Machine-learning prediction of thermal expansion coefficient for perovskite oxides with experimental validation

Kevin P. McGuinness<sup>1</sup>, Anton O. Oliynyk<sup>2</sup>, Sangjoon Lee<sup>3</sup>, Beatriz Molero-Sanchez<sup>1</sup>, Paul Kwesi Addo\*<sup>1</sup>

<sup>1</sup> SeeO2 Energy Inc, 3655 36 St NW, Calgary, AB T2L 1Y8, Canada

<sup>2</sup> Department of Chemistry and Biochemistry, Manhattan College, Riverdale, NY, 10741, United States

<sup>3</sup> Department of Chemical Engineering, The Cooper Union for the Advancement of Science and Art, New York, NY, 10003, United States

\* Correspondence: founders@seeo2energy.com

SeeO2 Energy Inc.

3655 36 St NW, Calgary, AB, T2L 1Y8, Canada

| Composition              | TEC (x10 <sup>-6</sup> K <sup>-1</sup> ) | Initial Temperature (°C) | Final Temperature (°C) | Reference                                                                                                   |
|--------------------------|------------------------------------------|--------------------------|------------------------|-------------------------------------------------------------------------------------------------------------|
| La0.6Sr0.4Fe0.8Cu0.2O3   | 14.6                                     | 25                       | 800                    | <a href="https://doi.org/10.1016/j.ijhydene.2012.05.114">https://doi.org/10.1016/j.ijhydene.2012.05.114</a> |
| La0.8Sr0.2Mn0.75Co0.25O3 | 13                                       | 30                       | 1000                   | <a href="https://doi.org/10.1016/j.ssi.2005.12.017">https://doi.org/10.1016/j.ssi.2005.12.017</a>           |
| La0.8Sr0.2Mn0.5Co0.5O3   | 15.6                                     | 30                       | 1000                   | <a href="https://doi.org/10.1016/j.ssi.2005.12.017">https://doi.org/10.1016/j.ssi.2005.12.017</a>           |
| La0.8Sr0.2Mn0.25Co0.75O3 | 17.5                                     | 30                       | 1000                   | <a href="https://doi.org/10.1016/j.ssi.2005.12.017">https://doi.org/10.1016/j.ssi.2005.12.017</a>           |
| La0.8Sr0.2Fe0.75Co0.25O3 | 15.6                                     | 30                       | 1000                   | <a href="https://doi.org/10.1016/j.ssi.2005.12.017">https://doi.org/10.1016/j.ssi.2005.12.017</a>           |
| La0.8Sr0.2Fe0.5Co0.5O3   | 18.3                                     | 30                       | 1000                   | <a href="https://doi.org/10.1016/j.ssi.2005.12.017">https://doi.org/10.1016/j.ssi.2005.12.017</a>           |
| La0.8Sr0.2Fe0.25Co0.75O3 | 19.1                                     | 30                       | 1000                   | <a href="https://doi.org/10.1016/j.ssi.2005.12.017">https://doi.org/10.1016/j.ssi.2005.12.017</a>           |
| La0.8Sr0.2Mn0.5Fe0.5O3   | 10.9                                     | 30                       | 1000                   | <a href="https://doi.org/10.1016/j.ssi.2005.12.017">https://doi.org/10.1016/j.ssi.2005.12.017</a>           |
| La0.7Sr0.3Fe0.8Ni0.2O3   | 13.7                                     | 30                       | 1000                   | <a href="https://doi.org/10.1149/1.1483156">https://doi.org/10.1149/1.1483156</a>                           |
| La0.6Sr0.4Co0.8Mn0.2O3   | 18.1                                     | 500                      | 900                    | <a href="https://doi.org/10.1016/S0025-5408(03)00143-0">https://doi.org/10.1016/S0025-5408(03)00143-0</a>   |
| La0.6Sr0.4Co0.8Mn0.2O3   | 18.1                                     | 500                      | 900                    | <a href="https://doi.org/10.1016/S0025-5408(03)00143-0">https://doi.org/10.1016/S0025-5408(03)00143-0</a>   |
| Gd0.6Sr0.4Co0.8Mn0.2O3   | 21.3                                     | 500                      | 900                    | <a href="https://doi.org/10.1016/S0025-5408(03)00143-0">https://doi.org/10.1016/S0025-5408(03)00143-0</a>   |
| Sm0.6Sr0.4Co0.8Mn0.2O3   | 21.6                                     | 500                      | 900                    | <a href="https://doi.org/10.1016/S0025-5408(03)00143-0">https://doi.org/10.1016/S0025-5408(03)00143-0</a>   |
| Nd0.6Sr0.4Co0.8Mn0.2O3   | 19.6                                     | 500                      | 900                    | <a href="https://doi.org/10.1016/S0025-5408(03)00143-0">https://doi.org/10.1016/S0025-5408(03)00143-0</a>   |
| La0.6Sr0.4Co0.2Fe0.8O3   | 15.3                                     | 200                      | 600                    | <a href="https://doi.org/10.1016/j.ssi.2012.01.001">https://doi.org/10.1016/j.ssi.2012.01.001</a>           |
| La0.8Sr0.2Co0.2Fe0.8O3   | 14.8                                     | 30                       | 1000                   | <a href="https://doi.org/10.1016/S0167-2738(00)00770-0">https://doi.org/10.1016/S0167-2738(00)00770-0</a>   |
| La0.8Sr0.2Co0.8Fe0.2O3   | 19.3                                     | 30                       | 1000                   | <a href="https://doi.org/10.1016/S0167-2738(00)00770-0">https://doi.org/10.1016/S0167-2738(00)00770-0</a>   |
| La0.6Sr0.4Co0.9Cu0.1O3   | 19.2                                     | 30                       | 900                    | <a href="https://doi.org/10.1016/S0167-2738(02)00115-7">https://doi.org/10.1016/S0167-2738(02)00115-7</a>   |

|                                                                                          |       |     |      |                                                                                                                     |
|------------------------------------------------------------------------------------------|-------|-----|------|---------------------------------------------------------------------------------------------------------------------|
| Pr <sub>0.8</sub> Sr <sub>0.2</sub> Co <sub>0.2</sub> Fe <sub>0.8</sub> O <sub>3</sub>   | 12.8  | 30  | 1000 | <a href="https://doi.org/10.1016/S0167-2738(00)00770-0">https://doi.org/10.1016/S0167-2738(00)00770-0</a>           |
| Pr <sub>0.7</sub> Sr <sub>0.3</sub> Co <sub>0.2</sub> Mn <sub>0.8</sub> O <sub>3</sub>   | 11.1  | 30  | 1000 | <a href="https://doi.org/10.1007/BF02375916">https://doi.org/10.1007/BF02375916</a>                                 |
| Pr <sub>0.6</sub> Sr <sub>0.4</sub> Co <sub>0.8</sub> Fe <sub>0.2</sub> O <sub>3</sub>   | 19.69 | 30  | 850  | <a href="https://doi.org/10.1016/j.jpowsour.2008.05.052">https://doi.org/10.1016/j.jpowsour.2008.05.052</a>         |
| Pr <sub>0.4</sub> Sr <sub>0.6</sub> Co <sub>0.8</sub> Fe <sub>0.2</sub> O <sub>3</sub>   | 21.33 | 30  | 850  | <a href="https://doi.org/10.1016/j.jpowsour.2008.05.052">https://doi.org/10.1016/j.jpowsour.2008.05.052</a>         |
| Ba <sub>0.3</sub> Sr <sub>0.7</sub> Co <sub>0.8</sub> Fe <sub>0.2</sub> O <sub>3</sub>   | 20.44 | 50  | 1000 | <a href="https://doi.org/10.1016/j.jeurceramsoc.2005.06.047">https://doi.org/10.1016/j.jeurceramsoc.2005.06.047</a> |
| Ba <sub>0.4</sub> Sr <sub>0.6</sub> Co <sub>0.8</sub> Fe <sub>0.2</sub> O <sub>3</sub>   | 20.12 | 50  | 1000 | <a href="https://doi.org/10.1016/j.jeurceramsoc.2005.06.047">https://doi.org/10.1016/j.jeurceramsoc.2005.06.047</a> |
| Ba <sub>0.5</sub> Sr <sub>0.5</sub> Co <sub>0.8</sub> Fe <sub>0.2</sub> O <sub>3</sub>   | 19.95 | 50  | 1000 | <a href="https://doi.org/10.1016/j.jeurceramsoc.2005.06.047">https://doi.org/10.1016/j.jeurceramsoc.2005.06.047</a> |
| Ba <sub>0.6</sub> Sr <sub>0.4</sub> Co <sub>0.8</sub> Fe <sub>0.2</sub> O <sub>3</sub>   | 20.18 | 50  | 1000 | <a href="https://doi.org/10.1016/j.jeurceramsoc.2005.06.047">https://doi.org/10.1016/j.jeurceramsoc.2005.06.047</a> |
| Ba <sub>0.7</sub> Sr <sub>0.3</sub> Co <sub>0.8</sub> Fe <sub>0.2</sub> O <sub>3</sub>   | 20.27 | 50  | 1000 | <a href="https://doi.org/10.1016/j.jeurceramsoc.2005.06.047">https://doi.org/10.1016/j.jeurceramsoc.2005.06.047</a> |
| Sr <sub>0.9</sub> Ce <sub>0.1</sub> Fe <sub>0.8</sub> Ni <sub>0.2</sub> O <sub>3</sub>   | 18.9  | 30  | 1000 | <a href="https://doi.org/10.1016/S0167-2738(00)00770-0">https://doi.org/10.1016/S0167-2738(00)00770-0</a>           |
| Sr <sub>0.7</sub> Ce <sub>0.3</sub> Mn <sub>0.9</sub> Al <sub>0.1</sub> O <sub>3</sub>   | 10.8  | 100 | 820  | <a href="https://doi.org/10.1016/j.jeurceramsoc.2005.03.230">https://doi.org/10.1016/j.jeurceramsoc.2005.03.230</a> |
| Sr <sub>0.7</sub> Ce <sub>0.3</sub> Mn <sub>0.8</sub> Al <sub>0.2</sub> O <sub>3</sub>   | 10.8  | 100 | 820  | <a href="https://doi.org/10.1016/j.jeurceramsoc.2005.03.230">https://doi.org/10.1016/j.jeurceramsoc.2005.03.230</a> |
| Sr <sub>0.85</sub> Ce <sub>0.15</sub> Fe <sub>0.8</sub> Co <sub>0.2</sub> O <sub>3</sub> | 18.5  | 30  | 1000 | <a href="https://doi.org/10.1016/S0167-2738(00)00770-0">https://doi.org/10.1016/S0167-2738(00)00770-0</a>           |
| La <sub>0.7</sub> Sr <sub>0.3</sub> Fe <sub>0.8</sub> Co <sub>0.2</sub> O <sub>3</sub>   | 14.9  | 30  | 1000 | <a href="https://doi.org/10.1016/S0167-2738(00)00770-0">https://doi.org/10.1016/S0167-2738(00)00770-0</a>           |
| La <sub>0.6</sub> Sr <sub>0.4</sub> Fe <sub>0.8</sub> Co <sub>0.2</sub> O <sub>3</sub>   | 17.5  | 30  | 1000 | <a href="https://doi.org/10.1016/S0167-2738(00)00770-0">https://doi.org/10.1016/S0167-2738(00)00770-0</a>           |
| La <sub>0.6</sub> Sr <sub>0.4</sub> Fe <sub>0.5</sub> Co <sub>0.5</sub> O <sub>3</sub>   | 20.3  | 30  | 1000 | <a href="https://doi.org/10.1016/S0167-2738(00)00770-0">https://doi.org/10.1016/S0167-2738(00)00770-0</a>           |
| La <sub>0.6</sub> Sr <sub>0.4</sub> Fe <sub>0.2</sub> Co <sub>0.8</sub> O <sub>3</sub>   | 21.4  | 30  | 1000 | <a href="https://doi.org/10.1016/S0167-2738(00)00770-0">https://doi.org/10.1016/S0167-2738(00)00770-0</a>           |
| La <sub>0.8</sub> Sr <sub>0.2</sub> Co <sub>0.1</sub> Fe <sub>0.9</sub> O <sub>3</sub>   | 13.9  | 30  | 1000 | <a href="https://doi.org/10.1016/S0167-2738(00)00770-0">https://doi.org/10.1016/S0167-2738(00)00770-0</a>           |
| La <sub>0.8</sub> Sr <sub>0.2</sub> Co <sub>0.5</sub> Fe <sub>0.5</sub> O <sub>3</sub>   | 17.6  | 30  | 1000 | <a href="https://doi.org/10.1016/S0167-2738(00)00770-0">https://doi.org/10.1016/S0167-2738(00)00770-0</a>           |
| Pr <sub>0.8</sub> Sr <sub>0.2</sub> Fe <sub>0.8</sub> Co <sub>0.2</sub> O <sub>3</sub>   | 12.8  | 30  | 1000 | <a href="https://doi.org/10.1016/S0167-2738(00)00770-0">https://doi.org/10.1016/S0167-2738(00)00770-0</a>           |
| Pr <sub>0.8</sub> Sr <sub>0.2</sub> Mn <sub>0.8</sub> Co <sub>0.2</sub> O <sub>3</sub>   | 10.9  | 30  | 1000 | <a href="https://doi.org/10.1016/S0167-2738(00)00770-0">https://doi.org/10.1016/S0167-2738(00)00770-0</a>           |
| La <sub>0.9</sub> Sr <sub>0.1</sub> Ga <sub>0.8</sub> Mg <sub>0.2</sub> O <sub>3</sub>   | 11.6  | 30  | 1000 | <a href="https://doi.org/10.1016/S0167-2738(00)00770-0">https://doi.org/10.1016/S0167-2738(00)00770-0</a>           |
| La <sub>0.8</sub> Sr <sub>0.2</sub> Ga <sub>0.8</sub> Mg <sub>0.2</sub> O <sub>3</sub>   | 11.4  | 30  | 1000 | <a href="https://doi.org/10.1016/S0167-2738(00)00770-0">https://doi.org/10.1016/S0167-2738(00)00770-0</a>           |
| La <sub>0.8</sub> Sr <sub>0.2</sub> Co <sub>0.9</sub> Fe <sub>0.1</sub> O <sub>3</sub>   | 20.1  | 100 | 900  | <a href="https://doi.org/10.1016/0167-2738(94)00244-M">https://doi.org/10.1016/0167-2738(94)00244-M</a>             |
| La <sub>0.8</sub> Sr <sub>0.2</sub> Co <sub>0.8</sub> Fe <sub>0.2</sub> O <sub>3</sub>   | 20.7  | 100 | 900  | <a href="https://doi.org/10.1016/0167-2738(94)00244-M">https://doi.org/10.1016/0167-2738(94)00244-M</a>             |
| La <sub>0.8</sub> Sr <sub>0.2</sub> Co <sub>0.7</sub> Fe <sub>0.3</sub> O <sub>3</sub>   | 20.3  | 100 | 900  | <a href="https://doi.org/10.1016/0167-2738(94)00244-M">https://doi.org/10.1016/0167-2738(94)00244-M</a>             |
| La <sub>0.8</sub> Sr <sub>0.2</sub> Co <sub>0.6</sub> Fe <sub>0.4</sub> O <sub>3</sub>   | 20    | 100 | 900  | <a href="https://doi.org/10.1016/0167-2738(94)00244-M">https://doi.org/10.1016/0167-2738(94)00244-M</a>             |
| La <sub>0.8</sub> Sr <sub>0.2</sub> Co <sub>0.5</sub> Fe <sub>0.5</sub> O <sub>3</sub>   | 18.7  | 100 | 900  | <a href="https://doi.org/10.1016/0167-2738(94)00244-M">https://doi.org/10.1016/0167-2738(94)00244-M</a>             |
| La <sub>0.8</sub> Sr <sub>0.2</sub> Co <sub>0.4</sub> Fe <sub>0.6</sub> O <sub>3</sub>   | 17.6  | 100 | 900  | <a href="https://doi.org/10.1016/0167-2738(94)00244-M">https://doi.org/10.1016/0167-2738(94)00244-M</a>             |
| La <sub>0.8</sub> Sr <sub>0.2</sub> Co <sub>0.3</sub> Fe <sub>0.7</sub> O <sub>3</sub>   | 16.5  | 100 | 900  | <a href="https://doi.org/10.1016/0167-2738(94)00244-M">https://doi.org/10.1016/0167-2738(94)00244-M</a>             |
| La <sub>0.8</sub> Sr <sub>0.2</sub> Co <sub>0.2</sub> Fe <sub>0.8</sub> O <sub>3</sub>   | 15.4  | 100 | 800  | <a href="https://doi.org/10.1016/0167-2738(94)00244-M">https://doi.org/10.1016/0167-2738(94)00244-M</a>             |
| La <sub>0.8</sub> Sr <sub>0.2</sub> Co <sub>0.1</sub> Fe <sub>0.9</sub> O <sub>3</sub>   | 14.5  | 200 | 900  | <a href="https://doi.org/10.1016/0167-2738(94)00244-M">https://doi.org/10.1016/0167-2738(94)00244-M</a>             |
| La <sub>0.9</sub> Sr <sub>0.1</sub> Co <sub>0.2</sub> Fe <sub>0.8</sub> O <sub>3</sub>   | 16    | 30  | 900  | <a href="https://doi.org/10.1016/0167-2738(94)00245-N">https://doi.org/10.1016/0167-2738(94)00245-N</a>             |
| La <sub>0.7</sub> Sr <sub>0.3</sub> Co <sub>0.2</sub> Fe <sub>0.8</sub> O <sub>3</sub>   | 14.6  | 30  | 700  | <a href="https://doi.org/10.1016/0167-2738(94)00245-N">https://doi.org/10.1016/0167-2738(94)00245-N</a>             |
| La <sub>0.6</sub> Sr <sub>0.4</sub> Co <sub>0.2</sub> Fe <sub>0.8</sub> O <sub>3</sub>   | 15.3  | 30  | 600  | <a href="https://doi.org/10.1016/j.ssi.2012.01.001">https://doi.org/10.1016/j.ssi.2012.01.001</a>                   |
| La <sub>0.4</sub> Sr <sub>0.6</sub> Co <sub>0.2</sub> Fe <sub>0.8</sub> O <sub>3</sub>   | 16.8  | 30  | 400  | <a href="https://doi.org/10.1016/0167-2738(94)00245-N">https://doi.org/10.1016/0167-2738(94)00245-N</a>             |
| La <sub>0.3</sub> Sr <sub>0.7</sub> Co <sub>0.9</sub> Fe <sub>0.1</sub> O <sub>3</sub>   | 19.2  | 30  | 1000 | <a href="https://doi.org/10.1016/S0167-2738(00)00394-5">https://doi.org/10.1016/S0167-2738(00)00394-5</a>           |
| La <sub>0.3</sub> Sr <sub>0.7</sub> Co <sub>0.8</sub> Fe <sub>0.2</sub> O <sub>3</sub>   | 21    | 30  | 1000 | <a href="https://doi.org/10.1016/S0167-2738(00)00394-5">https://doi.org/10.1016/S0167-2738(00)00394-5</a>           |
| La <sub>0.3</sub> Sr <sub>0.7</sub> Co <sub>0.7</sub> Fe <sub>0.3</sub> O <sub>3</sub>   | 24.7  | 30  | 1000 | <a href="https://doi.org/10.1016/S0167-2738(00)00394-5">https://doi.org/10.1016/S0167-2738(00)00394-5</a>           |
| La <sub>0.3</sub> Sr <sub>0.7</sub> Co <sub>0.6</sub> Fe <sub>0.4</sub> O <sub>3</sub>   | 24.1  | 30  | 1000 | <a href="https://doi.org/10.1016/S0167-2738(00)00394-5">https://doi.org/10.1016/S0167-2738(00)00394-5</a>           |
| La <sub>0.3</sub> Sr <sub>0.7</sub> Co <sub>0.5</sub> Fe <sub>0.5</sub> O <sub>3</sub>   | 23.5  | 30  | 1000 | <a href="https://doi.org/10.1016/S0167-2738(00)00394-5">https://doi.org/10.1016/S0167-2738(00)00394-5</a>           |
| La <sub>0.3</sub> Sr <sub>0.7</sub> Co <sub>0.4</sub> Fe <sub>0.6</sub> O <sub>3</sub>   | 23.9  | 30  | 1000 | <a href="https://doi.org/10.1016/S0167-2738(00)00394-5">https://doi.org/10.1016/S0167-2738(00)00394-5</a>           |
| La <sub>0.3</sub> Sr <sub>0.7</sub> Co <sub>0.3</sub> Fe <sub>0.7</sub> O <sub>3</sub>   | 27.1  | 30  | 1000 | <a href="https://doi.org/10.1016/S0167-2738(00)00394-5">https://doi.org/10.1016/S0167-2738(00)00394-5</a>           |

|                                                                                          |       |    |      |                                                                                                                                                         |
|------------------------------------------------------------------------------------------|-------|----|------|---------------------------------------------------------------------------------------------------------------------------------------------------------|
| La <sub>0.3</sub> Sr <sub>0.7</sub> Co <sub>0.2</sub> Fe <sub>0.8</sub> O <sub>3</sub>   | 27.1  | 30 | 1000 | <a href="https://doi.org/10.1016/S0167-2738(00)00394-5">https://doi.org/10.1016/S0167-2738(00)00394-5</a>                                               |
| La <sub>0.3</sub> Sr <sub>0.7</sub> Co <sub>0.1</sub> Fe <sub>0.9</sub> O <sub>3</sub>   | 24.8  | 30 | 1000 | <a href="https://doi.org/10.1016/S0167-2738(00)00394-5">https://doi.org/10.1016/S0167-2738(00)00394-5</a>                                               |
| La <sub>0.8</sub> Sr <sub>0.2</sub> Co <sub>0.2</sub> Fe <sub>0.8</sub> O <sub>3</sub>   | 14.8  | 30 | 1000 | <a href="https://doi.org/10.1016/S0167-2738(00)00770-0">https://doi.org/10.1016/S0167-2738(00)00770-0</a>                                               |
| La <sub>0.7</sub> Sr <sub>0.3</sub> Co <sub>0.2</sub> Fe <sub>0.8</sub> O <sub>3</sub>   | 16    | 30 | 1000 | <a href="https://doi.org/10.1016/S0167-2738(00)00394-5">https://doi.org/10.1016/S0167-2738(00)00394-5</a>                                               |
| La <sub>0.6</sub> Sr <sub>0.4</sub> Co <sub>0.2</sub> Fe <sub>0.8</sub> O <sub>3</sub>   | 17.5  | 30 | 1000 | <a href="https://doi.org/10.1016/S0167-2738(00)00770-0">https://doi.org/10.1016/S0167-2738(00)00770-0</a>                                               |
| La <sub>0.4</sub> Sr <sub>0.6</sub> Ti <sub>0.4</sub> Mn <sub>0.6</sub> O <sub>3</sub>   | 11.6  | 30 | 800  | <a href="https://doi.org/10.1002/face.200800018">https://doi.org/10.1002/face.200800018</a>                                                             |
| La <sub>0.8</sub> Sr <sub>0.2</sub> Al <sub>0.5</sub> Mn <sub>0.5</sub> O <sub>3</sub>   | 10.9  | 30 | 800  | <a href="https://doi.org/10.1002/face.200800018">https://doi.org/10.1002/face.200800018</a>                                                             |
| La <sub>0.7</sub> Sr <sub>0.3</sub> Cr <sub>0.5</sub> Co <sub>0.5</sub> O <sub>3</sub>   | 19    | 30 | 600  | <a href="https://doi.org/10.1007/s100080050161">https://doi.org/10.1007/s100080050161</a>                                                               |
| La <sub>0.75</sub> Sr <sub>0.25</sub> Cr <sub>0.5</sub> Mn <sub>0.5</sub> O <sub>3</sub> | 12    | 30 | 1000 | <a href="https://doi.org/10.1016/j.ijhydene.2010.12.085">https://doi.org/10.1016/j.ijhydene.2010.12.085</a>                                             |
| Bi <sub>0.5</sub> Sr <sub>0.5</sub> Fe <sub>0.85</sub> Ti <sub>0.15</sub> O <sub>3</sub> | 13.4  | 30 | 800  | <a href="https://doi.org/10.1021/acssuschemeng.9b05086">https://doi.org/10.1021/acssuschemeng.9b05086</a>                                               |
| Bi <sub>0.5</sub> Sr <sub>0.5</sub> Fe <sub>0.95</sub> Ti <sub>0.05</sub> O <sub>3</sub> | 13.7  | 30 | 800  | <a href="https://doi.org/10.1021/acssuschemeng.9b05086">https://doi.org/10.1021/acssuschemeng.9b05086</a>                                               |
| Bi <sub>0.5</sub> Sr <sub>0.5</sub> Fe <sub>0.9</sub> Ti <sub>0.1</sub> O <sub>3</sub>   | 13.5  | 30 | 800  | <a href="https://doi.org/10.1021/acssuschemeng.9b05086">https://doi.org/10.1021/acssuschemeng.9b05086</a>                                               |
| Bi <sub>0.5</sub> Sr <sub>0.5</sub> Fe <sub>0.8</sub> Ti <sub>0.2</sub> O <sub>3</sub>   | 13.3  | 30 | 800  | <a href="https://doi.org/10.1021/acssuschemeng.9b05086">https://doi.org/10.1021/acssuschemeng.9b05086</a>                                               |
| Bi <sub>0.5</sub> Sr <sub>0.5</sub> Fe <sub>0.9</sub> Sn <sub>0.1</sub> O <sub>3</sub>   | 12.9  | 30 | 800  | <a href="https://doi.org/10.1016/j.jallcom.2020.155406">https://doi.org/10.1016/j.jallcom.2020.155406</a>                                               |
| Bi <sub>0.5</sub> Sr <sub>0.5</sub> Fe <sub>0.8</sub> Cu <sub>0.2</sub> O <sub>3</sub>   | 13.1  | 30 | 800  | <a href="https://doi.org/10.1016/j.jallcom.2017.01.026">https://doi.org/10.1016/j.jallcom.2017.01.026</a>                                               |
| Bi <sub>0.5</sub> Sr <sub>0.5</sub> Fe <sub>0.95</sub> Nb <sub>0.05</sub> O <sub>3</sub> | 13.3  | 30 | 800  | <a href="https://doi.org/10.1016/j.jpowsour.2017.10.036">https://doi.org/10.1016/j.jpowsour.2017.10.036</a>                                             |
| Bi <sub>0.5</sub> Sr <sub>0.5</sub> Fe <sub>0.9</sub> Nb <sub>0.1</sub> O <sub>3</sub>   | 12.9  | 30 | 800  | <a href="https://doi.org/10.1016/j.jpowsour.2017.10.036">https://doi.org/10.1016/j.jpowsour.2017.10.036</a>                                             |
| Bi <sub>0.5</sub> Sr <sub>0.5</sub> Fe <sub>0.85</sub> Nb <sub>0.15</sub> O <sub>3</sub> | 12.6  | 30 | 800  | <a href="https://doi.org/10.1016/j.jpowsour.2017.10.036">https://doi.org/10.1016/j.jpowsour.2017.10.036</a>                                             |
| Bi <sub>0.5</sub> Sr <sub>0.5</sub> Fe <sub>0.95</sub> Ta <sub>0.05</sub> O <sub>3</sub> | 11.8  | 30 | 800  | <a href="https://doi.org/10.1016/j.ceramint.2019.06.295">https://doi.org/10.1016/j.ceramint.2019.06.295</a>                                             |
| Bi <sub>0.5</sub> Sr <sub>0.5</sub> Fe <sub>0.9</sub> Ta <sub>0.1</sub> O <sub>3</sub>   | 11.4  | 30 | 800  | <a href="https://doi.org/10.1016/j.ceramint.2019.06.295">https://doi.org/10.1016/j.ceramint.2019.06.295</a>                                             |
| La <sub>0.9</sub> Ca <sub>0.1</sub> Fe <sub>0.9</sub> Nb <sub>0.1</sub> O <sub>3</sub>   | 11.8  | 30 | 900  | <a href="https://doi.org/10.1016/j.ijhydene.2017.04.291">https://doi.org/10.1016/j.ijhydene.2017.04.291</a>                                             |
| Sm <sub>0.7</sub> Sr <sub>0.3</sub> Fe <sub>0.8</sub> Co <sub>0.2</sub> O <sub>3</sub>   | 13.7  | 25 | 600  | <a href="https://doi.org/10.1016/10.1149/1.2818766">https://doi.org/10.1016/10.1149/1.2818766</a>                                                       |
| Nd <sub>0.7</sub> Sr <sub>0.3</sub> Fe <sub>0.8</sub> Co <sub>0.2</sub> O <sub>3</sub>   | 13.4  | 25 | 600  | <a href="https://doi.org/10.1149/1.2818766">https://doi.org/10.1149/1.2818766</a>                                                                       |
| Ba <sub>0.7</sub> Sr <sub>0.3</sub> Fe <sub>0.8</sub> Co <sub>0.2</sub> O <sub>3</sub>   | 20.2  | 25 | 600  | <a href="https://doi.org/10.1149/1.2818766">https://doi.org/10.1149/1.2818766</a>                                                                       |
| La <sub>0.7</sub> Sr <sub>0.3</sub> Fe <sub>0.8</sub> Co <sub>0.2</sub> O <sub>3</sub>   | 12.5  | 25 | 600  | <a href="https://doi.org/10.1149/1.2818766">https://doi.org/10.1149/1.2818766</a>                                                                       |
| Pr <sub>0.7</sub> Sr <sub>0.3</sub> Fe <sub>0.8</sub> Co <sub>0.2</sub> O <sub>3</sub>   | 12.4  | 25 | 600  | <a href="https://doi.org/10.1149/1.2818766">https://doi.org/10.1149/1.2818766</a>                                                                       |
| Gd <sub>0.7</sub> Sr <sub>0.3</sub> Fe <sub>0.8</sub> Co <sub>0.2</sub> O <sub>3</sub>   | 15.8  | 25 | 600  | <a href="https://doi.org/10.1149/1.2818766">https://doi.org/10.1149/1.2818766</a>                                                                       |
| Dy <sub>0.7</sub> Sr <sub>0.3</sub> Fe <sub>0.8</sub> Co <sub>0.2</sub> O <sub>3</sub>   | 13.3  | 25 | 600  | <a href="https://doi.org/10.1149/1.2818766">https://doi.org/10.1149/1.2818766</a>                                                                       |
| Er <sub>0.7</sub> Sr <sub>0.3</sub> Fe <sub>0.8</sub> Co <sub>0.2</sub> O <sub>3</sub>   | 13.3  | 25 | 600  | <a href="https://doi.org/10.1149/1.2818766">https://doi.org/10.1149/1.2818766</a>                                                                       |
| La <sub>0.7</sub> Sr <sub>0.3</sub> Cr <sub>0.5</sub> Co <sub>0.5</sub> O <sub>3</sub>   | 19    | 30 | 600  | <a href="https://doi.org/10.1007/s100080050161">https://doi.org/10.1007/s100080050161</a>                                                               |
| La <sub>0.7</sub> Sr <sub>0.3</sub> Cr <sub>0.2</sub> Co <sub>0.8</sub> O <sub>3</sub>   | 19    | 30 | 600  | <a href="https://doi.org/10.1007/s100080050161">https://doi.org/10.1007/s100080050161</a>                                                               |
| La <sub>0.6</sub> Sr <sub>0.4</sub> Mn <sub>0.8</sub> Fe <sub>0.2</sub> O <sub>3</sub>   | 11.3  | 30 | 827  | <a href="https://doi.org/10.1007/s100080050161">https://doi.org/10.1007/s100080050161</a>                                                               |
| La <sub>0.6</sub> Sr <sub>0.4</sub> Mn <sub>0.6</sub> Fe <sub>0.4</sub> O <sub>3</sub>   | 12    | 30 | 827  | <a href="https://doi.org/10.1007/s100080050161">https://doi.org/10.1007/s100080050161</a>                                                               |
| La <sub>0.6</sub> Sr <sub>0.4</sub> Mn <sub>0.5</sub> Fe <sub>0.5</sub> O <sub>3</sub>   | 12.7  | 30 | 827  | <a href="https://doi.org/10.1007/s100080050161">https://doi.org/10.1007/s100080050161</a>                                                               |
| La <sub>0.6</sub> Sr <sub>0.4</sub> Mn <sub>0.8</sub> Ni <sub>0.2</sub> O <sub>3</sub>   | 12.7  | 30 | 827  | <a href="https://doi.org/10.1007/s100080050161">https://doi.org/10.1007/s100080050161</a>                                                               |
| La <sub>0.6</sub> Sr <sub>0.4</sub> Mn <sub>0.6</sub> Ni <sub>0.4</sub> O <sub>3</sub>   | 12.5  | 30 | 827  | <a href="https://doi.org/10.1007/s100080050161">https://doi.org/10.1007/s100080050161</a>                                                               |
| La <sub>0.5</sub> Sr <sub>0.5</sub> Co <sub>0.75</sub> Ni <sub>0.25</sub> O <sub>3</sub> | 14.2  | 27 | 697  | <a href="https://doi.org/10.1007/s100080050161">https://doi.org/10.1007/s100080050161</a>                                                               |
| Sm <sub>0.5</sub> Sr <sub>0.5</sub> Cu <sub>0.2</sub> Fe <sub>0.8</sub> O <sub>3</sub>   | 15.9  | 30 | 900  | <a href="https://doi.org/10.1016/j.ijhydene.2010.04.021">https://doi.org/10.1016/j.ijhydene.2010.04.021</a>                                             |
| La <sub>0.9</sub> Sr <sub>0.1</sub> Cr <sub>0.9</sub> Ni <sub>0.1</sub> O <sub>3</sub>   | 9.11  | 30 | 800  | <a href="http://203.158.7.72:8080/jspui/bitstream/123456789/3624/1/131555.pdf">http://203.158.7.72:8080/jspui/bitstream/123456789/3624/1/131555.pdf</a> |
| La <sub>0.9</sub> Sr <sub>0.1</sub> Cr <sub>0.8</sub> Ni <sub>0.2</sub> O <sub>3</sub>   | 10.48 | 30 | 800  | <a href="http://203.158.7.72:8080/jspui/bitstream/123456789/3624/1/131555.pdf">http://203.158.7.72:8080/jspui/bitstream/123456789/3624/1/131555.pdf</a> |
| La <sub>0.9</sub> Sr <sub>0.1</sub> Cr <sub>0.7</sub> Ni <sub>0.3</sub> O <sub>3</sub>   | 10.52 | 30 | 800  | <a href="http://203.158.7.72:8080/jspui/bitstream/123456789/3624/1/131555.pdf">http://203.158.7.72:8080/jspui/bitstream/123456789/3624/1/131555.pdf</a> |
| La <sub>0.9</sub> Sr <sub>0.1</sub> Cr <sub>0.6</sub> Ni <sub>0.4</sub> O <sub>3</sub>   | 11.98 | 30 | 800  | <a href="http://203.158.7.72:8080/jspui/bitstream/123456789/3624/1/131555.pdf">http://203.158.7.72:8080/jspui/bitstream/123456789/3624/1/131555.pdf</a> |
| La <sub>0.9</sub> Sr <sub>0.1</sub> Cr <sub>0.5</sub> Ni <sub>0.5</sub> O <sub>3</sub>   | 12.51 | 30 | 800  | <a href="http://203.158.7.72:8080/jspui/bitstream/123456789/3624/1/131555.pdf">http://203.158.7.72:8080/jspui/bitstream/123456789/3624/1/131555.pdf</a> |

|                                                                                          |       |     |      |                                                                                                                                                         |
|------------------------------------------------------------------------------------------|-------|-----|------|---------------------------------------------------------------------------------------------------------------------------------------------------------|
| La <sub>0.9</sub> Sr <sub>0.1</sub> Cr <sub>0.4</sub> Ni <sub>0.6</sub> O <sub>3</sub>   | 12.86 | 30  | 800  | <a href="http://203.158.7.72:8080/jspui/bitstream/123456789/3624/1/131555.pdf">http://203.158.7.72:8080/jspui/bitstream/123456789/3624/1/131555.pdf</a> |
| Ba <sub>0.5</sub> Sr <sub>0.5</sub> Fe <sub>0.9</sub> Sb <sub>0.1</sub> O <sub>3</sub>   | 17.2  | 700 | 1000 | <a href="https://doi.org/10.1016/j.jallcom.2016.01.122">https://doi.org/10.1016/j.jallcom.2016.01.122</a>                                               |
| Ba <sub>0.5</sub> Sr <sub>0.5</sub> Fe <sub>0.95</sub> Sb <sub>0.05</sub> O <sub>3</sub> | 29.1  | 700 | 1000 | <a href="https://doi.org/10.1016/j.jallcom.2016.01.122">https://doi.org/10.1016/j.jallcom.2016.01.122</a>                                               |
| Ba <sub>0.5</sub> Sr <sub>0.5</sub> Fe <sub>0.8</sub> Cu <sub>0.2</sub> O <sub>3</sub>   | 25.8  | 30  | 800  | <a href="https://doi.org/10.1007/s10832-014-9901-9">https://doi.org/10.1007/s10832-014-9901-9</a>                                                       |
| Ba <sub>0.5</sub> Sr <sub>0.5</sub> Fe <sub>0.9</sub> Nb <sub>0.1</sub> O <sub>3</sub>   | 19.2  | 30  | 1000 | <a href="https://doi.org/10.1016/j.jallcom.2012.07.115">https://doi.org/10.1016/j.jallcom.2012.07.115</a>                                               |
| La <sub>0.5</sub> Sr <sub>0.5</sub> Fe <sub>0.8</sub> Cu <sub>0.2</sub> O <sub>3</sub>   | 15.8  | 30  | 850  | <a href="https://doi.org/10.1016/j.jpowsour.2016.06.134">https://doi.org/10.1016/j.jpowsour.2016.06.134</a>                                             |
| La <sub>0.6</sub> Ba <sub>0.4</sub> Fe <sub>0.8</sub> Ni <sub>0.2</sub> O <sub>3</sub>   | 17.5  | 30  | 900  | <a href="https://doi.org/10.1007/s11581-015-1402-6">https://doi.org/10.1007/s11581-015-1402-6</a>                                                       |
| Nd <sub>0.5</sub> Sr <sub>0.5</sub> Fe <sub>0.8</sub> Cu <sub>0.2</sub> O <sub>3</sub>   | 14.7  | 30  | 800  | <a href="https://doi.org/10.1021/jp500371w">https://doi.org/10.1021/jp500371w</a>                                                                       |
| Pr <sub>0.5</sub> Sr <sub>0.5</sub> Fe <sub>0.8</sub> Cu <sub>0.2</sub> O <sub>3</sub>   | 16.4  | 30  | 850  | <a href="https://doi.org/10.1016/j.jpowsour.2016.06.134">https://doi.org/10.1016/j.jpowsour.2016.06.134</a>                                             |
| Pr <sub>0.6</sub> Sr <sub>0.4</sub> Fe <sub>0.8</sub> Ni <sub>0.2</sub> O <sub>3</sub>   | 16.97 | 30  | 1000 | <a href="https://doi.org/10.1016/j.electacta.2016.12.170">https://doi.org/10.1016/j.electacta.2016.12.170</a>                                           |
| La <sub>0.5</sub> Sr <sub>0.5</sub> Co <sub>0.8</sub> Mn <sub>0.2</sub> O <sub>3</sub>   | 17.72 | 30  | 600  | <a href="https://doi.org/10.1111/jace.14127">https://doi.org/10.1111/jace.14127</a>                                                                     |
| La <sub>0.5</sub> Sr <sub>0.5</sub> Co <sub>0.8</sub> Fe <sub>0.2</sub> O <sub>3</sub>   | 20.62 | 30  | 600  | <a href="https://doi.org/10.1111/jace.14127">https://doi.org/10.1111/jace.14127</a>                                                                     |
| La <sub>0.5</sub> Sr <sub>0.5</sub> Co <sub>0.8</sub> Ni <sub>0.2</sub> O <sub>3</sub>   | 21.38 | 30  | 600  | <a href="https://doi.org/10.1111/jace.14127">https://doi.org/10.1111/jace.14127</a>                                                                     |
| La <sub>0.5</sub> Sr <sub>0.5</sub> Co <sub>0.8</sub> Cu <sub>0.2</sub> O <sub>3</sub>   | 19.75 | 30  | 600  | <a href="https://doi.org/10.1111/jace.14127">https://doi.org/10.1111/jace.14127</a>                                                                     |
| La <sub>0.95</sub> Sr <sub>0.05</sub> Ni <sub>0.5</sub> Mn <sub>0.5</sub> O <sub>3</sub> | 11.29 | 30  | 850  | <a href="https://doi.org/10.1016/j.ijhydene.2016.08.197">https://doi.org/10.1016/j.ijhydene.2016.08.197</a>                                             |
| La <sub>0.9</sub> Sr <sub>0.1</sub> Ni <sub>0.5</sub> Mn <sub>0.5</sub> O <sub>3</sub>   | 11.33 | 30  | 850  | <a href="https://doi.org/10.1016/j.ijhydene.2016.08.197">https://doi.org/10.1016/j.ijhydene.2016.08.197</a>                                             |
| La <sub>0.85</sub> Sr <sub>0.15</sub> Ni <sub>0.5</sub> Mn <sub>0.5</sub> O <sub>3</sub> | 11.83 | 30  | 850  | <a href="https://doi.org/10.1016/j.ijhydene.2016.08.197">https://doi.org/10.1016/j.ijhydene.2016.08.197</a>                                             |
| Bi <sub>0.7</sub> Sr <sub>0.3</sub> Fe <sub>0.5</sub> Mn <sub>0.5</sub> O <sub>3</sub>   | 13.4  | 30  | 800  | <a href="https://doi.org/10.1016/j.ssi.2013.09.056">https://doi.org/10.1016/j.ssi.2013.09.056</a>                                                       |
| La <sub>0.6</sub> Ca <sub>0.4</sub> Fe <sub>0.8</sub> Ni <sub>0.2</sub> O <sub>3</sub>   | 11.2  | 30  | 1000 | <a href="https://doi.org/10.1007/s40843-020-1567-2">https://doi.org/10.1007/s40843-020-1567-2</a>                                                       |
| La <sub>0.6</sub> Sr <sub>0.4</sub> Fe <sub>0.8</sub> Ni <sub>0.2</sub> O <sub>3</sub>   | 11.9  | 30  | 1000 | <a href="https://doi.org/10.1021/acsaem.9b00115">https://doi.org/10.1021/acsaem.9b00115</a>                                                             |
| Nd <sub>0.3</sub> Sr <sub>0.7</sub> Fe <sub>0.8</sub> Cu <sub>0.2</sub> O <sub>3</sub>   | 16.1  | 30  | 800  | <a href="https://doi.org/10.1021/jp500371w">https://doi.org/10.1021/jp500371w</a>                                                                       |
| Nd <sub>0.4</sub> Sr <sub>0.6</sub> Fe <sub>0.8</sub> Cu <sub>0.2</sub> O <sub>3</sub>   | 15.6  | 30  | 800  | <a href="https://doi.org/10.1021/jp500371w">https://doi.org/10.1021/jp500371w</a>                                                                       |
| Nd <sub>0.6</sub> Sr <sub>0.4</sub> Fe <sub>0.8</sub> Cu <sub>0.2</sub> O <sub>3</sub>   | 14.2  | 30  | 800  | <a href="https://doi.org/10.1021/jp500371w">https://doi.org/10.1021/jp500371w</a>                                                                       |
| Nd <sub>0.7</sub> Sr <sub>0.3</sub> Fe <sub>0.8</sub> Cu <sub>0.2</sub> O <sub>3</sub>   | 14    | 30  | 800  | <a href="https://doi.org/10.1021/jp500371w">https://doi.org/10.1021/jp500371w</a>                                                                       |
| La <sub>0.2</sub> Sr <sub>0.8</sub> Co <sub>0.9</sub> Sb <sub>0.1</sub> O <sub>3</sub>   | 22.99 | 30  | 900  | <a href="https://doi.org/10.1016/j.ceramint.2017.02.070">https://doi.org/10.1016/j.ceramint.2017.02.070</a>                                             |
| La <sub>0.4</sub> Sr <sub>0.6</sub> Co <sub>0.9</sub> Sb <sub>0.1</sub> O <sub>3</sub>   | 22.49 | 30  | 900  | <a href="https://doi.org/10.1016/j.ceramint.2017.02.070">https://doi.org/10.1016/j.ceramint.2017.02.070</a>                                             |
| La <sub>0.8</sub> Sr <sub>0.2</sub> Fe <sub>0.7</sub> Ni <sub>0.3</sub> O <sub>3</sub>   | 12.1  | 30  | 800  | <a href="https://doi.org/10.1016/j.solidstatesciences.2020.106356">https://doi.org/10.1016/j.solidstatesciences.2020.106356</a>                         |
| La <sub>0.6</sub> Sr <sub>0.4</sub> Fe <sub>0.7</sub> Ni <sub>0.3</sub> O <sub>3</sub>   | 13.8  | 30  | 800  | <a href="https://doi.org/10.1016/j.solidstatesciences.2020.106356">https://doi.org/10.1016/j.solidstatesciences.2020.106356</a>                         |
| La <sub>0.7</sub> Sr <sub>0.3</sub> Cu <sub>0.2</sub> Fe <sub>0.8</sub> O <sub>3</sub>   | 13.6  | 30  | 600  | <a href="https://doi.org/10.1016/j.jallcom.2008.07.044">https://doi.org/10.1016/j.jallcom.2008.07.044</a>                                               |
| Sm <sub>0.5</sub> Sr <sub>0.5</sub> Fe <sub>0.7</sub> Cr <sub>0.3</sub> O <sub>3</sub>   | 12.8  | 30  | 1000 | <a href="https://doi.org/10.1002/er.4377">https://doi.org/10.1002/er.4377</a>                                                                           |
| Sm <sub>0.4</sub> Sr <sub>0.6</sub> Fe <sub>0.7</sub> Cr <sub>0.3</sub> O <sub>3</sub>   | 14    | 30  | 1000 | <a href="https://doi.org/10.1002/er.4377">https://doi.org/10.1002/er.4377</a>                                                                           |
| Sm <sub>0.3</sub> Sr <sub>0.7</sub> Fe <sub>0.7</sub> Cr <sub>0.3</sub> O <sub>3</sub>   | 14.1  | 30  | 1000 | <a href="https://doi.org/10.1002/er.4377">https://doi.org/10.1002/er.4377</a>                                                                           |
| Sm <sub>0.5</sub> Sr <sub>0.5</sub> Fe <sub>0.1</sub> Co <sub>0.9</sub> O <sub>3</sub>   | 20.4  | 30  | 900  | <a href="https://doi.org/10.1016/j.materresbull.2007.02.007">https://doi.org/10.1016/j.materresbull.2007.02.007</a>                                     |
| Sm <sub>0.5</sub> Sr <sub>0.5</sub> Fe <sub>0.2</sub> Co <sub>0.8</sub> O <sub>3</sub>   | 20.8  | 30  | 900  | <a href="https://doi.org/10.1016/j.materresbull.2007.02.007">https://doi.org/10.1016/j.materresbull.2007.02.007</a>                                     |
| Sm <sub>0.5</sub> Sr <sub>0.5</sub> Fe <sub>0.4</sub> Co <sub>0.6</sub> O <sub>3</sub>   | 19.5  | 30  | 900  | <a href="https://doi.org/10.1016/j.materresbull.2007.02.007">https://doi.org/10.1016/j.materresbull.2007.02.007</a>                                     |
| Sm <sub>0.5</sub> Sr <sub>0.5</sub> Fe <sub>0.6</sub> Co <sub>0.4</sub> O <sub>3</sub>   | 18.2  | 30  | 900  | <a href="https://doi.org/10.1016/j.materresbull.2007.02.007">https://doi.org/10.1016/j.materresbull.2007.02.007</a>                                     |
| Sm <sub>0.5</sub> Sr <sub>0.5</sub> Fe <sub>0.8</sub> Co <sub>0.2</sub> O <sub>3</sub>   | 15.8  | 30  | 900  | <a href="https://doi.org/10.1016/j.materresbull.2007.02.007">https://doi.org/10.1016/j.materresbull.2007.02.007</a>                                     |
| Sm <sub>0.5</sub> Sr <sub>0.5</sub> Mn <sub>0.1</sub> Co <sub>0.9</sub> O <sub>3</sub>   | 16.7  | 30  | 900  | <a href="https://doi.org/10.1016/j.materresbull.2007.02.007">https://doi.org/10.1016/j.materresbull.2007.02.007</a>                                     |
| Sm <sub>0.5</sub> Sr <sub>0.5</sub> Mn <sub>0.2</sub> Co <sub>0.8</sub> O <sub>3</sub>   | 15.6  | 30  | 900  | <a href="https://doi.org/10.1016/j.materresbull.2007.02.007">https://doi.org/10.1016/j.materresbull.2007.02.007</a>                                     |
| Sm <sub>0.5</sub> Sr <sub>0.5</sub> Mn <sub>0.4</sub> Co <sub>0.6</sub> O <sub>3</sub>   | 14.8  | 30  | 900  | <a href="https://doi.org/10.1016/j.materresbull.2007.02.007">https://doi.org/10.1016/j.materresbull.2007.02.007</a>                                     |
| Sm <sub>0.5</sub> Sr <sub>0.5</sub> Mn <sub>0.6</sub> Co <sub>0.4</sub> O <sub>3</sub>   | 13.8  | 30  | 900  | <a href="https://doi.org/10.1016/j.materresbull.2007.02.007">https://doi.org/10.1016/j.materresbull.2007.02.007</a>                                     |
| Sm <sub>0.5</sub> Sr <sub>0.5</sub> Mn <sub>0.8</sub> Co <sub>0.2</sub> O <sub>3</sub>   | 11.7  | 30  | 900  | <a href="https://doi.org/10.1016/j.materresbull.2007.02.007">https://doi.org/10.1016/j.materresbull.2007.02.007</a>                                     |

Table S1. AA'BB'O<sub>3</sub> Dataset Used in this work

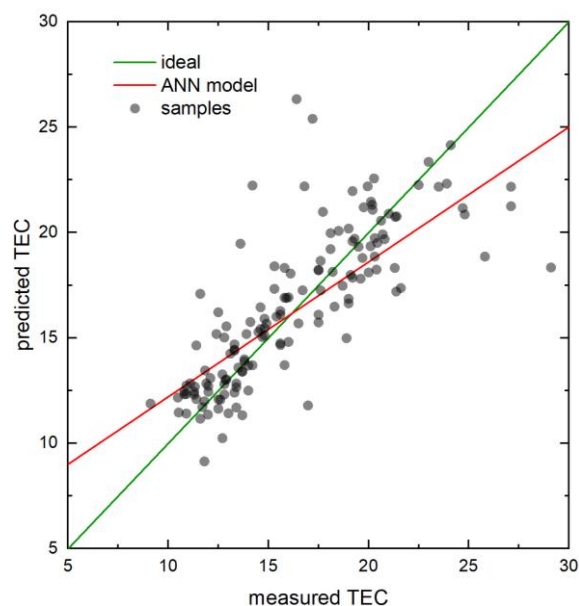

Figure S1. Plot of predicted TEC vs. measured TEC for the ANN model TEC predictions

| Element | A occurrences | Element | B occurrences |
|---------|---------------|---------|---------------|
| Sr      | 143           | Fe      | 103           |
| La      | 84            | Co      | 86            |
| Sm      | 16            | Mn      | 31            |
| Bi      | 12            | Ni      | 21            |
| Ba      | 11            | Cu      | 14            |
| Pr      | 9             | Cr      | 13            |
| Nd      | 7             | Ti      | 5             |
| Ce      | 4             | Nb      | 5             |
| Gd      | 2             | Sb      | 4             |
| Ca      | 2             | Al      | 3             |
| Dy      | 1             | Ga      | 2             |
| Er      | 1             | Mg      | 2             |
|         |               | Ta      | 2             |
|         |               | Sn      | 1             |

Table S2. Element occurrences in each site in the TEC dataset used for this work

| Element | A occurrences | Element | B occurrences |
|---------|---------------|---------|---------------|
| Sr      | 204           | Fe      | 116           |
| La      | 171           | Co      | 86            |
| Ba      | 62            | Ti      | 83            |
| Ca      | 29            | Mn      | 76            |
| Pb      | 24            | Mg      | 33            |



|    |   |   |   |   |   |   |   |   |   |   |   |   |   |   |   |   |   |    |   |
|----|---|---|---|---|---|---|---|---|---|---|---|---|---|---|---|---|---|----|---|
| Na | 0 | 0 | 0 | 0 | 0 | 0 | 0 | 0 | 0 | 0 | 0 | 0 | 0 | 0 | 0 | 0 | 0 | 0  |   |
| Nd | 0 | 0 | 0 | 0 | 0 | 0 | 0 | 0 | 0 | 0 | 0 | 0 | 0 | 0 | 1 | 0 | 0 | 12 | 0 |
| Pb | 0 | 4 | 0 | 0 | 0 | 0 | 0 | 0 | 0 | 0 | 0 | 0 | 0 | 0 | 0 | 0 | 0 | 2  | 0 |
| Pr | 0 | 0 | 1 | 0 | 0 | 0 | 0 | 0 | 0 | 0 | 0 | 0 | 0 | 0 | 0 | 0 | 0 | 10 | 0 |
| Sm | 0 | 0 | 0 | 0 | 0 | 0 | 0 | 0 | 0 | 0 | 0 | 0 | 0 | 0 | 0 | 0 | 0 | 16 | 0 |
| Sr | 0 | 1 | 0 | 4 | 0 | 0 | 0 | 0 | 0 | 0 | 0 | 0 | 0 | 0 | 0 | 2 | 0 | 0  | 3 |
| Y  | 0 | 0 | 0 | 0 | 0 | 0 | 0 | 0 | 0 | 0 | 0 | 0 | 0 | 0 | 0 | 0 | 0 | 0  | 0 |

Table S4. Occurrences of A and A' combinations using AA'BB'O<sub>3</sub> compositions from the dataset used for this work, as well as compositions from the PCD and COD

|    |   | B-site Combinations |    |    |    |    |    |    |    |    |    |    |    |    |    |    |    |    |    |    |    |    |    |    |    |    |   |   |    |    |    |    |   |   |
|----|---|---------------------|----|----|----|----|----|----|----|----|----|----|----|----|----|----|----|----|----|----|----|----|----|----|----|----|---|---|----|----|----|----|---|---|
|    |   | Al                  | Bi | Ce | Cd | Co | Cr | Cu | Dy | Er | Fe | Ga | Gd | Mg | Mn | Nb | Nd | Ni | Ru | Sb | Sc | Sm | Sn | Ta | Ti | V  | W | Y | Yb | Zn | Zr |    |   |   |
| Al | 0 | 0                   | 0  | 0  | 0  | 0  | 0  | 0  | 0  | 0  | 1  | 0  | 0  | 0  | 3  | 1  | 0  | 0  | 0  | 0  | 0  | 0  | 0  | 0  | 3  | 13 | 1 | 0 | 0  | 0  | 0  | 0  |   |   |
| Bi | 0 | 0                   | 0  | 1  | 0  | 0  | 1  | 2  | 1  | 0  | 0  | 1  | 0  | 0  | 0  | 1  | 0  | 0  | 0  | 0  | 0  | 1  | 0  | 0  | 0  | 0  | 0 | 0 | 0  | 1  | 0  | 0  |   |   |
| Ce | 0 | 0                   | 0  | 0  | 0  | 0  | 0  | 0  | 0  | 0  | 0  | 0  | 0  | 0  | 0  | 0  | 0  | 0  | 0  | 0  | 0  | 0  | 0  | 0  | 0  | 0  | 0 | 0 | 2  | 0  | 0  | 0  |   |   |
| Cd | 0 | 0                   | 0  | 0  | 0  | 0  | 0  | 0  | 0  | 0  | 0  | 0  | 0  | 0  | 0  | 0  | 0  | 0  | 0  | 0  | 0  | 0  | 0  | 0  | 0  | 0  | 0 | 0 | 0  | 0  | 0  | 0  |   |   |
| Co | 0 | 0                   | 0  | 0  | 0  | 0  | 2  | 0  | 0  | 32 | 1  | 0  | 0  | 10 | 0  | 0  | 2  | 1  | 2  | 0  | 0  | 0  | 0  | 0  | 3  | 0  | 0 | 0 | 0  | 0  | 0  | 0  |   |   |
| Cr | 0 | 0                   | 0  | 0  | 2  | 0  | 0  | 0  | 0  | 4  | 0  | 0  | 0  | 4  | 0  | 0  | 6  | 0  | 0  | 0  | 0  | 0  | 0  | 0  | 10 | 2  | 0 | 0 | 0  | 0  | 0  | 0  |   |   |
| Cu | 0 | 0                   | 0  | 0  | 0  | 0  | 0  | 0  | 0  | 3  | 0  | 0  | 0  | 5  | 0  | 0  | 0  | 1  | 0  | 0  | 0  | 0  | 0  | 0  | 0  | 0  | 0 | 0 | 0  | 0  | 0  | 0  |   |   |
| Dy | 0 | 0                   | 0  | 0  | 0  | 0  | 0  | 0  | 0  | 0  | 0  | 0  | 0  | 0  | 0  | 0  | 0  | 0  | 0  | 0  | 0  | 0  | 0  | 0  | 0  | 0  | 0 | 0 | 0  | 0  | 0  | 0  |   |   |
| Er | 0 | 0                   | 0  | 0  | 0  | 0  | 0  | 0  | 0  | 0  | 0  | 0  | 0  | 0  | 0  | 0  | 0  | 0  | 0  | 0  | 0  | 0  | 0  | 0  | 0  | 0  | 0 | 0 | 0  | 0  | 0  | 0  |   |   |
| Fe | 0 | 0                   | 0  | 0  | 22 | 3  | 10 | 0  | 0  | 0  | 0  | 0  | 0  | 8  | 5  | 0  | 8  | 0  | 2  | 0  | 0  | 1  | 2  | 4  | 0  | 0  | 0 | 0 | 0  | 0  | 0  | 0  |   |   |
| Ga | 0 | 0                   | 0  | 0  | 0  | 0  | 0  | 0  | 0  | 0  | 0  | 0  | 8  | 3  | 0  | 0  | 0  | 0  | 0  | 0  | 0  | 0  | 0  | 0  | 0  | 0  | 0 | 0 | 0  | 0  | 0  | 0  |   |   |
| Gd | 0 | 0                   | 0  | 0  | 0  | 0  | 0  | 0  | 0  | 0  | 0  | 0  | 0  | 0  | 0  | 0  | 0  | 0  | 0  | 0  | 0  | 0  | 0  | 0  | 0  | 0  | 0 | 0 | 0  | 0  | 0  | 0  |   |   |
| Mg | 0 | 0                   | 0  | 0  | 0  | 0  | 0  | 0  | 0  | 0  | 0  | 0  | 0  | 2  | 5  | 0  | 0  | 0  | 0  | 0  | 0  | 0  | 0  | 1  | 16 | 0  | 1 | 0 | 0  | 0  | 0  | 0  |   |   |
| Mn | 2 | 0                   | 0  | 0  | 9  | 0  | 0  | 0  | 0  | 4  | 0  | 0  | 0  | 0  | 0  | 0  | 4  | 3  | 0  | 6  | 0  | 0  | 0  | 6  | 0  | 0  | 0 | 0 | 0  | 0  | 3  | 0  |   |   |
| Nb | 0 | 0                   | 0  | 0  | 0  | 0  | 0  | 0  | 0  | 4  | 0  | 0  | 0  | 0  | 0  | 0  | 0  | 0  | 0  | 0  | 0  | 0  | 0  | 0  | 6  | 0  | 0 | 0 | 0  | 0  | 0  | 0  |   |   |
| Nd | 0 | 0                   | 0  | 0  | 0  | 0  | 0  | 0  | 0  | 0  | 0  | 0  | 0  | 0  | 0  | 0  | 0  | 0  | 0  | 0  | 0  | 0  | 0  | 0  | 0  | 0  | 0 | 0 | 0  | 0  | 0  | 0  |   |   |
| Ni | 0 | 0                   | 0  | 0  | 0  | 0  | 0  | 0  | 0  | 0  | 0  | 0  | 0  | 3  | 0  | 0  | 0  | 0  | 0  | 0  | 0  | 0  | 0  | 0  | 0  | 0  | 0 | 0 | 0  | 0  | 0  | 0  |   |   |
| Ru | 0 | 0                   | 0  | 0  | 0  | 0  | 0  | 0  | 0  | 0  | 0  | 0  | 0  | 0  | 0  | 0  | 0  | 0  | 0  | 0  | 0  | 0  | 0  | 0  | 0  | 0  | 0 | 0 | 0  | 0  | 0  | 0  |   |   |
| Sb | 0 | 0                   | 0  | 0  | 0  | 0  | 0  | 0  | 0  | 0  | 0  | 0  | 0  | 0  | 0  | 0  | 0  | 0  | 0  | 0  | 0  | 0  | 0  | 0  | 0  | 0  | 0 | 0 | 0  | 0  | 0  | 0  | 0 |   |
| Sc | 0 | 0                   | 0  | 0  | 0  | 0  | 0  | 0  | 0  | 0  | 0  | 0  | 0  | 0  | 0  | 0  | 0  | 0  | 0  | 0  | 0  | 0  | 0  | 1  | 0  | 0  | 0 | 0 | 0  | 0  | 0  | 0  |   |   |
| Sm | 0 | 0                   | 0  | 0  | 0  | 0  | 0  | 0  | 0  | 0  | 0  | 0  | 0  | 0  | 0  | 0  | 0  | 0  | 0  | 0  | 0  | 0  | 0  | 0  | 0  | 0  | 0 | 0 | 0  | 0  | 0  | 0  | 0 |   |
| Sn | 0 | 0                   | 0  | 0  | 0  | 0  | 0  | 0  | 0  | 0  | 0  | 0  | 0  | 0  | 0  | 0  | 0  | 0  | 0  | 0  | 0  | 0  | 0  | 0  | 0  | 0  | 0 | 0 | 0  | 0  | 0  | 0  | 0 |   |
| Ta | 1 | 0                   | 0  | 0  | 0  | 0  | 0  | 0  | 0  | 0  | 0  | 0  | 0  | 0  | 0  | 0  | 0  | 0  | 0  | 0  | 0  | 0  | 0  | 0  | 0  | 0  | 0 | 0 | 0  | 0  | 0  | 0  | 0 |   |
| Ti | 1 | 0                   | 2  | 0  | 0  | 0  | 0  | 0  | 0  | 3  | 0  | 0  | 0  | 1  | 0  | 0  | 0  | 0  | 0  | 0  | 0  | 0  | 0  | 0  | 0  | 0  | 0 | 0 | 0  | 0  | 4  | 14 |   |   |
| V  | 0 | 0                   | 0  | 0  | 0  | 0  | 0  | 0  | 0  | 0  | 0  | 0  | 0  | 0  | 0  | 0  | 0  | 0  | 0  | 0  | 0  | 0  | 0  | 0  | 0  | 0  | 0 | 0 | 0  | 0  | 0  | 0  | 0 |   |
| W  | 0 | 0                   | 0  | 0  | 0  | 0  | 0  | 0  | 0  | 0  | 0  | 0  | 0  | 0  | 0  | 0  | 0  | 0  | 0  | 0  | 0  | 0  | 0  | 0  | 0  | 0  | 0 | 0 | 0  | 0  | 0  | 0  | 0 | 0 |
| Y  | 0 | 0                   | 0  | 0  | 0  | 0  | 0  | 0  | 0  | 0  | 0  | 0  | 0  | 0  | 0  | 0  | 0  | 0  | 0  | 0  | 0  | 0  | 0  | 0  | 0  | 0  | 0 | 0 | 0  | 0  | 0  | 0  | 0 | 0 |
| Yb | 0 | 0                   | 0  | 0  | 0  | 0  | 0  | 0  | 0  | 0  | 0  | 0  | 0  | 0  | 0  | 0  | 0  | 0  | 0  | 0  | 0  | 0  | 0  | 0  | 0  | 0  | 0 | 0 | 0  | 0  | 0  | 0  | 0 | 0 |
| Zn | 0 | 0                   | 0  | 0  | 0  | 0  | 0  | 0  | 0  | 0  | 0  | 0  | 0  | 0  | 0  | 0  | 0  | 0  | 0  | 0  | 0  | 0  | 0  | 0  | 0  | 0  | 0 | 0 | 0  | 0  | 0  | 0  | 0 | 0 |
| Zr | 0 | 0                   | 0  | 0  | 0  | 0  | 0  | 0  | 0  | 0  | 0  | 0  | 0  | 0  | 0  | 0  | 0  | 0  | 0  | 0  | 0  | 0  | 0  | 0  | 0  | 0  | 0 | 0 | 0  | 0  | 0  | 0  | 0 | 0 |

Table S5. Occurrences of B and B' combinations using AA'BB'O<sub>3</sub> compositions from the dataset used for this work, as well as compositions from the PCD and COD

|                |    | B-site Element |    |    |    |    |    |    |    |    |    |    |    |    |    |    |    |    |    |    |    |    |    |    |    |    |   |   |   |    |    |    |   |
|----------------|----|----------------|----|----|----|----|----|----|----|----|----|----|----|----|----|----|----|----|----|----|----|----|----|----|----|----|---|---|---|----|----|----|---|
|                |    | Al             | Bi | Ce | Cd | Co | Cr | Cu | Dy | Er | Fe | Ga | Gd | La | Mg | Mn | Nb | Nd | Ni | Ru | Sb | Sc | Sm | Sn | Ta | Ti | V | W | Y | Yb | Zn | Zr |   |
| A-site Element | Ba | 0              | 9  | 4  | 1  | 9  | 0  | 4  | 2  | 1  | 12 | 0  | 1  | 1  | 10 | 10 | 7  | 1  | 1  | 1  | 2  | 4  | 1  | 0  | 1  | 26 | 0 | 0 | 2 | 1  | 1  | 12 |   |
|                | Bi | 1              | 0  | 0  | 0  | 4  | 2  | 1  | 0  | 0  | 15 | 0  | 0  | 0  | 0  | 1  | 4  | 0  | 0  | 1  | 0  | 0  | 0  | 1  | 2  | 12 | 2 | 0 | 0 | 0  | 0  | 0  | 0 |

|    |    |   |   |   |    |    |    |   |   |     |    |   |   |    |    |   |   |    |   |   |   |   |   |   |    |    |   |   |   |   |    |   |   |
|----|----|---|---|---|----|----|----|---|---|-----|----|---|---|----|----|---|---|----|---|---|---|---|---|---|----|----|---|---|---|---|----|---|---|
| Ca | 2  | 1 | 0 | 0 | 0  | 11 | 1  | 0 | 0 | 0   | 3  | 0 | 0 | 0  | 6  | 3 | 2 | 0  | 1 | 2 | 0 | 0 | 0 | 0 | 0  | 22 | 0 | 0 | 0 | 0 | 4  | 0 |   |
| Ce | 2  | 0 | 0 | 0 | 1  | 0  | 0  | 0 | 0 | 2   | 0  | 0 | 0 | 0  | 2  | 2 | 0 | 1  | 0 | 0 | 0 | 0 | 0 | 0 | 0  | 2  | 0 | 0 | 0 | 0 | 0  | 0 |   |
| Dy | 0  | 0 | 0 | 0 | 1  | 0  | 0  | 0 | 0 | 1   | 0  | 0 | 0 | 0  | 0  | 0 | 0 | 0  | 0 | 0 | 0 | 0 | 0 | 0 | 0  | 0  | 0 | 0 | 0 | 0 | 0  | 0 |   |
| Eu | 0  | 0 | 0 | 0 | 0  | 0  | 0  | 0 | 0 | 0   | 0  | 0 | 0 | 0  | 0  | 0 | 0 | 0  | 0 | 0 | 0 | 0 | 0 | 0 | 1  | 0  | 0 | 0 | 0 | 1 | 0  |   |   |
| Er | 0  | 0 | 0 | 0 | 1  | 0  | 0  | 0 | 0 | 1   | 0  | 0 | 0 | 0  | 0  | 0 | 0 | 0  | 0 | 0 | 0 | 0 | 0 | 0 | 0  | 0  | 0 | 0 | 0 | 0 | 0  | 0 |   |
| Gd | 0  | 0 | 0 | 0 | 2  | 0  | 0  | 0 | 0 | 1   | 0  | 0 | 0 | 0  | 1  | 0 | 0 | 0  | 0 | 0 | 0 | 0 | 0 | 0 | 0  | 0  | 0 | 0 | 0 | 0 | 0  | 0 |   |
| K  | 0  | 9 | 0 | 1 | 0  | 0  | 0  | 2 | 1 | 0   | 0  | 1 | 1 | 0  | 0  | 0 | 1 | 0  | 0 | 0 | 0 | 1 | 0 | 0 | 0  | 0  | 0 | 0 | 0 | 1 | 0  | 0 |   |
| La | 15 | 0 | 2 | 0 | 47 | 25 | 11 | 0 | 0 | 56  | 11 | 0 | 0 | 28 | 59 | 3 | 0 | 21 | 2 | 2 | 6 | 0 | 0 | 3 | 44 | 0  | 1 | 2 | 0 | 4 | 0  |   |   |
| Li | 7  | 0 | 0 | 0 | 0  | 0  | 0  | 0 | 0 | 4   | 0  | 0 | 0 | 0  | 0  | 4 | 0 | 0  | 0 | 0 | 0 | 0 | 0 | 1 | 6  | 0  | 0 | 0 | 0 | 0 | 0  | 0 |   |
| Mn | 0  | 0 | 0 | 0 | 0  | 0  | 0  | 0 | 0 | 4   | 0  | 0 | 0 | 0  | 0  | 4 | 0 | 0  | 0 | 0 | 0 | 0 | 0 | 0 | 0  | 0  | 0 | 0 | 0 | 0 | 0  | 0 |   |
| Na | 0  | 0 | 0 | 0 | 0  | 0  | 0  | 0 | 0 | 0   | 0  | 0 | 0 | 1  | 0  | 6 | 0 | 0  | 0 | 0 | 0 | 0 | 0 | 0 | 6  | 0  | 1 | 0 | 0 | 0 | 0  | 0 |   |
| Nd | 4  | 0 | 0 | 0 | 2  | 1  | 6  | 0 | 0 | 7   | 0  | 0 | 0 | 1  | 5  | 1 | 0 | 0  | 2 | 0 | 0 | 0 | 0 | 1 | 3  | 0  | 0 | 0 | 0 | 1 | 0  | 0 |   |
| Pb | 3  | 0 | 0 | 0 | 2  | 2  | 0  | 0 | 0 | 5   | 0  | 0 | 0 | 4  | 5  | 4 | 0 | 1  | 0 | 0 | 1 | 0 | 0 | 1 | 12 | 2  | 0 | 0 | 0 | 0 | 0  | 6 | 0 |
| Pr | 2  | 0 | 0 | 0 | 8  | 0  | 1  | 0 | 0 | 8   | 0  | 0 | 0 | 0  | 2  | 0 | 0 | 1  | 0 | 0 | 0 | 0 | 0 | 0 | 3  | 0  | 0 | 0 | 0 | 1 | 0  | 0 |   |
| Sm | 0  | 0 | 0 | 0 | 12 | 3  | 1  | 0 | 0 | 10  | 0  | 0 | 0 | 0  | 6  | 0 | 0 | 0  | 0 | 0 | 0 | 0 | 0 | 0 | 0  | 0  | 0 | 0 | 0 | 0 | 0  | 0 |   |
| Sr | 15 | 1 | 2 | 0 | 81 | 18 | 19 | 0 | 0 | 102 | 12 | 0 | 0 | 16 | 58 | 5 | 0 | 20 | 2 | 4 | 3 | 0 | 1 | 7 | 29 | 1  | 0 | 0 | 0 | 2 | 10 | 0 |   |
| Y  | 1  | 0 | 0 | 0 | 2  | 0  | 0  | 0 | 0 | 1   | 1  | 0 | 0 | 0  | 0  | 0 | 0 | 0  | 0 | 0 | 0 | 0 | 0 | 0 | 0  | 1  | 0 | 0 | 0 | 0 | 0  | 0 |   |

Table S6. Occurrences of A and B combinations using AA'BB'O<sub>3</sub> compositions from the dataset used for this work, as well as compositions from the PCD and COD

| Actual                                                                             | Predicted                                                                            |                                                    | RMS E |
|------------------------------------------------------------------------------------|--------------------------------------------------------------------------------------|----------------------------------------------------|-------|
| 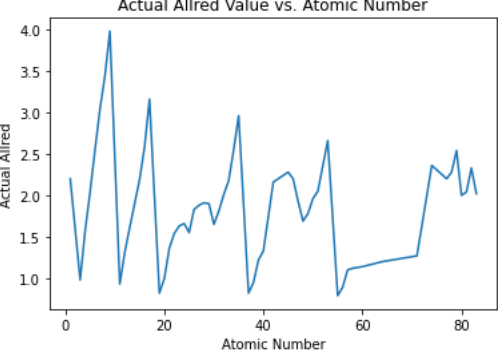 |  | svcclassifier =<br>SVR(kernel='poly',<br>degree=3) | 28.07 |



|                                                                                                                                 |                                                                                                                                                        |                                                                                                                                                                                                                                    |       |
|---------------------------------------------------------------------------------------------------------------------------------|--------------------------------------------------------------------------------------------------------------------------------------------------------|------------------------------------------------------------------------------------------------------------------------------------------------------------------------------------------------------------------------------------|-------|
| <p>Actual Allred Value vs. Atomic Number</p> 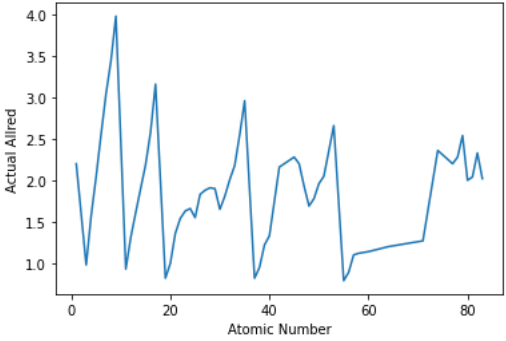   | <p>Predicted Allred Value of 83 Elements vs. Atomic Number</p>       | <p>svclassifier =<br/>SVR(kernel='poly',<br/>degree=6)</p>                                                                                                                                                                         | 27.99 |
| <p>Actual Allred Value vs. Atomic Number</p>    | <p>Predicted Allred Value of 83 Elements vs. Atomic Number</p>       | <p>svclassifier =<br/>SVR(kernel='linear')</p>                                                                                                                                                                                     | 28.07 |
| <p>Actual Allred Value vs. Atomic Number</p>  | <p>Predicted Allred Value of 83 Elements vs. Atomic Number</p>     | <p>svclassifier =<br/>SVR(kernel='rbf')</p>                                                                                                                                                                                        | 29.15 |
| <p>Actual Allred Value vs. Atomic Number</p>  | <p>DT Predicted Allred Value of 83 Elements vs. Atomic Number</p>  | <p>DTreg =<br/>tree.DecisionTreeRegressor()<br/><br/>DTreg = DTreg.fit(X, y)<br/><br/>*While the shape looks great, each missing value is identical to the value of its previous' element. It is not so useful. For example, H</p> | 0.0   |

|                                                                                                                                 |                                                                                                                                                                |                                                                                                                                                            |          |
|---------------------------------------------------------------------------------------------------------------------------------|----------------------------------------------------------------------------------------------------------------------------------------------------------------|------------------------------------------------------------------------------------------------------------------------------------------------------------|----------|
|                                                                                                                                 |                                                                                                                                                                | has 2.2, and He (missing) also 2.2.                                                                                                                        |          |
| 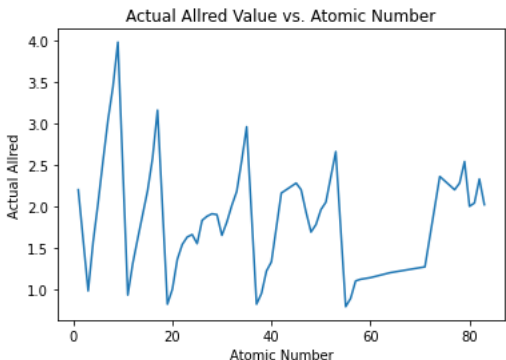 <p>Actual Allred Value vs. Atomic Number</p>   |  <p>NN Predicted Allred Value of 83 Elements vs. Atomic Number</p>           | $\alpha\_value = 0.001$<br>$max\_iter = 10000$<br>$idden\_layer\_sizes=(100, 10)$<br>$solver= 'lbfgs'$                                                     | 0.63     |
|  <p>Actual Allred Value vs. Atomic Number</p>  |  <p>CubicSpline Predicted Allred Value of 83 Elements vs. Atomic Number</p> | $degree = 5$<br>$clf =$<br>$make\_pipeline(PolynomialFeatures(degree), Ridge(alpha=1e-3))$                                                                 | 0.61     |
|  <p>Actual Allred Value vs. Atomic Number</p> |  <p>Gaussian Predicted Allred Value of 83 Elements vs. Atomic Number</p>   | $kernel = C(1.0, (1e-3, 1e3)) * RBF(10, (1e-2, 1e2))$<br>$clf =$<br>$GaussianProcessRegressor(kernel=kernel, n\_restarts\_optimizer=9)$<br>$clf.fit(X, y)$ | 6.78e-10 |

Table S7. Comparison of the models used to predict the Allred electronegativity values for elements with a missing value
