# Supplementary material for: Machine-learning prediction of thermal expansion coefficient for perovskite oxides with experimental validation
Source: Royal Society of Chemistry journal article supplement (doi:10.1039/d3cp04017h), 2023-01-01
Supplement: d3cp04017h3.xlsx [file d3cp04017h3.xlsx]

## Sheet: Sheet1
Composition	Default SVM Prediction
Ba0.2Ca0.8Al0.25Co0.75O3	13.9948
Ba0.2Ca0.8Al0.3Co0.7O3	13.9725
Ba0.2Ca0.8Al0.4Co0.6O3	13.9275
Ba0.2Ca0.8Al0.5Co0.5O3	13.8846
Ba0.2Ca0.8Al0.6Co0.4O3	13.8476
Ba0.2Ca0.8Al0.7Co0.3O3	13.8195
Ba0.2Ca0.8Al0.75Co0.25O3	13.8094
Ba0.2Ca0.8Al0.8Co0.2O3	13.8023
Ba0.2Ca0.8Al0.2Cr0.8O3	13.9066
Ba0.2Ca0.8Al0.25Cr0.75O3	13.8847
Ba0.2Ca0.8Al0.3Cr0.7O3	13.8631
Ba0.2Ca0.8Al0.4Cr0.6O3	13.8221
Ba0.2Ca0.8Al0.5Cr0.5O3	13.7867
Ba0.2Ca0.8Al0.6Cr0.4O3	13.7597
Ba0.2Ca0.8Al0.7Cr0.3O3	13.7431
Ba0.2Ca0.8Al0.75Cr0.25O3	13.7391
Ba0.2Ca0.8Al0.8Cr0.2O3	13.7381
Ba0.2Ca0.8Al0.4Cu0.6O3	13.974
Ba0.2Ca0.8Al0.5Cu0.5O3	13.9237
Ba0.2Ca0.8Al0.6Cu0.4O3	13.8762
Ba0.2Ca0.8Al0.7Cu0.3O3	13.8372
Ba0.2Ca0.8Al0.75Cu0.25O3	13.8223
Ba0.2Ca0.8Al0.8Cu0.2O3	13.8111
Ba0.2Ca0.8Al0.2Fe0.8O3	13.9321
Ba0.2Ca0.8Al0.25Fe0.75O3	13.9113
Ba0.2Ca0.8Al0.3Fe0.7O3	13.8905
Ba0.2Ca0.8Al0.4Fe0.6O3	13.8506
Ba0.2Ca0.8Al0.5Fe0.5O3	13.8152
Ba0.2Ca0.8Al0.6Fe0.4O3	13.7871
Ba0.2Ca0.8Al0.7Fe0.3O3	13.7685
Ba0.2Ca0.8Al0.75Fe0.25O3	13.7632
Ba0.2Ca0.8Al0.8Fe0.2O3	13.7606
Ba0.2Ca0.8Al0.2Ga0.8O3	13.9758
Ba0.2Ca0.8Al0.25Ga0.75O3	13.9591
Ba0.2Ca0.8Al0.3Ga0.7O3	13.9421
Ba0.2Ca0.8Al0.4Ga0.6O3	13.9083
Ba0.2Ca0.8Al0.5Ga0.5O3	13.8776
Ba0.2Ca0.8Al0.6Ga0.4O3	13.8525
Ba0.2Ca0.8Al0.7Ga0.3O3	13.8354
Ba0.2Ca0.8Al0.75Ga0.25O3	13.8304
Ba0.2Ca0.8Al0.8Ga0.2O3	13.8278
Ba0.2Ca0.8Al0.2Mg0.8O3	13.8746
Ba0.2Ca0.8Al0.25Mg0.75O3	13.8623
Ba0.2Ca0.8Al0.3Mg0.7O3	13.8505
Ba0.2Ca0.8Al0.4Mg0.6O3	13.8296
Ba0.2Ca0.8Al0.5Mg0.5O3	13.8133
Ba0.2Ca0.8Al0.6Mg0.4O3	13.8027
Ba0.2Ca0.8Al0.7Mg0.3O3	13.7985
Ba0.2Ca0.8Al0.75Mg0.25O3	13.7988
Ba0.2Ca0.8Al0.8Mg0.2O3	13.8008
Ba0.2Ca0.8Al0.2Mn0.8O3	13.8173
Ba0.2Ca0.8Al0.25Mn0.75O3	13.7992
Ba0.2Ca0.8Al0.3Mn0.7O3	13.7821
Ba0.2Ca0.8Al0.4Mn0.6O3	13.7517
Ba0.2Ca0.8Al0.5Mn0.5O3	13.7286
Ba0.2Ca0.8Al0.6Mn0.4O3	13.7144
Ba0.2Ca0.8Al0.7Mn0.3O3	13.7102
Ba0.2Ca0.8Al0.75Mn0.25O3	13.7119
Ba0.2Ca0.8Al0.8Mn0.2O3	13.7162
Ba0.2Ca0.8Al0.5Nb0.5O3	13.9914
Ba0.2Ca0.8Al0.6Nb0.4O3	13.9477
Ba0.2Ca0.8Al0.7Nb0.3O3	13.9078
Ba0.2Ca0.8Al0.75Nb0.25O3	13.892
Ba0.2Ca0.8Al0.8Nb0.2O3	13.8801
Ba0.2Ca0.8Al0.2Ni0.8O3	13.9996
Ba0.2Ca0.8Al0.25Ni0.75O3	13.9767
Ba0.2Ca0.8Al0.3Ni0.7O3	13.9529
Ba0.2Ca0.8Al0.4Ni0.6O3	13.9046
Ba0.2Ca0.8Al0.5Ni0.5O3	13.8588
Ba0.2Ca0.8Al0.6Ni0.4O3	13.8197
Ba0.2Ca0.8Al0.7Ni0.3O3	13.7907
Ba0.2Ca0.8Al0.75Ni0.25O3	13.7808
Ba0.2Ca0.8Al0.8Ni0.2O3	13.7742
Ba0.2Ca0.8Al0.75Sb0.25O3	13.9959
Ba0.2Ca0.8Al0.8Sb0.2O3	13.9813
Ba0.2Ca0.8Al0.7Sn0.3O3	13.9796
Ba0.2Ca0.8Al0.75Sn0.25O3	13.9583
Ba0.2Ca0.8Al0.8Sn0.2O3	13.9395
Ba0.2Ca0.8Al0.2Ti0.8O3	13.8893
Ba0.2Ca0.8Al0.25Ti0.75O3	13.8723
Ba0.2Ca0.8Al0.3Ti0.7O3	13.8558
Ba0.2Ca0.8Al0.4Ti0.6O3	13.8257
Ba0.2Ca0.8Al0.5Ti0.5O3	13.8011
Ba0.2Ca0.8Al0.6Ti0.4O3	13.7837
Ba0.2Ca0.8Al0.7Ti0.3O3	13.7749
Ba0.2Ca0.8Al0.75Ti0.25O3	13.7738
Ba0.2Ca0.8Al0.8Ti0.2O3	13.775
Ba0.2Ca0.8Co0.2Cr0.8O3	14.968
Ba0.2Ca0.8Co0.25Cr0.75O3	14.9063
Ba0.2Ca0.8Co0.3Cr0.7O3	14.8338
Ba0.2Ca0.8Co0.4Cr0.6O3	14.6631
Ba0.2Ca0.8Co0.5Cr0.5O3	14.4713
Ba0.2Ca0.8Co0.6Cr0.4O3	14.2764
Ba0.2Ca0.8Co0.8Cr0.2O3	13.9463
Ba0.2Ca0.8Co0.2Cu0.8O3	15.3582
Ba0.2Ca0.8Co0.25Cu0.75O3	15.3572
Ba0.2Ca0.8Co0.3Cu0.7O3	15.3352
Ba0.2Ca0.8Co0.4Cu0.6O3	15.2289
Ba0.2Ca0.8Co0.5Cu0.5O3	15.0497
Ba0.2Ca0.8Co0.6Cu0.4O3	14.8208
Ba0.2Ca0.8Co0.7Cu0.3O3	14.5731
Ba0.2Ca0.8Co0.75Cu0.25O3	14.4525
Ba0.2Ca0.8Co0.8Cu0.2O3	14.339
Ba0.2Ca0.8Co0.2Fe0.8O3	15.3644
Ba0.2Ca0.8Co0.25Fe0.75O3	15.322
Ba0.2Ca0.8Co0.3Fe0.7O3	15.2655
Ba0.2Ca0.8Co0.4Fe0.6O3	15.1148
Ba0.2Ca0.8Co0.5Fe0.5O3	14.9249
Ba0.2Ca0.8Co0.6Fe0.4O3	14.7131
Ba0.2Ca0.8Co0.7Fe0.3O3	14.4986
Ba0.2Ca0.8Co0.75Fe0.25O3	14.3963
Ba0.2Ca0.8Co0.8Fe0.2O3	14.3001
Ba0.2Ca0.8Co0.2Ga0.8O3	15.0177
Ba0.2Ca0.8Co0.25Ga0.75O3	14.9991
Ba0.2Ca0.8Co0.3Ga0.7O3	14.9686
Ba0.2Ca0.8Co0.4Ga0.6O3	14.8746
Ba0.2Ca0.8Co0.5Ga0.5O3	14.7445
Ba0.2Ca0.8Co0.6Ga0.4O3	14.592
Ba0.2Ca0.8Co0.7Ga0.3O3	14.4333
Ba0.2Ca0.8Co0.75Ga0.25O3	14.3567
Ba0.2Ca0.8Co0.8Ga0.2O3	14.2844
Ba0.2Ca0.8Co0.2Mg0.8O3	14.3684
Ba0.2Ca0.8Co0.25Mg0.75O3	14.34
Ba0.2Ca0.8Co0.3Mg0.7O3	14.3074
Ba0.2Ca0.8Co0.4Mg0.6O3	14.2321
Ba0.2Ca0.8Co0.5Mg0.5O3	14.1482
Ba0.2Ca0.8Co0.7Mg0.3O3	13.9834
Ba0.2Ca0.8Co0.75Mg0.25O3	13.9478
Ba0.2Ca0.8Co0.8Mg0.2O3	13.916
Ba0.2Ca0.8Co0.2Mn0.8O3	14.7259
Ba0.2Ca0.8Co0.25Mn0.75O3	14.6981
Ba0.2Ca0.8Co0.3Mn0.7O3	14.6623
Ba0.2Ca0.8Co0.4Mn0.6O3	14.5696
Ba0.2Ca0.8Co0.5Mn0.5O3	14.4554
Ba0.2Ca0.8Co0.6Mn0.4O3	14.33
Ba0.2Ca0.8Co0.7Mn0.3O3	14.205
Ba0.2Ca0.8Co0.75Mn0.25O3	14.1462
Ba0.2Ca0.8Co0.2Nb0.8O3	14.7267
Ba0.2Ca0.8Co0.25Nb0.75O3	14.8057
Ba0.2Ca0.8Co0.3Nb0.7O3	14.8771
Ba0.2Ca0.8Co0.4Nb0.6O3	14.9826
Ba0.2Ca0.8Co0.5Nb0.5O3	15.0184
Ba0.2Ca0.8Co0.6Nb0.4O3	14.9753
Ba0.2Ca0.8Co0.7Nb0.3O3	14.8639
Ba0.2Ca0.8Co0.75Nb0.25O3	14.7905
Ba0.2Ca0.8Co0.8Nb0.2O3	14.7109
Ba0.2Ca0.8Co0.2Ni0.8O3	15.5084
Ba0.2Ca0.8Co0.25Ni0.75O3	15.4616
Ba0.2Ca0.8Co0.3Ni0.7O3	15.3966
Ba0.2Ca0.8Co0.4Ni0.6O3	15.2174
Ba0.2Ca0.8Co0.5Ni0.5O3	14.988
Ba0.2Ca0.8Co0.6Ni0.4O3	14.732
Ba0.2Ca0.8Co0.7Ni0.3O3	14.476
Ba0.2Ca0.8Co0.75Ni0.25O3	14.3558
Ba0.2Ca0.8Co0.8Ni0.2O3	14.2445
Ba0.2Ca0.8Co0.2Sb0.8O3	14.1639
Ba0.2Ca0.8Co0.25Sb0.75O3	14.2115
Ba0.2Ca0.8Co0.3Sb0.7O3	14.2742
Ba0.2Ca0.8Co0.4Sb0.6O3	14.4479
Ba0.2Ca0.8Co0.5Sb0.5O3	14.6734
Ba0.2Ca0.8Co0.6Sb0.4O3	14.9082
Ba0.2Ca0.8Co0.7Sb0.3O3	15.0893
Ba0.2Ca0.8Co0.75Sb0.25O3	15.1413
Ba0.2Ca0.8Co0.8Sb0.2O3	15.1616
Ba0.2Ca0.8Co0.2Sn0.8O3	14.2067
Ba0.2Ca0.8Co0.25Sn0.75O3	14.2655
Ba0.2Ca0.8Co0.3Sn0.7O3	14.339
Ba0.2Ca0.8Co0.4Sn0.6O3	14.5261
Ba0.2Ca0.8Co0.5Sn0.5O3	14.7411
Ba0.2Ca0.8Co0.6Sn0.4O3	14.9308
Ba0.2Ca0.8Co0.7Sn0.3O3	15.0366
Ba0.2Ca0.8Co0.75Sn0.25O3	15.0461
Ba0.2Ca0.8Co0.8Sn0.2O3	15.0255
Ba0.2Ca0.8Co0.7Ta0.3O3	14.1143
Ba0.2Ca0.8Co0.75Ta0.25O3	14.1745
Ba0.2Ca0.8Co0.8Ta0.2O3	14.2725
Ba0.2Ca0.8Co0.2Ti0.8O3	14.8722
Ba0.2Ca0.8Co0.25Ti0.75O3	14.8339
Ba0.2Ca0.8Co0.3Ti0.7O3	14.7874
Ba0.2Ca0.8Co0.4Ti0.6O3	14.6736
Ba0.2Ca0.8Co0.5Ti0.5O3	14.5405
Ba0.2Ca0.8Co0.6Ti0.4O3	14.4001
Ba0.2Ca0.8Co0.7Ti0.3O3	14.2647
Ba0.2Ca0.8Co0.75Ti0.25O3	14.2025
Ba0.2Ca0.8Co0.8Ti0.2O3	14.1454
Ba0.2Ca0.8Cr0.2Cu0.8O3	15.0475
Ba0.2Ca0.8Cr0.25Cu0.75O3	15.0234
Ba0.2Ca0.8Cr0.3Cu0.7O3	14.9794
Ba0.2Ca0.8Cr0.4Cu0.6O3	14.8342
Ba0.2Ca0.8Cr0.5Cu0.5O3	14.6237
Ba0.2Ca0.8Cr0.6Cu0.4O3	14.3716
Ba0.2Ca0.8Cr0.7Cu0.3O3	14.1097
Ba0.2Ca0.8Cr0.75Cu0.25O3	13.9853
Ba0.2Ca0.8Cr0.8Cu0.2O3	13.8706
Ba0.2Ca0.8Cr0.2Fe0.8O3	14.9245
Ba0.2Ca0.8Cr0.25Fe0.75O3	14.8612
Ba0.2Ca0.8Cr0.3Fe0.7O3	14.7859
Ba0.2Ca0.8Cr0.4Fe0.6O3	14.605
Ba0.2Ca0.8Cr0.5Fe0.5O3	14.3952
Ba0.2Ca0.8Cr0.6Fe0.4O3	14.1742
Ba0.2Ca0.8Cr0.7Fe0.3O3	13.9607
Ba0.2Ca0.8Cr0.75Fe0.25O3	13.8625
Ba0.2Ca0.8Cr0.8Fe0.2O3	13.7726
Ba0.2Ca0.8Cr0.2Ga0.8O3	14.7133
Ba0.2Ca0.8Cr0.25Ga0.75O3	14.6768
Ba0.2Ca0.8Cr0.3Ga0.7O3	14.6298
Ba0.2Ca0.8Cr0.4Ga0.6O3	14.5076
Ba0.2Ca0.8Cr0.5Ga0.5O3	14.3566
Ba0.2Ca0.8Cr0.6Ga0.4O3	14.1911
Ba0.2Ca0.8Cr0.75Ga0.25O3	13.9517
Ba0.2Ca0.8Cr0.8Ga0.2O3	13.8821
Ba0.2Ca0.8Cr0.2Mg0.8O3	14.1301
Ba0.2Ca0.8Cr0.4Mg0.6O3	13.9522
Ba0.2Ca0.8Cr0.5Mg0.5O3	13.8535
Ba0.2Ca0.8Cr0.6Mg0.4O3	13.7575
Ba0.2Ca0.8Cr0.7Mg0.3O3	13.6717
Ba0.2Ca0.8Cr0.75Mg0.25O3	13.6347
Ba0.2Ca0.8Cr0.8Mg0.2O3	13.6026
Ba0.2Ca0.8Cr0.2Mn0.8O3	14.3611
Ba0.2Ca0.8Cr0.25Mn0.75O3	14.3131
Ba0.2Ca0.8Cr0.3Mn0.7O3	14.2586
Ba0.2Ca0.8Cr0.4Mn0.6O3	14.1332
Ba0.2Ca0.8Cr0.5Mn0.5O3	13.9939
Ba0.2Ca0.8Cr0.6Mn0.4O3	13.8521
Ba0.2Ca0.8Cr0.7Mn0.3O3	13.72
Ba0.2Ca0.8Cr0.75Mn0.25O3	13.6612
Ba0.2Ca0.8Cr0.8Mn0.2O3	13.6089
Ba0.2Ca0.8Cr0.2Nb0.8O3	14.5829
Ba0.2Ca0.8Cr0.25Nb0.75O3	14.6344
Ba0.2Ca0.8Cr0.3Nb0.7O3	14.6762
Ba0.2Ca0.8Cr0.4Nb0.6O3	14.7172
Ba0.2Ca0.8Cr0.5Nb0.5O3	14.6864
Ba0.2Ca0.8Cr0.6Nb0.4O3	14.5816
Ba0.2Ca0.8Cr0.7Nb0.3O3	14.4214
Ba0.2Ca0.8Cr0.75Nb0.25O3	14.3311
Ba0.2Ca0.8Cr0.8Nb0.2O3	14.2406
Ba0.2Ca0.8Cr0.2Ni0.8O3	15.0911
Ba0.2Ca0.8Cr0.25Ni0.75O3	15.0252
Ba0.2Ca0.8Cr0.3Ni0.7O3	14.9432
Ba0.2Ca0.8Cr0.4Ni0.6O3	14.7372
Ba0.2Ca0.8Cr0.5Ni0.5O3	14.4905
Ba0.2Ca0.8Cr0.6Ni0.4O3	14.2263
Ba0.2Ca0.8Cr0.7Ni0.3O3	13.9703
Ba0.2Ca0.8Cr0.75Ni0.25O3	13.8532
Ba0.2Ca0.8Cr0.8Ni0.2O3	13.7467
Ba0.2Ca0.8Cr0.2Sb0.8O3	14.1445
Ba0.2Ca0.8Cr0.25Sb0.75O3	14.1814
Ba0.2Ca0.8Cr0.3Sb0.7O3	14.2289
Ba0.2Ca0.8Cr0.4Sb0.6O3	14.3545
Ba0.2Ca0.8Cr0.5Sb0.5O3	14.5027
Ba0.2Ca0.8Cr0.6Sb0.4O3	14.6319
Ba0.2Ca0.8Cr0.7Sb0.3O3	14.6948
Ba0.2Ca0.8Cr0.75Sb0.25O3	14.6923
Ba0.2Ca0.8Cr0.8Sb0.2O3	14.6673
Ba0.2Ca0.8Cr0.2Sn0.8O3	14.1787
Ba0.2Ca0.8Cr0.25Sn0.75O3	14.2239
Ba0.2Ca0.8Cr0.3Sn0.7O3	14.2791
Ba0.2Ca0.8Cr0.4Sn0.6O3	14.4116
Ba0.2Ca0.8Cr0.5Sn0.5O3	14.5454
Ba0.2Ca0.8Cr0.6Sn0.4O3	14.6316
Ba0.2Ca0.8Cr0.7Sn0.3O3	14.6281
Ba0.2Ca0.8Cr0.75Sn0.25O3	14.5891
Ba0.2Ca0.8Cr0.8Sn0.2O3	14.5294
Ba0.2Ca0.8Cr0.7Ta0.3O3	14.1001
Ba0.2Ca0.8Cr0.75Ta0.25O3	14.1397
Ba0.2Ca0.8Cr0.8Ta0.2O3	14.201
Ba0.2Ca0.8Cr0.2Ti0.8O3	14.5338
Ba0.2Ca0.8Cr0.25Ti0.75O3	14.4799
Ba0.2Ca0.8Cr0.3Ti0.7O3	14.4191
Ba0.2Ca0.8Cr0.4Ti0.6O3	14.2811
Ba0.2Ca0.8Cr0.5Ti0.5O3	14.1302
Ba0.2Ca0.8Cr0.6Ti0.4O3	13.9786
Ba0.2Ca0.8Cr0.7Ti0.3O3	13.8387
Ba0.2Ca0.8Cr0.75Ti0.25O3	13.7767
Ba0.2Ca0.8Cr0.8Ti0.2O3	13.7215
Ba0.2Ca0.8Cu0.2Fe0.8O3	14.9574
Ba0.2Ca0.8Cu0.25Fe0.75O3	14.9401
Ba0.2Ca0.8Cu0.3Fe0.7O3	14.9133
Ba0.2Ca0.8Cu0.4Fe0.6O3	14.8348
Ba0.2Ca0.8Cu0.5Fe0.5O3	14.731
Ba0.2Ca0.8Cu0.6Fe0.4O3	14.6138
Ba0.2Ca0.8Cu0.7Fe0.3O3	14.4955
Ba0.2Ca0.8Cu0.75Fe0.25O3	14.4393
Ba0.2Ca0.8Cu0.8Fe0.2O3	14.3866
Ba0.2Ca0.8Cu0.2Ga0.8O3	14.7165
Ba0.2Ca0.8Cu0.25Ga0.75O3	14.711
Ba0.2Ca0.8Cu0.3Ga0.7O3	14.6979
Ba0.2Ca0.8Cu0.4Ga0.6O3	14.6507
Ba0.2Ca0.8Cu0.5Ga0.5O3	14.5816
Ba0.2Ca0.8Cu0.6Ga0.4O3	14.4995
Ba0.2Ca0.8Cu0.7Ga0.3O3	14.4143
Ba0.2Ca0.8Cu0.75Ga0.25O3	14.3733
Ba0.2Ca0.8Cu0.8Ga0.2O3	14.3345
Ba0.2Ca0.8Cu0.2Mg0.8O3	14.2629
Ba0.2Ca0.8Cu0.25Mg0.75O3	14.2515
Ba0.2Ca0.8Cu0.3Mg0.7O3	14.2381
Ba0.2Ca0.8Cu0.4Mg0.6O3	14.2068
Ba0.2Ca0.8Cu0.5Mg0.5O3	14.1728
Ba0.2Ca0.8Cu0.6Mg0.4O3	14.1399
Ba0.2Ca0.8Cu0.7Mg0.3O3	14.1113
Ba0.2Ca0.8Cu0.2Mn0.8O3	14.4949
Ba0.2Ca0.8Cu0.25Mn0.75O3	14.4883
Ba0.2Ca0.8Cu0.3Mn0.7O3	14.4776
Ba0.2Ca0.8Cu0.4Mn0.6O3	14.4448
Ba0.2Ca0.8Cu0.5Mn0.5O3	14.4005
Ba0.2Ca0.8Cu0.6Mn0.4O3	14.3496
Ba0.2Ca0.8Cu0.7Mn0.3O3	14.2974
Ba0.2Ca0.8Cu0.75Mn0.25O3	14.2724
Ba0.2Ca0.8Cu0.8Mn0.2O3	14.2488
Ba0.2Ca0.8Cu0.2Nb0.8O3	14.5048
Ba0.2Ca0.8Cu0.25Nb0.75O3	14.5592
Ba0.2Ca0.8Cu0.3Nb0.7O3	14.6094
Ba0.2Ca0.8Cu0.4Nb0.6O3	14.6884
Ba0.2Ca0.8Cu0.5Nb0.5O3	14.7275
Ba0.2Ca0.8Cu0.6Nb0.4O3	14.7208
Ba0.2Ca0.8Cu0.7Nb0.3O3	14.6725
Ba0.2Ca0.8Cu0.75Nb0.25O3	14.6362
Ba0.2Ca0.8Cu0.8Nb0.2O3	14.5943
Ba0.2Ca0.8Cu0.2Ni0.8O3	15.0591
Ba0.2Ca0.8Cu0.25Ni0.75O3	15.0344
Ba0.2Ca0.8Cu0.3Ni0.7O3	14.9975
Ba0.2Ca0.8Cu0.4Ni0.6O3	14.8924
Ba0.2Ca0.8Cu0.5Ni0.5O3	14.7578
Ba0.2Ca0.8Cu0.6Ni0.4O3	14.6108
Ba0.2Ca0.8Cu0.7Ni0.3O3	14.4686
Ba0.2Ca0.8Cu0.75Ni0.25O3	14.4037
Ba0.2Ca0.8Cu0.8Ni0.2O3	14.3446
Ba0.2Ca0.8Cu0.2Sb0.8O3	14.1318
Ba0.2Ca0.8Cu0.25Sb0.75O3	14.1641
Ba0.2Ca0.8Cu0.3Sb0.7O3	14.2068
Ba0.2Ca0.8Cu0.4Sb0.6O3	14.3264
Ba0.2Ca0.8Cu0.5Sb0.5O3	14.4857
Ba0.2Ca0.8Cu0.6Sb0.4O3	14.6585
Ba0.2Ca0.8Cu0.7Sb0.3O3	14.8004
Ba0.2Ca0.8Cu0.75Sb0.25O3	14.8447
Ba0.2Ca0.8Cu0.8Sb0.2O3	14.8652
Ba0.2Ca0.8Cu0.2Sn0.8O3	14.1601
Ba0.2Ca0.8Cu0.25Sn0.75O3	14.1996
Ba0.2Ca0.8Cu0.3Sn0.7O3	14.2493
Ba0.2Ca0.8Cu0.4Sn0.6O3	14.377
Ba0.2Ca0.8Cu0.5Sn0.5O3	14.5284
Ba0.2Ca0.8Cu0.6Sn0.4O3	14.6711
Ba0.2Ca0.8Cu0.7Sn0.3O3	14.7656
Ba0.2Ca0.8Cu0.75Sn0.25O3	14.7847
Ba0.2Ca0.8Cu0.8Sn0.2O3	14.7824
Ba0.2Ca0.8Cu0.75Ta0.25O3	14.137
Ba0.2Ca0.8Cu0.8Ta0.2O3	14.2038
Ba0.2Ca0.8Cu0.2Ti0.8O3	14.6084
Ba0.2Ca0.8Cu0.25Ti0.75O3	14.5926
Ba0.2Ca0.8Cu0.3Ti0.7O3	14.572
Ba0.2Ca0.8Cu0.4Ti0.6O3	14.5185
Ba0.2Ca0.8Cu0.5Ti0.5O3	14.4544
Ba0.2Ca0.8Cu0.6Ti0.4O3	14.3866
Ba0.2Ca0.8Cu0.7Ti0.3O3	14.3218
Ba0.2Ca0.8Cu0.75Ti0.25O3	14.2921
Ba0.2Ca0.8Cu0.8Ti0.2O3	14.2648
Ba0.2Ca0.8Fe0.2Ga0.8O3	14.9228
Ba0.2Ca0.8Fe0.25Ga0.75O3	14.878
Ba0.2Ca0.8Fe0.3Ga0.7O3	14.8197
Ba0.2Ca0.8Fe0.4Ga0.6O3	14.6666
Ba0.2Ca0.8Fe0.5Ga0.5O3	14.4769
Ba0.2Ca0.8Fe0.6Ga0.4O3	14.2691
Ba0.2Ca0.8Fe0.75Ga0.25O3	13.9701
Ba0.2Ca0.8Fe0.8Ga0.2O3	13.8837
Ba0.2Ca0.8Fe0.2Mg0.8O3	14.2241
Ba0.2Ca0.8Fe0.25Mg0.75O3	14.1743
Ba0.2Ca0.8Fe0.3Mg0.7O3	14.1199
Ba0.2Ca0.8Fe0.5Mg0.5O3	13.8738
Ba0.2Ca0.8Fe0.6Mg0.4O3	13.7499
Ba0.2Ca0.8Fe0.7Mg0.3O3	13.6386
Ba0.2Ca0.8Fe0.75Mg0.25O3	13.5904
Ba0.2Ca0.8Fe0.8Mg0.2O3	13.5484
Ba0.2Ca0.8Fe0.2Mn0.8O3	14.568
Ba0.2Ca0.8Fe0.25Mn0.75O3	14.5088
Ba0.2Ca0.8Fe0.3Mn0.7O3	14.4403
Ba0.2Ca0.8Fe0.4Mn0.6O3	14.2805
Ba0.2Ca0.8Fe0.5Mn0.5O3	14.1005
Ba0.2Ca0.8Fe0.6Mn0.4O3	13.9157
Ba0.2Ca0.8Fe0.7Mn0.3O3	13.7426
Ba0.2Ca0.8Fe0.75Mn0.25O3	13.6653
Ba0.2Ca0.8Fe0.8Mn0.2O3	13.5964
Ba0.2Ca0.8Fe0.2Nb0.8O3	14.7266
Ba0.2Ca0.8Fe0.25Nb0.75O3	14.7931
Ba0.2Ca0.8Fe0.3Nb0.7O3	14.8474
Ba0.2Ca0.8Fe0.4Nb0.6O3	14.9028
Ba0.2Ca0.8Fe0.5Nb0.5O3	14.8685
Ba0.2Ca0.8Fe0.6Nb0.4O3	14.7426
Ba0.2Ca0.8Fe0.7Nb0.3O3	14.5495
Ba0.2Ca0.8Fe0.75Nb0.25O3	14.441
Ba0.2Ca0.8Fe0.8Nb0.2O3	14.3327
Ba0.2Ca0.8Fe0.2Ni0.8O3	15.3927
Ba0.2Ca0.8Fe0.25Ni0.75O3	15.3115
Ba0.2Ca0.8Fe0.3Ni0.7O3	15.2098
Ba0.2Ca0.8Fe0.4Ni0.6O3	14.9534
Ba0.2Ca0.8Fe0.5Ni0.5O3	14.646
Ba0.2Ca0.8Fe0.6Ni0.4O3	14.3177
Ba0.2Ca0.8Fe0.75Ni0.25O3	13.8573
Ba0.2Ca0.8Fe0.8Ni0.2O3	13.727
Ba0.2Ca0.8Fe0.2Sb0.8O3	14.166
Ba0.2Ca0.8Fe0.25Sb0.75O3	14.2129
Ba0.2Ca0.8Fe0.3Sb0.7O3	14.2732
Ba0.2Ca0.8Fe0.4Sb0.6O3	14.4325
Ba0.2Ca0.8Fe0.5Sb0.5O3	14.6205
Ba0.2Ca0.8Fe0.6Sb0.4O3	14.7855
Ba0.2Ca0.8Fe0.7Sb0.3O3	14.8701
Ba0.2Ca0.8Fe0.75Sb0.25O3	14.8715
Ba0.2Ca0.8Fe0.8Sb0.2O3	14.8458
Ba0.2Ca0.8Fe0.2Sn0.8O3	14.2098
Ba0.2Ca0.8Fe0.25Sn0.75O3	14.2674
Ba0.2Ca0.8Fe0.3Sn0.7O3	14.3377
Ba0.2Ca0.8Fe0.4Sn0.6O3	14.5066
Ba0.2Ca0.8Fe0.5Sn0.5O3	14.6778
Ba0.2Ca0.8Fe0.6Sn0.4O3	14.7905
Ba0.2Ca0.8Fe0.7Sn0.3O3	14.7936
Ba0.2Ca0.8Fe0.75Sn0.25O3	14.75
Ba0.2Ca0.8Fe0.8Sn0.2O3	14.6815
Ba0.2Ca0.8Fe0.7Ta0.3O3	14.1092
Ba0.2Ca0.8Fe0.75Ta0.25O3	14.1593
Ba0.2Ca0.8Fe0.8Ta0.2O3	14.2371
Ba0.2Ca0.8Fe0.2Ti0.8O3	14.7229
Ba0.2Ca0.8Fe0.25Ti0.75O3	14.6554
Ba0.2Ca0.8Fe0.3Ti0.7O3	14.5789
Ba0.2Ca0.8Fe0.4Ti0.6O3	14.404
Ba0.2Ca0.8Fe0.5Ti0.5O3	14.2122
Ba0.2Ca0.8Fe0.7Ti0.3O3	13.8421
Ba0.2Ca0.8Fe0.75Ti0.25O3	13.7638
Ba0.2Ca0.8Fe0.8Ti0.2O3	13.6943
Ba0.2Ca0.8Ga0.2Mg0.8O3	13.9324
Ba0.2Ca0.8Ga0.25Mg0.75O3	13.9065
Ba0.2Ca0.8Ga0.3Mg0.7O3	13.8801
Ba0.2Ca0.8Ga0.4Mg0.6O3	13.8272
Ba0.2Ca0.8Ga0.5Mg0.5O3	13.7781
Ba0.2Ca0.8Ga0.6Mg0.4O3	13.737
Ba0.2Ca0.8Ga0.7Mg0.3O3	13.7077
Ba0.2Ca0.8Ga0.75Mg0.25O3	13.6983
Ba0.2Ca0.8Ga0.8Mg0.2O3	13.6927
Ba0.2Ca0.8Ga0.4Mn0.6O3	13.9621
Ba0.2Ca0.8Ga0.5Mn0.5O3	13.9093
Ba0.2Ca0.8Ga0.6Mn0.4O3	13.8616
Ba0.2Ca0.8Ga0.7Mn0.3O3	13.8237
Ba0.2Ca0.8Ga0.75Mn0.25O3	13.8095
Ba0.2Ca0.8Ga0.8Mn0.2O3	13.799
Ba0.2Ca0.8Ga0.2Nb0.8O3	14.245
Ba0.2Ca0.8Ga0.25Nb0.75O3	14.2602
Ba0.2Ca0.8Ga0.3Nb0.7O3	14.2714
Ba0.2Ca0.8Ga0.4Nb0.6O3	14.2776
Ba0.2Ca0.8Ga0.5Nb0.5O3	14.2591
Ba0.2Ca0.8Ga0.6Nb0.4O3	14.2177
Ba0.2Ca0.8Ga0.7Nb0.3O3	14.1622
Ba0.2Ca0.8Ga0.75Nb0.25O3	14.1332
Ba0.2Ca0.8Ga0.8Nb0.2O3	14.1055
Ba0.2Ca0.8Ga0.2Ni0.8O3	14.3945
Ba0.2Ca0.8Ga0.25Ni0.75O3	14.3637
Ba0.2Ca0.8Ga0.3Ni0.7O3	14.327
Ba0.2Ca0.8Ga0.4Ni0.6O3	14.24
Ba0.2Ca0.8Ga0.5Ni0.5O3	14.1422
Ba0.2Ca0.8Ga0.7Ni0.3O3	13.9565
Ba0.2Ca0.8Ga0.75Ni0.25O3	13.9194
Ba0.2Ca0.8Ga0.8Ni0.2O3	13.8878
Ba0.2Ca0.8Ga0.25Sb0.75O3	14.1096
Ba0.2Ca0.8Ga0.3Sb0.7O3	14.1276
Ba0.2Ca0.8Ga0.4Sb0.6O3	14.1751
Ba0.2Ca0.8Ga0.5Sb0.5O3	14.2325
Ba0.2Ca0.8Ga0.6Sb0.4O3	14.2863
Ba0.2Ca0.8Ga0.7Sb0.3O3	14.3205
Ba0.2Ca0.8Ga0.75Sb0.25O3	14.3266
Ba0.2Ca0.8Ga0.8Sb0.2O3	14.3246
Ba0.2Ca0.8Ga0.2Sn0.8O3	14.1079
Ba0.2Ca0.8Ga0.25Sn0.75O3	14.1244
Ba0.2Ca0.8Ga0.3Sn0.7O3	14.1444
Ba0.2Ca0.8Ga0.4Sn0.6O3	14.1917
Ba0.2Ca0.8Ga0.5Sn0.5O3	14.2389
Ba0.2Ca0.8Ga0.6Sn0.4O3	14.2701
Ba0.2Ca0.8Ga0.7Sn0.3O3	14.2724
Ba0.2Ca0.8Ga0.75Sn0.25O3	14.2618
Ba0.2Ca0.8Ga0.8Sn0.2O3	14.2446
Ba0.2Ca0.8Ga0.8Ta0.2O3	14.1224
Ba0.2Ca0.8Ga0.2Ti0.8O3	14.1258
Ba0.2Ca0.8Ga0.5Ti0.5O3	13.9492
Ba0.2Ca0.8Ga0.6Ti0.4O3	13.8945
Ba0.2Ca0.8Ga0.7Ti0.3O3	13.8507
Ba0.2Ca0.8Ga0.75Ti0.25O3	13.8341
Ba0.2Ca0.8Ga0.8Ti0.2O3	13.8215
Ba0.2Ca0.8Mg0.2Mn0.8O3	13.8624
Ba0.2Ca0.8Mg0.25Mn0.75O3	13.8514
Ba0.2Ca0.8Mg0.3Mn0.7O3	13.8413
Ba0.2Ca0.8Mg0.4Mn0.6O3	13.8247
Ba0.2Ca0.8Mg0.5Mn0.5O3	13.8137
Ba0.2Ca0.8Mg0.6Mn0.4O3	13.8091
Ba0.2Ca0.8Mg0.7Mn0.3O3	13.8112
Ba0.2Ca0.8Mg0.75Mn0.25O3	13.8147
Ba0.2Ca0.8Mg0.8Mn0.2O3	13.8198
Ba0.2Ca0.8Mg0.5Nb0.5O3	13.9754
Ba0.2Ca0.8Mg0.6Nb0.4O3	13.9476
Ba0.2Ca0.8Mg0.7Nb0.3O3	13.9254
Ba0.2Ca0.8Mg0.75Nb0.25O3	13.918
Ba0.2Ca0.8Mg0.8Nb0.2O3	13.9135
Ba0.2Ca0.8Mg0.2Ni0.8O3	13.9611
Ba0.2Ca0.8Mg0.25Ni0.75O3	13.9471
Ba0.2Ca0.8Mg0.3Ni0.7O3	13.9331
Ba0.2Ca0.8Mg0.4Ni0.6O3	13.9063
Ba0.2Ca0.8Mg0.5Ni0.5O3	13.8831
Ba0.2Ca0.8Mg0.6Ni0.4O3	13.8653
Ba0.2Ca0.8Mg0.7Ni0.3O3	13.8545
Ba0.2Ca0.8Mg0.75Ni0.25O3	13.8521
Ba0.2Ca0.8Mg0.8Ni0.2O3	13.8516
Ba0.2Ca0.8Mg0.7Sb0.3O3	13.9941
Ba0.2Ca0.8Mg0.75Sb0.25O3	13.9824
Ba0.2Ca0.8Mg0.8Sb0.2O3	13.9732
Ba0.2Ca0.8Mg0.7Sn0.3O3	13.9718
Ba0.2Ca0.8Mg0.75Sn0.25O3	13.9579
Ba0.2Ca0.8Mg0.8Sn0.2O3	13.9469
Ba0.2Ca0.8Mg0.2Ti0.8O3	13.908
Ba0.2Ca0.8Mg0.25Ti0.75O3	13.898
Ba0.2Ca0.8Mg0.3Ti0.7O3	13.8886
Ba0.2Ca0.8Mg0.4Ti0.6O3	13.8725
Ba0.2Ca0.8Mg0.5Ti0.5O3	13.8608
Ba0.2Ca0.8Mg0.6Ti0.4O3	13.8543
Ba0.2Ca0.8Mg0.7Ti0.3O3	13.8534
Ba0.2Ca0.8Mg0.75Ti0.25O3	13.8551
Ba0.2Ca0.8Mg0.8Ti0.2O3	13.8581
Ba0.2Ca0.8Mn0.2Nb0.8O3	14.4196
Ba0.2Ca0.8Mn0.25Nb0.75O3	14.4359
Ba0.2Ca0.8Mn0.3Nb0.7O3	14.4397
Ba0.2Ca0.8Mn0.4Nb0.6O3	14.4017
Ba0.2Ca0.8Mn0.5Nb0.5O3	14.299
Ba0.2Ca0.8Mn0.6Nb0.4O3	14.1439
Ba0.2Ca0.8Mn0.7Nb0.3O3	13.967
Ba0.2Ca0.8Mn0.75Nb0.25O3	13.8827
Ba0.2Ca0.8Mn0.8Nb0.2O3	13.8076
Ba0.2Ca0.8Mn0.2Ni0.8O3	14.6021
Ba0.2Ca0.8Mn0.25Ni0.75O3	14.5086
Ba0.2Ca0.8Mn0.3Ni0.7O3	14.4028
Ba0.2Ca0.8Mn0.4Ni0.6O3	14.1632
Ba0.2Ca0.8Mn0.5Ni0.5O3	13.9046
Ba0.2Ca0.8Mn0.6Ni0.4O3	13.652
Ba0.2Ca0.8Mn0.7Ni0.3O3	13.4299
Ba0.2Ca0.8Mn0.75Ni0.25O3	13.337
Ba0.2Ca0.8Mn0.8Ni0.2O3	13.2588
Ba0.2Ca0.8Mn0.2Sb0.8O3	14.128
Ba0.2Ca0.8Mn0.25Sb0.75O3	14.1549
Ba0.2Ca0.8Mn0.3Sb0.7O3	14.1879
Ba0.2Ca0.8Mn0.4Sb0.6O3	14.2676
Ba0.2Ca0.8Mn0.5Sb0.5O3	14.3459
Ba0.2Ca0.8Mn0.6Sb0.4O3	14.3909
Ba0.2Ca0.8Mn0.7Sb0.3O3	14.3797
Ba0.2Ca0.8Mn0.75Sb0.25O3	14.3535
Ba0.2Ca0.8Mn0.8Sb0.2O3	14.3177
Ba0.2Ca0.8Mn0.2Sn0.8O3	14.1535
Ba0.2Ca0.8Mn0.25Sn0.75O3	14.1852
Ba0.2Ca0.8Mn0.3Sn0.7O3	14.2215
Ba0.2Ca0.8Mn0.4Sn0.6O3	14.2978
Ba0.2Ca0.8Mn0.5Sn0.5O3	14.3517
Ba0.2Ca0.8Mn0.6Sn0.4O3	14.3476
Ba0.2Ca0.8Mn0.7Sn0.3O3	14.2701
Ba0.2Ca0.8Mn0.75Sn0.25O3	14.2095
Ba0.2Ca0.8Mn0.8Sn0.2O3	14.142
Ba0.2Ca0.8Mn0.75Ta0.25O3	14.1068
Ba0.2Ca0.8Mn0.8Ta0.2O3	14.1414
Ba0.2Ca0.8Mn0.3Ti0.7O3	13.9228
Ba0.2Ca0.8Mn0.4Ti0.6O3	13.7606
Ba0.2Ca0.8Mn0.5Ti0.5O3	13.6015
Ba0.2Ca0.8Mn0.6Ti0.4O3	13.4588
Ba0.2Ca0.8Mn0.7Ti0.3O3	13.344
Ba0.2Ca0.8Mn0.75Ti0.25O3	13.2999
Ba0.2Ca0.8Mn0.8Ti0.2O3	13.2658
Ba0.2Ca0.8Ni0.2Sb0.8O3	14.1561
Ba0.2Ca0.8Ni0.25Sb0.75O3	14.2
Ba0.2Ca0.8Ni0.3Sb0.7O3	14.2578
Ba0.2Ca0.8Ni0.4Sb0.6O3	14.4185
Ba0.2Ca0.8Ni0.5Sb0.5O3	14.6286
Ba0.2Ca0.8Ni0.6Sb0.4O3	14.8505
Ba0.2Ca0.8Ni0.7Sb0.3O3	15.0269
Ba0.2Ca0.8Ni0.75Sb0.25O3	15.0806
Ba0.2Ca0.8Ni0.8Sb0.2O3	15.105
Ba0.2Ca0.8Ni0.2Sn0.8O3	14.1953
Ba0.2Ca0.8Ni0.25Sn0.75O3	14.2493
Ba0.2Ca0.8Ni0.3Sn0.7O3	14.3169
Ba0.2Ca0.8Ni0.4Sn0.6O3	14.4893
Ba0.2Ca0.8Ni0.5Sn0.5O3	14.6887
Ba0.2Ca0.8Ni0.6Sn0.4O3	14.8681
Ba0.2Ca0.8Ni0.7Sn0.3O3	14.9745
Ba0.2Ca0.8Ni0.75Sn0.25O3	14.989
Ba0.2Ca0.8Ni0.8Sn0.2O3	14.9762
Ba0.2Ca0.8Ni0.7Ta0.3O3	14.1104
Ba0.2Ca0.8Ni0.75Ta0.25O3	14.1667
Ba0.2Ca0.8Ni0.8Ta0.2O3	14.2589
Ba0.2Ca0.8Ni0.2Ti0.8O3	14.7921
Ba0.2Ca0.8Ni0.25Ti0.75O3	14.7583
Ba0.2Ca0.8Ni0.3Ti0.7O3	14.7172
Ba0.2Ca0.8Ni0.4Ti0.6O3	14.617
Ba0.2Ca0.8Ni0.5Ti0.5O3	14.5006
Ba0.2Ca0.8Ni0.6Ti0.4O3	14.3793
Ba0.2Ca0.8Ni0.7Ti0.3O3	14.264
Ba0.2Ca0.8Ni0.75Ti0.25O3	14.2116
Ba0.2Ca0.8Ni0.8Ti0.2O3	14.1641
Ba0.25Ca0.75Al0.2Co0.8O3	13.9857
Ba0.25Ca0.75Al0.25Co0.75O3	13.9608
Ba0.25Ca0.75Al0.3Co0.7O3	13.9353
Ba0.25Ca0.75Al0.4Co0.6O3	13.8839
Ba0.25Ca0.75Al0.5Co0.5O3	13.8357
Ba0.25Ca0.75Al0.6Co0.4O3	13.7946
Ba0.25Ca0.75Al0.7Co0.3O3	13.764
Ba0.25Ca0.75Al0.75Co0.25O3	13.7535
Ba0.25Ca0.75Al0.8Co0.2O3	13.7463
Ba0.25Ca0.75Al0.2Cr0.8O3	13.8614
Ba0.25Ca0.75Al0.25Cr0.75O3	13.8364
Ba0.25Ca0.75Al0.3Cr0.7O3	13.8118
Ba0.25Ca0.75Al0.4Cr0.6O3	13.7655
Ba0.25Ca0.75Al0.5Cr0.5O3	13.7261
Ba0.25Ca0.75Al0.6Cr0.4O3	13.6967
Ba0.25Ca0.75Al0.7Cr0.3O3	13.6796
Ba0.25Ca0.75Al0.75Cr0.25O3	13.676
Ba0.25Ca0.75Al0.8Cr0.2O3	13.6759
Ba0.25Ca0.75Al0.3Cu0.7O3	13.9992
Ba0.25Ca0.75Al0.4Cu0.6O3	13.9441
Ba0.25Ca0.75Al0.5Cu0.5O3	13.8862
Ba0.25Ca0.75Al0.6Cu0.4O3	13.8321
Ba0.25Ca0.75Al0.7Cu0.3O3	13.7882
Ba0.25Ca0.75Al0.75Cu0.25O3	13.7717
Ba0.25Ca0.75Al0.8Cu0.2O3	13.7596
Ba0.25Ca0.75Al0.2Fe0.8O3	13.8843
Ba0.25Ca0.75Al0.25Fe0.75O3	13.8605
Ba0.25Ca0.75Al0.3Fe0.7O3	13.8369
Ba0.25Ca0.75Al0.4Fe0.6O3	13.792
Ba0.25Ca0.75Al0.5Fe0.5O3	13.7529
Ba0.25Ca0.75Al0.6Fe0.4O3	13.7227
Ba0.25Ca0.75Al0.7Fe0.3O3	13.7036
Ba0.25Ca0.75Al0.75Fe0.25O3	13.6988
Ba0.25Ca0.75Al0.8Fe0.2O3	13.6971
Ba0.25Ca0.75Al0.2Ga0.8O3	13.9437
Ba0.25Ca0.75Al0.25Ga0.75O3	13.9241
Ba0.25Ca0.75Al0.3Ga0.7O3	13.9044
Ba0.25Ca0.75Al0.4Ga0.6O3	13.8657
Ba0.25Ca0.75Al0.5Ga0.5O3	13.8308
Ba0.25Ca0.75Al0.6Ga0.4O3	13.8031
Ba0.25Ca0.75Al0.7Ga0.3O3	13.7849
Ba0.25Ca0.75Al0.75Ga0.25O3	13.78
Ba0.25Ca0.75Al0.8Ga0.2O3	13.778
Ba0.25Ca0.75Al0.2Mg0.8O3	13.8313
Ba0.25Ca0.75Al0.25Mg0.75O3	13.817
Ba0.25Ca0.75Al0.3Mg0.7O3	13.8036
Ba0.25Ca0.75Al0.4Mg0.6O3	13.78
Ba0.25Ca0.75Al0.5Mg0.5O3	13.7619
Ba0.25Ca0.75Al0.6Mg0.4O3	13.7506
Ba0.25Ca0.75Al0.7Mg0.3O3	13.7468
Ba0.25Ca0.75Al0.75Mg0.25O3	13.7478
Ba0.25Ca0.75Al0.8Mg0.2O3	13.7508
Ba0.25Ca0.75Al0.2Mn0.8O3	13.7546
Ba0.25Ca0.75Al0.25Mn0.75O3	13.7338
Ba0.25Ca0.75Al0.3Mn0.7O3	13.7142
Ba0.25Ca0.75Al0.4Mn0.6O3	13.6801
Ba0.25Ca0.75Al0.5Mn0.5O3	13.6549
Ba0.25Ca0.75Al0.6Mn0.4O3	13.6404
Ba0.25Ca0.75Al0.7Mn0.3O3	13.6378
Ba0.25Ca0.75Al0.75Mn0.25O3	13.641
Ba0.25Ca0.75Al0.8Mn0.2O3	13.6472
Ba0.25Ca0.75Al0.5Nb0.5O3	13.9629
Ba0.25Ca0.75Al0.6Nb0.4O3	13.9121
Ba0.25Ca0.75Al0.7Nb0.3O3	13.8668
Ba0.25Ca0.75Al0.75Nb0.25O3	13.8494
Ba0.25Ca0.75Al0.8Nb0.2O3	13.8367
Ba0.25Ca0.75Al0.2Ni0.8O3	13.9658
Ba0.25Ca0.75Al0.25Ni0.75O3	13.9391
Ba0.25Ca0.75Al0.3Ni0.7O3	13.9116
Ba0.25Ca0.75Al0.4Ni0.6O3	13.8562
Ba0.25Ca0.75Al0.5Ni0.5O3	13.8043
Ba0.25Ca0.75Al0.6Ni0.4O3	13.7607
Ba0.25Ca0.75Al0.7Ni0.3O3	13.7292
Ba0.25Ca0.75Al0.75Ni0.25O3	13.7188
Ba0.25Ca0.75Al0.8Ni0.2O3	13.7124
Ba0.25Ca0.75Al0.7Sb0.3O3	13.9874
Ba0.25Ca0.75Al0.75Sb0.25O3	13.9676
Ba0.25Ca0.75Al0.8Sb0.2O3	13.9502
Ba0.25Ca0.75Al0.7Sn0.3O3	13.9491
Ba0.25Ca0.75Al0.75Sn0.25O3	13.9237
Ba0.25Ca0.75Al0.8Sn0.2O3	13.9019
Ba0.25Ca0.75Al0.2Ti0.8O3	13.8421
Ba0.25Ca0.75Al0.25Ti0.75O3	13.8227
Ba0.25Ca0.75Al0.3Ti0.7O3	13.8041
Ba0.25Ca0.75Al0.4Ti0.6O3	13.7704
Ba0.25Ca0.75Al0.5Ti0.5O3	13.7433
Ba0.25Ca0.75Al0.6Ti0.4O3	13.7249
Ba0.25Ca0.75Al0.7Ti0.3O3	13.7166
Ba0.25Ca0.75Al0.75Ti0.25O3	13.7164
Ba0.25Ca0.75Al0.8Ti0.2O3	13.7187
Ba0.25Ca0.75Co0.2Cr0.8O3	14.862
Ba0.25Ca0.75Co0.25Cr0.75O3	14.7975
Ba0.25Ca0.75Co0.3Cr0.7O3	14.7229
Ba0.25Ca0.75Co0.4Cr0.6O3	14.55
Ba0.25Ca0.75Co0.5Cr0.5O3	14.3593
Ba0.25Ca0.75Co0.6Cr0.4O3	14.1692
Ba0.25Ca0.75Co0.7Cr0.3O3	13.9976
Ba0.25Ca0.75Co0.75Cr0.25O3	13.9235
Ba0.25Ca0.75Co0.8Cr0.2O3	13.8592
Ba0.25Ca0.75Co0.2Cu0.8O3	15.3696
Ba0.25Ca0.75Co0.25Cu0.75O3	15.365
Ba0.25Ca0.75Co0.3Cu0.7O3	15.3388
Ba0.25Ca0.75Co0.4Cu0.6O3	15.2223
Ba0.25Ca0.75Co0.5Cu0.5O3	15.0318
Ba0.25Ca0.75Co0.6Cu0.4O3	14.7924
Ba0.25Ca0.75Co0.7Cu0.3O3	14.5369
Ba0.25Ca0.75Co0.75Cu0.25O3	14.414
Ba0.25Ca0.75Co0.8Cu0.2O3	14.2992
Ba0.25Ca0.75Co0.2Fe0.8O3	15.257
Ba0.25Ca0.75Co0.25Fe0.75O3	15.2149
Ba0.25Ca0.75Co0.3Fe0.7O3	15.1594
Ba0.25Ca0.75Co0.4Fe0.6O3	15.0123
Ba0.25Ca0.75Co0.5Fe0.5O3	14.828
Ba0.25Ca0.75Co0.6Fe0.4O3	14.6236
Ba0.25Ca0.75Co0.7Fe0.3O3	14.4184
Ba0.25Ca0.75Co0.75Fe0.25O3	14.3213
Ba0.25Ca0.75Co0.8Fe0.2O3	14.2305
Ba0.25Ca0.75Co0.2Ga0.8O3	14.9507
Ba0.25Ca0.75Co0.25Ga0.75O3	14.9297
Ba0.25Ca0.75Co0.3Ga0.7O3	14.8972
Ba0.25Ca0.75Co0.4Ga0.6O3	14.8006
Ba0.25Ca0.75Co0.5Ga0.5O3	14.6699
Ba0.25Ca0.75Co0.6Ga0.4O3	14.5194
Ba0.25Ca0.75Co0.7Ga0.3O3	14.3652
Ba0.25Ca0.75Co0.75Ga0.25O3	14.2919
Ba0.25Ca0.75Co0.8Ga0.2O3	14.2235
Ba0.25Ca0.75Co0.2Mg0.8O3	14.2613
Ba0.25Ca0.75Co0.25Mg0.75O3	14.2322
Ba0.25Ca0.75Co0.3Mg0.7O3	14.1996
Ba0.25Ca0.75Co0.4Mg0.6O3	14.1262
Ba0.25Ca0.75Co0.6Mg0.4O3	13.9686
Ba0.25Ca0.75Co0.7Mg0.3O3	13.8982
Ba0.25Ca0.75Co0.75Mg0.25O3	13.8678
Ba0.25Ca0.75Co0.8Mg0.2O3	13.8415
Ba0.25Ca0.75Co0.2Mn0.8O3	14.5577
Ba0.25Ca0.75Co0.25Mn0.75O3	14.5307
Ba0.25Ca0.75Co0.3Mn0.7O3	14.4971
Ba0.25Ca0.75Co0.4Mn0.6O3	14.4125
Ba0.25Ca0.75Co0.5Mn0.5O3	14.3109
Ba0.25Ca0.75Co0.6Mn0.4O3	14.2016
Ba0.25Ca0.75Co0.2Nb0.8O3	14.7049
Ba0.25Ca0.75Co0.25Nb0.75O3	14.7806
Ba0.25Ca0.75Co0.3Nb0.7O3	14.849
Ba0.25Ca0.75Co0.4Nb0.6O3	14.9495
Ba0.25Ca0.75Co0.5Nb0.5O3	14.9832
Ba0.25Ca0.75Co0.6Nb0.4O3	14.9423
Ba0.25Ca0.75Co0.7Nb0.3O3	14.8379
Ba0.25Ca0.75Co0.75Nb0.25O3	14.7698
Ba0.25Ca0.75Co0.8Nb0.2O3	14.6965
Ba0.25Ca0.75Co0.2Ni0.8O3	15.4552
Ba0.25Ca0.75Co0.25Ni0.75O3	15.4033
Ba0.25Ca0.75Co0.3Ni0.7O3	15.3331
Ba0.25Ca0.75Co0.4Ni0.6O3	15.1441
Ba0.25Ca0.75Co0.5Ni0.5O3	14.9064
Ba0.25Ca0.75Co0.6Ni0.4O3	14.645
Ba0.25Ca0.75Co0.7Ni0.3O3	14.3875
Ba0.25Ca0.75Co0.75Ni0.25O3	14.2682
Ba0.25Ca0.75Co0.8Ni0.2O3	14.159
Ba0.25Ca0.75Co0.2Sb0.8O3	14.1631
Ba0.25Ca0.75Co0.25Sb0.75O3	14.21
Ba0.25Ca0.75Co0.3Sb0.7O3	14.2718
Ba0.25Ca0.75Co0.4Sb0.6O3	14.4425
Ba0.25Ca0.75Co0.5Sb0.5O3	14.6644
Ba0.25Ca0.75Co0.6Sb0.4O3	14.8968
Ba0.25Ca0.75Co0.7Sb0.3O3	15.0801
Ba0.25Ca0.75Co0.75Sb0.25O3	15.136
Ba0.25Ca0.75Co0.8Sb0.2O3	15.162
Ba0.25Ca0.75Co0.2Sn0.8O3	14.205
Ba0.25Ca0.75Co0.25Sn0.75O3	14.2628
Ba0.25Ca0.75Co0.3Sn0.7O3	14.3348
Ba0.25Ca0.75Co0.4Sn0.6O3	14.5175
Ba0.25Ca0.75Co0.5Sn0.5O3	14.7268
Ba0.25Ca0.75Co0.6Sn0.4O3	14.9116
Ba0.25Ca0.75Co0.7Sn0.3O3	15.0168
Ba0.25Ca0.75Co0.75Sn0.25O3	15.0285
Ba0.25Ca0.75Co0.8Sn0.2O3	15.0121
Ba0.25Ca0.75Co0.7Ta0.3O3	14.1114
Ba0.25Ca0.75Co0.75Ta0.25O3	14.1701
Ba0.25Ca0.75Co0.8Ta0.2O3	14.2682
Ba0.25Ca0.75Co0.2Ti0.8O3	14.7624
Ba0.25Ca0.75Co0.25Ti0.75O3	14.725
Ba0.25Ca0.75Co0.3Ti0.7O3	14.68
Ba0.25Ca0.75Co0.4Ti0.6O3	14.5714
Ba0.25Ca0.75Co0.5Ti0.5O3	14.4463
Ba0.25Ca0.75Co0.6Ti0.4O3	14.3162
Ba0.25Ca0.75Co0.7Ti0.3O3	14.1931
Ba0.25Ca0.75Co0.75Ti0.25O3	14.1375
Ba0.25Ca0.75Cr0.2Cu0.8O3	15.0888
Ba0.25Ca0.75Cr0.25Cu0.75O3	15.0593
Ba0.25Ca0.75Cr0.3Cu0.7O3	15.0084
Ba0.25Ca0.75Cr0.4Cu0.6O3	14.8445
Ba0.25Ca0.75Cr0.5Cu0.5O3	14.6105
Ba0.25Ca0.75Cr0.6Cu0.4O3	14.3327
Ba0.25Ca0.75Cr0.75Cu0.25O3	13.9109
Ba0.25Ca0.75Cr0.8Cu0.2O3	13.7869
Ba0.25Ca0.75Cr0.2Fe0.8O3	14.8689
Ba0.25Ca0.75Cr0.25Fe0.75O3	14.8004
Ba0.25Ca0.75Cr0.3Fe0.7O3	14.7195
Ba0.25Ca0.75Cr0.4Fe0.6O3	14.5266
Ba0.25Ca0.75Cr0.5Fe0.5O3	14.3044
Ba0.25Ca0.75Cr0.7Fe0.3O3	13.8487
Ba0.25Ca0.75Cr0.75Fe0.25O3	13.7468
Ba0.25Ca0.75Cr0.8Fe0.2O3	13.6543
Ba0.25Ca0.75Cr0.2Ga0.8O3	14.6851
Ba0.25Ca0.75Cr0.25Ga0.75O3	14.6436
Ba0.25Ca0.75Cr0.3Ga0.7O3	14.5912
Ba0.25Ca0.75Cr0.4Ga0.6O3	14.4572
Ba0.25Ca0.75Cr0.5Ga0.5O3	14.2938
Ba0.25Ca0.75Cr0.6Ga0.4O3	14.1166
Ba0.25Ca0.75Cr0.7Ga0.3O3	13.9436
Ba0.25Ca0.75Cr0.75Ga0.25O3	13.864
Ba0.25Ca0.75Cr0.8Ga0.2O3	13.7917
Ba0.25Ca0.75Cr0.3Mg0.7O3	13.9634
Ba0.25Ca0.75Cr0.4Mg0.6O3	13.8625
Ba0.25Ca0.75Cr0.5Mg0.5O3	13.7581
Ba0.25Ca0.75Cr0.6Mg0.4O3	13.6581
Ba0.25Ca0.75Cr0.7Mg0.3O3	13.5702
Ba0.25Ca0.75Cr0.75Mg0.25O3	13.533
Ba0.25Ca0.75Cr0.8Mg0.2O3	13.5012
Ba0.25Ca0.75Cr0.2Mn0.8O3	14.2493
Ba0.25Ca0.75Cr0.25Mn0.75O3	14.1975
Ba0.25Ca0.75Cr0.3Mn0.7O3	14.1395
Ba0.25Ca0.75Cr0.5Mn0.5O3	13.8645
Ba0.25Ca0.75Cr0.6Mn0.4O3	13.7204
Ba0.25Ca0.75Cr0.7Mn0.3O3	13.5885
Ba0.25Ca0.75Cr0.75Mn0.25O3	13.5309
Ba0.25Ca0.75Cr0.8Mn0.2O3	13.4804
Ba0.25Ca0.75Cr0.2Nb0.8O3	14.5843
Ba0.25Ca0.75Cr0.25Nb0.75O3	14.6342
Ba0.25Ca0.75Cr0.3Nb0.7O3	14.6738
Ba0.25Ca0.75Cr0.4Nb0.6O3	14.7081
Ba0.25Ca0.75Cr0.5Nb0.5O3	14.6675
Ba0.25Ca0.75Cr0.6Nb0.4O3	14.5509
Ba0.25Ca0.75Cr0.7Nb0.3O3	14.3791
Ba0.25Ca0.75Cr0.75Nb0.25O3	14.284
Ba0.25Ca0.75Cr0.8Nb0.2O3	14.1898
Ba0.25Ca0.75Cr0.2Ni0.8O3	15.0794
Ba0.25Ca0.75Cr0.25Ni0.75O3	15.0046
Ba0.25Ca0.75Cr0.3Ni0.7O3	14.9128
Ba0.25Ca0.75Cr0.4Ni0.6O3	14.685
Ba0.25Ca0.75Cr0.5Ni0.5O3	14.415
Ba0.25Ca0.75Cr0.6Ni0.4O3	14.1284
Ba0.25Ca0.75Cr0.7Ni0.3O3	13.8534
Ba0.25Ca0.75Cr0.75Ni0.25O3	13.7286
Ba0.25Ca0.75Cr0.8Ni0.2O3	13.6162
Ba0.25Ca0.75Cr0.2Sb0.8O3	14.1463
Ba0.25Ca0.75Cr0.25Sb0.75O3	14.1838
Ba0.25Ca0.75Cr0.3Sb0.7O3	14.2318
Ba0.25Ca0.75Cr0.4Sb0.6O3	14.3576
Ba0.25Ca0.75Cr0.5Sb0.5O3	14.5036
Ba0.25Ca0.75Cr0.6Sb0.4O3	14.6266
Ba0.25Ca0.75Cr0.7Sb0.3O3	14.6799
Ba0.25Ca0.75Cr0.75Sb0.25O3	14.6724
Ba0.25Ca0.75Cr0.8Sb0.2O3	14.643
Ba0.25Ca0.75Cr0.2Sn0.8O3	14.181
Ba0.25Ca0.75Cr0.25Sn0.75O3	14.2268
Ba0.25Ca0.75Cr0.3Sn0.7O3	14.2822
Ba0.25Ca0.75Cr0.4Sn0.6O3	14.414
Ba0.25Ca0.75Cr0.5Sn0.5O3	14.5433
Ba0.25Ca0.75Cr0.6Sn0.4O3	14.6197
Ba0.25Ca0.75Cr0.7Sn0.3O3	14.6022
Ba0.25Ca0.75Cr0.75Sn0.25O3	14.5559
Ba0.25Ca0.75Cr0.8Sn0.2O3	14.4896
Ba0.25Ca0.75Cr0.75Ta0.25O3	14.1364
Ba0.25Ca0.75Cr0.8Ta0.2O3	14.1963
Ba0.25Ca0.75Cr0.2Ti0.8O3	14.4717
Ba0.25Ca0.75Cr0.25Ti0.75O3	14.4141
Ba0.25Ca0.75Cr0.3Ti0.7O3	14.3494
Ba0.25Ca0.75Cr0.4Ti0.6O3	14.2039
Ba0.25Ca0.75Cr0.6Ti0.4O3	13.8886
Ba0.25Ca0.75Cr0.7Ti0.3O3	13.7449
Ba0.25Ca0.75Cr0.75Ti0.25O3	13.682
Ba0.25Ca0.75Cr0.8Ti0.2O3	13.6266
Ba0.25Ca0.75Cu0.2Fe0.8O3	14.8311
Ba0.25Ca0.75Cu0.25Fe0.75O3	14.8187
Ba0.25Ca0.75Cu0.3Fe0.7O3	14.7984
Ba0.25Ca0.75Cu0.4Fe0.6O3	14.7367
Ba0.25Ca0.75Cu0.5Fe0.5O3	14.6532
Ba0.25Ca0.75Cu0.6Fe0.4O3	14.5578
Ba0.25Ca0.75Cu0.7Fe0.3O3	14.4607
Ba0.25Ca0.75Cu0.75Fe0.25O3	14.4145
Ba0.25Ca0.75Cu0.8Fe0.2O3	14.371
Ba0.25Ca0.75Cu0.2Ga0.8O3	14.6323
Ba0.25Ca0.75Cu0.25Ga0.75O3	14.6274
Ba0.25Ca0.75Cu0.3Ga0.7O3	14.6162
Ba0.25Ca0.75Cu0.4Ga0.6O3	14.5762
Ba0.25Ca0.75Cu0.5Ga0.5O3	14.5182
Ba0.25Ca0.75Cu0.6Ga0.4O3	14.45
Ba0.25Ca0.75Cu0.7Ga0.3O3	14.3799
Ba0.25Ca0.75Cu0.75Ga0.25O3	14.3464
Ba0.25Ca0.75Cu0.8Ga0.2O3	14.315
Ba0.25Ca0.75Cu0.2Mg0.8O3	14.1573
Ba0.25Ca0.75Cu0.25Mg0.75O3	14.1482
Ba0.25Ca0.75Cu0.3Mg0.7O3	14.1383
Ba0.25Ca0.75Cu0.4Mg0.6O3	14.117
Ba0.25Ca0.75Cu0.2Mn0.8O3	14.3266
Ba0.25Ca0.75Cu0.25Mn0.75O3	14.3248
Ba0.25Ca0.75Cu0.3Mn0.7O3	14.321
Ba0.25Ca0.75Cu0.4Mn0.6O3	14.3075
Ba0.25Ca0.75Cu0.5Mn0.5O3	14.2881
Ba0.25Ca0.75Cu0.6Mn0.4O3	14.265
Ba0.25Ca0.75Cu0.7Mn0.3O3	14.2408
Ba0.25Ca0.75Cu0.75Mn0.25O3	14.229
Ba0.25Ca0.75Cu0.8Mn0.2O3	14.2177
Ba0.25Ca0.75Cu0.2Nb0.8O3	14.4679
Ba0.25Ca0.75Cu0.25Nb0.75O3	14.5182
Ba0.25Ca0.75Cu0.3Nb0.7O3	14.5653
Ba0.25Ca0.75Cu0.4Nb0.6O3	14.6424
Ba0.25Ca0.75Cu0.5Nb0.5O3	14.6866
Ba0.25Ca0.75Cu0.6Nb0.4O3	14.6924
Ba0.25Ca0.75Cu0.7Nb0.3O3	14.6618
Ba0.25Ca0.75Cu0.75Nb0.25O3	14.6353
Ba0.25Ca0.75Cu0.8Nb0.2O3	14.603
Ba0.25Ca0.75Cu0.2Ni0.8O3	14.9755
Ba0.25Ca0.75Cu0.25Ni0.75O3	14.9503
Ba0.25Ca0.75Cu0.3Ni0.7O3	14.9141
Ba0.25Ca0.75Cu0.4Ni0.6O3	14.8138
Ba0.25Ca0.75Cu0.5Ni0.5O3	14.6882
Ba0.25Ca0.75Cu0.6Ni0.4O3	14.5537
Ba0.25Ca0.75Cu0.7Ni0.3O3	14.4262
Ba0.25Ca0.75Cu0.75Ni0.25O3	14.3689
Ba0.25Ca0.75Cu0.8Ni0.2O3	14.3175
Ba0.25Ca0.75Cu0.2Sb0.8O3	14.1286
Ba0.25Ca0.75Cu0.25Sb0.75O3	14.1592
Ba0.25Ca0.75Cu0.3Sb0.7O3	14.1999
Ba0.25Ca0.75Cu0.4Sb0.6O3	14.3145
Ba0.25Ca0.75Cu0.5Sb0.5O3	14.4699
Ba0.25Ca0.75Cu0.6Sb0.4O3	14.6437
Ba0.25Ca0.75Cu0.7Sb0.3O3	14.7949
Ba0.25Ca0.75Cu0.75Sb0.25O3	14.8471
Ba0.25Ca0.75Cu0.8Sb0.2O3	14.8768
Ba0.25Ca0.75Cu0.2Sn0.8O3	14.1549
Ba0.25Ca0.75Cu0.25Sn0.75O3	14.1922
Ba0.25Ca0.75Cu0.3Sn0.7O3	14.239
Ba0.25Ca0.75Cu0.4Sn0.6O3	14.3604
Ba0.25Ca0.75Cu0.5Sn0.5O3	14.5067
Ba0.25Ca0.75Cu0.6Sn0.4O3	14.6499
Ba0.25Ca0.75Cu0.7Sn0.3O3	14.7533
Ba0.25Ca0.75Cu0.75Sn0.25O3	14.78
Ba0.25Ca0.75Cu0.8Sn0.2O3	14.7866
Ba0.25Ca0.75Cu0.75Ta0.25O3	14.1337
Ba0.25Ca0.75Cu0.8Ta0.2O3	14.2014
Ba0.25Ca0.75Cu0.2Ti0.8O3	14.4876
Ba0.25Ca0.75Cu0.25Ti0.75O3	14.4765
Ba0.25Ca0.75Cu0.3Ti0.7O3	14.4618
Ba0.25Ca0.75Cu0.4Ti0.6O3	14.4241
Ba0.25Ca0.75Cu0.5Ti0.5O3	14.3793
Ba0.25Ca0.75Cu0.6Ti0.4O3	14.3328
Ba0.25Ca0.75Cu0.7Ti0.3O3	14.2889
Ba0.25Ca0.75Cu0.75Ti0.25O3	14.2691
Ba0.25Ca0.75Cu0.8Ti0.2O3	14.251
Ba0.25Ca0.75Fe0.2Ga0.8O3	14.8711
Ba0.25Ca0.75Fe0.25Ga0.75O3	14.8198
Ba0.25Ca0.75Fe0.3Ga0.7O3	14.7546
Ba0.25Ca0.75Fe0.4Ga0.6O3	14.5875
Ba0.25Ca0.75Fe0.5Ga0.5O3	14.3841
Ba0.25Ca0.75Fe0.6Ga0.4O3	14.1647
Ba0.25Ca0.75Fe0.7Ga0.3O3	13.952
Ba0.25Ca0.75Fe0.75Ga0.25O3	13.8551
Ba0.25Ca0.75Fe0.8Ga0.2O3	13.7677
Ba0.25Ca0.75Fe0.2Mg0.8O3	14.1181
Ba0.25Ca0.75Fe0.4Mg0.6O3	13.8784
Ba0.25Ca0.75Fe0.5Mg0.5O3	13.7465
Ba0.25Ca0.75Fe0.6Mg0.4O3	13.6197
Ba0.25Ca0.75Fe0.7Mg0.3O3	13.5083
Ba0.25Ca0.75Fe0.75Mg0.25O3	13.4613
Ba0.25Ca0.75Fe0.8Mg0.2O3	13.4212
Ba0.25Ca0.75Fe0.2Mn0.8O3	14.4131
Ba0.25Ca0.75Fe0.25Mn0.75O3	14.3492
Ba0.25Ca0.75Fe0.3Mn0.7O3	14.2767
Ba0.25Ca0.75Fe0.4Mn0.6O3	14.1108
Ba0.25Ca0.75Fe0.5Mn0.5O3	13.9279
Ba0.25Ca0.75Fe0.6Mn0.4O3	13.7437
Ba0.25Ca0.75Fe0.7Mn0.3O3	13.575
Ba0.25Ca0.75Fe0.75Mn0.25O3	13.5014
Ba0.25Ca0.75Fe0.8Mn0.2O3	13.4372
Ba0.25Ca0.75Fe0.2Nb0.8O3	14.7205
Ba0.25Ca0.75Fe0.25Nb0.75O3	14.784
Ba0.25Ca0.75Fe0.3Nb0.7O3	14.8344
Ba0.25Ca0.75Fe0.4Nb0.6O3	14.8795
Ba0.25Ca0.75Fe0.5Nb0.5O3	14.8325
Ba0.25Ca0.75Fe0.6Nb0.4O3	14.6933
Ba0.25Ca0.75Fe0.7Nb0.3O3	14.4894
Ba0.25Ca0.75Fe0.75Nb0.25O3	14.3774
Ba0.25Ca0.75Fe0.8Nb0.2O3	14.2675
Ba0.25Ca0.75Fe0.2Ni0.8O3	15.3597
Ba0.25Ca0.75Fe0.25Ni0.75O3	15.2676
Ba0.25Ca0.75Fe0.3Ni0.7O3	15.1541
Ba0.25Ca0.75Fe0.4Ni0.6O3	14.8722
Ba0.25Ca0.75Fe0.5Ni0.5O3	14.539
Ba0.25Ca0.75Fe0.6Ni0.4O3	14.1871
Ba0.25Ca0.75Fe0.7Ni0.3O3	13.8522
Ba0.25Ca0.75Fe0.75Ni0.25O3	13.7016
Ba0.25Ca0.75Fe0.8Ni0.2O3	13.5669
Ba0.25Ca0.75Fe0.2Sb0.8O3	14.1675
Ba0.25Ca0.75Fe0.25Sb0.75O3	14.2146
Ba0.25Ca0.75Fe0.3Sb0.7O3	14.2749
Ba0.25Ca0.75Fe0.4Sb0.6O3	14.4326
Ba0.25Ca0.75Fe0.5Sb0.5O3	14.6152
Ba0.25Ca0.75Fe0.6Sb0.4O3	14.7703
Ba0.25Ca0.75Fe0.7Sb0.3O3	14.8428
Ba0.25Ca0.75Fe0.75Sb0.25O3	14.839
Ba0.25Ca0.75Fe0.8Sb0.2O3	14.8098
Ba0.25Ca0.75Fe0.2Sn0.8O3	14.2115
Ba0.25Ca0.75Fe0.25Sn0.75O3	14.2692
Ba0.25Ca0.75Fe0.3Sn0.7O3	14.339
Ba0.25Ca0.75Fe0.4Sn0.6O3	14.5048
Ba0.25Ca0.75Fe0.5Sn0.5O3	14.6677
Ba0.25Ca0.75Fe0.6Sn0.4O3	14.7663
Ba0.25Ca0.75Fe0.7Sn0.3O3	14.7523
Ba0.25Ca0.75Fe0.75Sn0.25O3	14.7011
Ba0.25Ca0.75Fe0.8Sn0.2O3	14.6268
Ba0.25Ca0.75Fe0.7Ta0.3O3	14.1065
Ba0.25Ca0.75Fe0.75Ta0.25O3	14.1542
Ba0.25Ca0.75Fe0.8Ta0.2O3	14.2298
Ba0.25Ca0.75Fe0.2Ti0.8O3	14.625
Ba0.25Ca0.75Fe0.25Ti0.75O3	14.553
Ba0.25Ca0.75Fe0.3Ti0.7O3	14.4721
Ba0.25Ca0.75Fe0.4Ti0.6O3	14.2894
Ba0.25Ca0.75Fe0.6Ti0.4O3	13.8949
Ba0.25Ca0.75Fe0.7Ti0.3O3	13.717
Ba0.25Ca0.75Fe0.75Ti0.25O3	13.6398
Ba0.25Ca0.75Fe0.8Ti0.2O3	13.5724
Ba0.25Ca0.75Ga0.2Mg0.8O3	13.834
Ba0.25Ca0.75Ga0.25Mg0.75O3	13.8047
Ba0.25Ca0.75Ga0.3Mg0.7O3	13.7754
Ba0.25Ca0.75Ga0.4Mg0.6O3	13.7185
Ba0.25Ca0.75Ga0.5Mg0.5O3	13.6679
Ba0.25Ca0.75Ga0.6Mg0.4O3	13.6281
Ba0.25Ca0.75Ga0.7Mg0.3O3	13.6028
Ba0.25Ca0.75Ga0.75Mg0.25O3	13.5964
Ba0.25Ca0.75Ga0.8Mg0.2O3	13.5943
Ba0.25Ca0.75Ga0.2Mn0.8O3	13.939
Ba0.25Ca0.75Ga0.25Mn0.75O3	13.9135
Ba0.25Ca0.75Ga0.3Mn0.7O3	13.8872
Ba0.25Ca0.75Ga0.4Mn0.6O3	13.8345
Ba0.25Ca0.75Ga0.5Mn0.5O3	13.7856
Ba0.25Ca0.75Ga0.6Mn0.4O3	13.7452
Ba0.25Ca0.75Ga0.7Mn0.3O3	13.7172
Ba0.25Ca0.75Ga0.75Mn0.25O3	13.7089
Ba0.25Ca0.75Ga0.8Mn0.2O3	13.7047
Ba0.25Ca0.75Ga0.2Nb0.8O3	14.2199
Ba0.25Ca0.75Ga0.25Nb0.75O3	14.2306
Ba0.25Ca0.75Ga0.3Nb0.7O3	14.2372
Ba0.25Ca0.75Ga0.4Nb0.6O3	14.2347
Ba0.25Ca0.75Ga0.5Nb0.5O3	14.2091
Ba0.25Ca0.75Ga0.6Nb0.4O3	14.164
Ba0.25Ca0.75Ga0.7Nb0.3O3	14.1091
Ba0.25Ca0.75Ga0.2Ni0.8O3	14.324
Ba0.25Ca0.75Ga0.25Ni0.75O3	14.2887
Ba0.25Ca0.75Ga0.3Ni0.7O3	14.2479
Ba0.25Ca0.75Ga0.4Ni0.6O3	14.1541
Ba0.25Ca0.75Ga0.6Ni0.4O3	13.9526
Ba0.25Ca0.75Ga0.7Ni0.3O3	13.8671
Ba0.25Ca0.75Ga0.75Ni0.25O3	13.8322
Ba0.25Ca0.75Ga0.8Ni0.2O3	13.8038
Ba0.25Ca0.75Ga0.25Sb0.75O3	14.1064
Ba0.25Ca0.75Ga0.3Sb0.7O3	14.1226
Ba0.25Ca0.75Ga0.4Sb0.6O3	14.165
Ba0.25Ca0.75Ga0.5Sb0.5O3	14.2149
Ba0.25Ca0.75Ga0.6Sb0.4O3	14.2606
Ba0.25Ca0.75Ga0.7Sb0.3O3	14.289
Ba0.25Ca0.75Ga0.75Sb0.25O3	14.2941
Ba0.25Ca0.75Ga0.8Sb0.2O3	14.2926
Ba0.25Ca0.75Ga0.2Sn0.8O3	14.1046
Ba0.25Ca0.75Ga0.25Sn0.75O3	14.1194
Ba0.25Ca0.75Ga0.3Sn0.7O3	14.137
Ba0.25Ca0.75Ga0.4Sn0.6O3	14.1774
Ba0.25Ca0.75Ga0.5Sn0.5O3	14.2152
Ba0.25Ca0.75Ga0.6Sn0.4O3	14.2362
Ba0.25Ca0.75Ga0.7Sn0.3O3	14.2309
Ba0.25Ca0.75Ga0.75Sn0.25O3	14.2185
Ba0.25Ca0.75Ga0.8Sn0.2O3	14.2013
Ba0.25Ca0.75Ga0.8Ta0.2O3	14.1168
Ba0.25Ca0.75Ga0.25Ti0.75O3	13.9977
Ba0.25Ca0.75Ga0.3Ti0.7O3	13.9676
Ba0.25Ca0.75Ga0.4Ti0.6O3	13.906
Ba0.25Ca0.75Ga0.5Ti0.5O3	13.8473
Ba0.25Ca0.75Ga0.6Ti0.4O3	13.797
Ba0.25Ca0.75Ga0.7Ti0.3O3	13.7601
Ba0.25Ca0.75Ga0.75Ti0.25O3	13.7477
Ba0.25Ca0.75Ga0.8Ti0.2O3	13.7397
Ba0.25Ca0.75Mg0.2Mn0.8O3	13.8294
Ba0.25Ca0.75Mg0.25Mn0.75O3	13.817
Ba0.25Ca0.75Mg0.3Mn0.7O3	13.8056
Ba0.25Ca0.75Mg0.4Mn0.6O3	13.7868
Ba0.25Ca0.75Mg0.5Mn0.5O3	13.7744
Ba0.25Ca0.75Mg0.6Mn0.4O3	13.7694
Ba0.25Ca0.75Mg0.7Mn0.3O3	13.7721
Ba0.25Ca0.75Mg0.75Mn0.25O3	13.7762
Ba0.25Ca0.75Mg0.8Mn0.2O3	13.7822
Ba0.25Ca0.75Mg0.4Nb0.6O3	13.992
Ba0.25Ca0.75Mg0.5Nb0.5O3	13.9595
Ba0.25Ca0.75Mg0.6Nb0.4O3	13.9276
Ba0.25Ca0.75Mg0.7Nb0.3O3	13.9023
Ba0.25Ca0.75Mg0.75Nb0.25O3	13.8938
Ba0.25Ca0.75Mg0.8Nb0.2O3	13.8888
Ba0.25Ca0.75Mg0.2Ni0.8O3	13.9424
Ba0.25Ca0.75Mg0.25Ni0.75O3	13.9263
Ba0.25Ca0.75Mg0.3Ni0.7O3	13.9103
Ba0.25Ca0.75Mg0.4Ni0.6O3	13.8797
Ba0.25Ca0.75Mg0.5Ni0.5O3	13.8531
Ba0.25Ca0.75Mg0.6Ni0.4O3	13.8328
Ba0.25Ca0.75Mg0.7Ni0.3O3	13.8205
Ba0.25Ca0.75Mg0.75Ni0.25O3	13.8178
Ba0.25Ca0.75Mg0.8Ni0.2O3	13.8174
Ba0.25Ca0.75Mg0.7Sb0.3O3	13.9802
Ba0.25Ca0.75Mg0.75Sb0.25O3	13.9665
Ba0.25Ca0.75Mg0.8Sb0.2O3	13.9557
Ba0.25Ca0.75Mg0.6Sn0.4O3	13.9912
Ba0.25Ca0.75Mg0.7Sn0.3O3	13.9547
Ba0.25Ca0.75Mg0.75Sn0.25O3	13.9386
Ba0.25Ca0.75Mg0.8Sn0.2O3	13.9259
Ba0.25Ca0.75Mg0.2Ti0.8O3	13.8829
Ba0.25Ca0.75Mg0.25Ti0.75O3	13.8716
Ba0.25Ca0.75Mg0.3Ti0.7O3	13.861
Ba0.25Ca0.75Mg0.4Ti0.6O3	13.8429
Ba0.25Ca0.75Mg0.5Ti0.5O3	13.8297
Ba0.25Ca0.75Mg0.6Ti0.4O3	13.8224
Ba0.25Ca0.75Mg0.7Ti0.3O3	13.8215
Ba0.25Ca0.75Mg0.75Ti0.25O3	13.8235
Ba0.25Ca0.75Mg0.8Ti0.2O3	13.8271
Ba0.25Ca0.75Mn0.2Nb0.8O3	14.4013
Ba0.25Ca0.75Mn0.25Nb0.75O3	14.4115
Ba0.25Ca0.75Mn0.3Nb0.7O3	14.4081
Ba0.25Ca0.75Mn0.4Nb0.6O3	14.3529
Ba0.25Ca0.75Mn0.5Nb0.5O3	14.2304
Ba0.25Ca0.75Mn0.7Nb0.3O3	13.8649
Ba0.25Ca0.75Mn0.75Nb0.25O3	13.7764
Ba0.25Ca0.75Mn0.8Nb0.2O3	13.6995
Ba0.25Ca0.75Mn0.2Ni0.8O3	14.5306
Ba0.25Ca0.75Mn0.25Ni0.75O3	14.4244
Ba0.25Ca0.75Mn0.3Ni0.7O3	14.3056
Ba0.25Ca0.75Mn0.5Ni0.5O3	13.7557
Ba0.25Ca0.75Mn0.6Ni0.4O3	13.4819
Ba0.25Ca0.75Mn0.7Ni0.3O3	13.245
Ba0.25Ca0.75Mn0.75Ni0.25O3	13.1475
Ba0.25Ca0.75Mn0.8Ni0.2O3	13.067
Ba0.25Ca0.75Mn0.2Sb0.8O3	14.1281
Ba0.25Ca0.75Mn0.25Sb0.75O3	14.1544
Ba0.25Ca0.75Mn0.3Sb0.7O3	14.1863
Ba0.25Ca0.75Mn0.4Sb0.6O3	14.2609
Ba0.25Ca0.75Mn0.5Sb0.5O3	14.3284
Ba0.25Ca0.75Mn0.6Sb0.4O3	14.3566
Ba0.25Ca0.75Mn0.7Sb0.3O3	14.3265
Ba0.25Ca0.75Mn0.75Sb0.25O3	14.2923
Ba0.25Ca0.75Mn0.8Sb0.2O3	14.2508
Ba0.25Ca0.75Mn0.2Sn0.8O3	14.1532
Ba0.25Ca0.75Mn0.25Sn0.75O3	14.1837
Ba0.25Ca0.75Mn0.3Sn0.7O3	14.2182
Ba0.25Ca0.75Mn0.4Sn0.6O3	14.2869
Ba0.25Ca0.75Mn0.5Sn0.5O3	14.3263
Ba0.25Ca0.75Mn0.6Sn0.4O3	14.3009
Ba0.25Ca0.75Mn0.7Sn0.3O3	14.1996
Ba0.25Ca0.75Mn0.75Sn0.25O3	14.1288
Ba0.25Ca0.75Mn0.8Ta0.2O3	14.1295
Ba0.25Ca0.75Mn0.2Ti0.8O3	13.9491
Ba0.25Ca0.75Mn0.25Ti0.75O3	13.8679
Ba0.25Ca0.75Mn0.3Ti0.7O3	13.7833
Ba0.25Ca0.75Mn0.4Ti0.6O3	13.6099
Ba0.25Ca0.75Mn0.5Ti0.5O3	13.4426
Ba0.25Ca0.75Mn0.6Ti0.4O3	13.2953
Ba0.25Ca0.75Mn0.7Ti0.3O3	13.1802
Ba0.25Ca0.75Mn0.75Ti0.25O3	13.1377
Ba0.25Ca0.75Mn0.8Ti0.2O3	13.1064
Ba0.25Ca0.75Ni0.2Sb0.8O3	14.1542
Ba0.25Ca0.75Ni0.25Sb0.75O3	14.1968
Ba0.25Ca0.75Ni0.3Sb0.7O3	14.253
Ba0.25Ca0.75Ni0.4Sb0.6O3	14.4088
Ba0.25Ca0.75Ni0.5Sb0.5O3	14.6129
Ba0.25Ca0.75Ni0.6Sb0.4O3	14.8308
Ba0.25Ca0.75Ni0.7Sb0.3O3	15.0096
Ba0.25Ca0.75Ni0.75Sb0.25O3	15.0679
Ba0.25Ca0.75Ni0.8Sb0.2O3	15.0992
Ba0.25Ca0.75Ni0.2Sn0.8O3	14.1919
Ba0.25Ca0.75Ni0.25Sn0.75O3	14.2442
Ba0.25Ca0.75Ni0.3Sn0.7O3	14.3093
Ba0.25Ca0.75Ni0.4Sn0.6O3	14.475
Ba0.25Ca0.75Ni0.5Sn0.5O3	14.6663
Ba0.25Ca0.75Ni0.6Sn0.4O3	14.8393
Ba0.25Ca0.75Ni0.7Sn0.3O3	14.9457
Ba0.25Ca0.75Ni0.75Sn0.25O3	14.9636
Ba0.25Ca0.75Ni0.8Sn0.2O3	14.9565
Ba0.25Ca0.75Ni0.7Ta0.3O3	14.1073
Ba0.25Ca0.75Ni0.75Ta0.25O3	14.1617
Ba0.25Ca0.75Ni0.8Ta0.2O3	14.2537
Ba0.25Ca0.75Ni0.2Ti0.8O3	14.6627
Ba0.25Ca0.75Ni0.25Ti0.75O3	14.6299
Ba0.25Ca0.75Ni0.3Ti0.7O3	14.5908
Ba0.25Ca0.75Ni0.4Ti0.6O3	14.4976
Ba0.25Ca0.75Ni0.5Ti0.5O3	14.3921
Ba0.25Ca0.75Ni0.6Ti0.4O3	14.2847
Ba0.25Ca0.75Ni0.7Ti0.3O3	14.1855
Ba0.25Ca0.75Ni0.75Ti0.25O3	14.1418
Ba0.25Ca0.75Ni0.8Ti0.2O3	14.103
Ba0.3Ca0.7Al0.2Co0.8O3	13.9515
Ba0.3Ca0.7Al0.25Co0.75O3	13.9232
Ba0.3Ca0.7Al0.3Co0.7O3	13.8942
Ba0.3Ca0.7Al0.4Co0.6O3	13.8364
Ba0.3Ca0.7Al0.5Co0.5O3	13.7825
Ba0.3Ca0.7Al0.6Co0.4O3	13.7373
Ba0.3Ca0.7Al0.7Co0.3O3	13.7043
Ba0.3Ca0.7Al0.75Co0.25O3	13.6934
Ba0.3Ca0.7Al0.8Co0.2O3	13.6863
Ba0.3Ca0.7Al0.2Cr0.8O3	13.8126
Ba0.3Ca0.7Al0.25Cr0.75O3	13.7843
Ba0.3Ca0.7Al0.3Cr0.7O3	13.7566
Ba0.3Ca0.7Al0.4Cr0.6O3	13.705
Ba0.3Ca0.7Al0.5Cr0.5O3	13.6616
Ba0.3Ca0.7Al0.6Cr0.4O3	13.6298
Ba0.3Ca0.7Al0.7Cr0.3O3	13.6122
Ba0.3Ca0.7Al0.75Cr0.25O3	13.6092
Ba0.3Ca0.7Al0.8Cr0.2O3	13.61
Ba0.3Ca0.7Al0.3Cu0.7O3	13.9747
Ba0.3Ca0.7Al0.4Cu0.6O3	13.9114
Ba0.3Ca0.7Al0.5Cu0.5O3	13.8457
Ba0.3Ca0.7Al0.6Cu0.4O3	13.7847
Ba0.3Ca0.7Al0.7Cu0.3O3	13.7358
Ba0.3Ca0.7Al0.75Cu0.25O3	13.7177
Ba0.3Ca0.7Al0.8Cu0.2O3	13.7047
Ba0.3Ca0.7Al0.2Fe0.8O3	13.8317
Ba0.3Ca0.7Al0.25Fe0.75O3	13.8048
Ba0.3Ca0.7Al0.3Fe0.7O3	13.7783
Ba0.3Ca0.7Al0.4Fe0.6O3	13.7283
Ba0.3Ca0.7Al0.5Fe0.5O3	13.6855
Ba0.3Ca0.7Al0.6Fe0.4O3	13.6533
Ba0.3Ca0.7Al0.7Fe0.3O3	13.6341
Ba0.3Ca0.7Al0.75Fe0.25O3	13.6298
Ba0.3Ca0.7Al0.8Fe0.2O3	13.6293
Ba0.3Ca0.7Al0.2Ga0.8O3	13.9082
Ba0.3Ca0.7Al0.25Ga0.75O3	13.8857
Ba0.3Ca0.7Al0.3Ga0.7O3	13.8631
Ba0.3Ca0.7Al0.4Ga0.6O3	13.8192
Ba0.3Ca0.7Al0.5Ga0.5O3	13.7802
Ba0.3Ca0.7Al0.6Ga0.4O3	13.7498
Ba0.3Ca0.7Al0.7Ga0.3O3	13.7307
Ba0.3Ca0.7Al0.75Ga0.25O3	13.7259
Ba0.3Ca0.7Al0.8Ga0.2O3	13.7245
Ba0.3Ca0.7Al0.2Mg0.8O3	13.7849
Ba0.3Ca0.7Al0.25Mg0.75O3	13.7687
Ba0.3Ca0.7Al0.3Mg0.7O3	13.7535
Ba0.3Ca0.7Al0.4Mg0.6O3	13.7271
Ba0.3Ca0.7Al0.5Mg0.5O3	13.7073
Ba0.3Ca0.7Al0.6Mg0.4O3	13.6953
Ba0.3Ca0.7Al0.7Mg0.3O3	13.6921
Ba0.3Ca0.7Al0.75Mg0.25O3	13.6939
Ba0.3Ca0.7Al0.8Mg0.2O3	13.6978
Ba0.3Ca0.7Al0.2Mn0.8O3	13.6867
Ba0.3Ca0.7Al0.25Mn0.75O3	13.663
Ba0.3Ca0.7Al0.3Mn0.7O3	13.6409
Ba0.3Ca0.7Al0.4Mn0.6O3	13.6031
Ba0.3Ca0.7Al0.5Mn0.5O3	13.5758
Ba0.3Ca0.7Al0.6Mn0.4O3	13.5613
Ba0.3Ca0.7Al0.7Mn0.3O3	13.5606
Ba0.3Ca0.7Al0.75Mn0.25O3	13.5654
Ba0.3Ca0.7Al0.8Mn0.2O3	13.5737
Ba0.3Ca0.7Al0.4Nb0.6O3	13.9863
Ba0.3Ca0.7Al0.5Nb0.5O3	13.9312
Ba0.3Ca0.7Al0.6Nb0.4O3	13.8727
Ba0.3Ca0.7Al0.7Nb0.3O3	13.8219
Ba0.3Ca0.7Al0.75Nb0.25O3	13.8027
Ba0.3Ca0.7Al0.8Nb0.2O3	13.7893
Ba0.3Ca0.7Al0.2Ni0.8O3	13.9279
Ba0.3Ca0.7Al0.25Ni0.75O3	13.8973
Ba0.3Ca0.7Al0.3Ni0.7O3	13.8658
Ba0.3Ca0.7Al0.4Ni0.6O3	13.8031
Ba0.3Ca0.7Al0.5Ni0.5O3	13.745
Ba0.3Ca0.7Al0.6Ni0.4O3	13.6968
Ba0.3Ca0.7Al0.7Ni0.3O3	13.6628
Ba0.3Ca0.7Al0.75Ni0.25O3	13.6521
Ba0.3Ca0.7Al0.8Ni0.2O3	13.6459
Ba0.3Ca0.7Al0.7Sb0.3O3	13.9594
Ba0.3Ca0.7Al0.75Sb0.25O3	13.9356
Ba0.3Ca0.7Al0.8Sb0.2O3	13.9153
Ba0.3Ca0.7Al0.6Sn0.4O3	13.9765
Ba0.3Ca0.7Al0.7Sn0.3O3	13.9149
Ba0.3Ca0.7Al0.75Sn0.25O3	13.8852
Ba0.3Ca0.7Al0.8Sn0.2O3	13.8601
Ba0.3Ca0.7Al0.2Ti0.8O3	13.791
Ba0.3Ca0.7Al0.25Ti0.75O3	13.7692
Ba0.3Ca0.7Al0.3Ti0.7O3	13.7484
Ba0.3Ca0.7Al0.4Ti0.6O3	13.711
Ba0.3Ca0.7Al0.5Ti0.5O3	13.6816
Ba0.3Ca0.7Al0.6Ti0.4O3	13.6623
Ba0.3Ca0.7Al0.7Ti0.3O3	13.6546
Ba0.3Ca0.7Al0.75Ti0.25O3	13.6553
Ba0.3Ca0.7Al0.8Ti0.2O3	13.659
Ba0.3Ca0.7Co0.2Cr0.8O3	14.7243
Ba0.3Ca0.7Co0.25Cr0.75O3	14.6587
Ba0.3Ca0.7Co0.3Cr0.7O3	14.5839
Ba0.3Ca0.7Co0.4Cr0.6O3	14.4138
Ba0.3Ca0.7Co0.5Cr0.5O3	14.2299
Ba0.3Ca0.7Co0.7Cr0.3O3	13.8932
Ba0.3Ca0.7Co0.75Cr0.25O3	13.8274
Ba0.3Ca0.7Co0.8Cr0.2O3	13.7719
Ba0.3Ca0.7Co0.2Cu0.8O3	15.3593
Ba0.3Ca0.7Co0.25Cu0.75O3	15.3514
Ba0.3Ca0.7Co0.3Cu0.7O3	15.3215
Ba0.3Ca0.7Co0.4Cu0.6O3	15.197
Ba0.3Ca0.7Co0.5Cu0.5O3	14.9988
Ba0.3Ca0.7Co0.6Cu0.4O3	14.7531
Ba0.3Ca0.7Co0.7Cu0.3O3	14.4946
Ba0.3Ca0.7Co0.75Cu0.25O3	14.3716
Ba0.3Ca0.7Co0.8Cu0.2O3	14.258
Ba0.3Ca0.7Co0.2Fe0.8O3	15.1082
Ba0.3Ca0.7Co0.25Fe0.75O3	15.0684
Ba0.3Ca0.7Co0.3Fe0.7O3	15.0162
Ba0.3Ca0.7Co0.4Fe0.6O3	14.8783
Ba0.3Ca0.7Co0.5Fe0.5O3	14.7062
Ba0.3Ca0.7Co0.6Fe0.4O3	14.5163
Ba0.3Ca0.7Co0.7Fe0.3O3	14.3273
Ba0.3Ca0.7Co0.75Fe0.25O3	14.2387
Ba0.3Ca0.7Co0.8Fe0.2O3	14.1566
Ba0.3Ca0.7Co0.2Ga0.8O3	14.854
Ba0.3Ca0.7Co0.25Ga0.75O3	14.8312
Ba0.3Ca0.7Co0.3Ga0.7O3	14.7976
Ba0.3Ca0.7Co0.4Ga0.6O3	14.7011
Ba0.3Ca0.7Co0.5Ga0.5O3	14.5737
Ba0.3Ca0.7Co0.6Ga0.4O3	14.4296
Ba0.3Ca0.7Co0.7Ga0.3O3	14.285
Ba0.3Ca0.7Co0.75Ga0.25O3	14.2174
Ba0.3Ca0.7Co0.8Ga0.2O3	14.1553
Ba0.3Ca0.7Co0.2Mg0.8O3	14.1332
Ba0.3Ca0.7Co0.25Mg0.75O3	14.1045
Ba0.3Ca0.7Co0.5Mg0.5O3	13.9337
Ba0.3Ca0.7Co0.6Mg0.4O3	13.8662
Ba0.3Ca0.7Co0.7Mg0.3O3	13.8086
Ba0.3Ca0.7Co0.75Mg0.25O3	13.7853
Ba0.3Ca0.7Co0.8Mg0.2O3	13.7662
Ba0.3Ca0.7Co0.2Mn0.8O3	14.3483
Ba0.3Ca0.7Co0.25Mn0.75O3	14.3236
Ba0.3Ca0.7Co0.3Mn0.7O3	14.294
Ba0.3Ca0.7Co0.4Mn0.6O3	14.2225
Ba0.3Ca0.7Co0.5Mn0.5O3	14.1397
Ba0.3Ca0.7Co0.7Mn0.3O3	13.9732
Ba0.3Ca0.7Co0.75Mn0.25O3	13.9379
Ba0.3Ca0.7Co0.8Mn0.2O3	13.907
Ba0.3Ca0.7Co0.2Nb0.8O3	14.6647
Ba0.3Ca0.7Co0.25Nb0.75O3	14.7351
Ba0.3Ca0.7Co0.3Nb0.7O3	14.7986
Ba0.3Ca0.7Co0.4Nb0.6O3	14.892
Ba0.3Ca0.7Co0.5Nb0.5O3	14.9237
Ba0.3Ca0.7Co0.6Nb0.4O3	14.8874
Ba0.3Ca0.7Co0.7Nb0.3O3	14.7946
Ba0.3Ca0.7Co0.75Nb0.25O3	14.7346
Ba0.3Ca0.7Co0.8Nb0.2O3	14.6704
Ba0.3Ca0.7Co0.2Ni0.8O3	15.3658
Ba0.3Ca0.7Co0.25Ni0.75O3	15.3097
Ba0.3Ca0.7Co0.3Ni0.7O3	15.2356
Ba0.3Ca0.7Co0.4Ni0.6O3	15.0405
Ba0.3Ca0.7Co0.5Ni0.5O3	14.7995
Ba0.3Ca0.7Co0.6Ni0.4O3	14.5384
Ba0.3Ca0.7Co0.7Ni0.3O3	14.2853
Ba0.3Ca0.7Co0.75Ni0.25O3	14.1699
Ba0.3Ca0.7Co0.2Sb0.8O3	14.1598
Ba0.3Ca0.7Co0.25Sb0.75O3	14.2049
Ba0.3Ca0.7Co0.3Sb0.7O3	14.2642
Ba0.3Ca0.7Co0.4Sb0.6O3	14.428
Ba0.3Ca0.7Co0.5Sb0.5O3	14.641
Ba0.3Ca0.7Co0.6Sb0.4O3	14.8662
Ba0.3Ca0.7Co0.7Sb0.3O3	15.0491
Ba0.3Ca0.7Co0.75Sb0.25O3	15.1086
Ba0.3Ca0.7Co0.8Sb0.2O3	15.1411
Ba0.3Ca0.7Co0.2Sn0.8O3	14.1997
Ba0.3Ca0.7Co0.25Sn0.75O3	14.255
Ba0.3Ca0.7Co0.3Sn0.7O3	14.3237
Ba0.3Ca0.7Co0.4Sn0.6O3	14.4974
Ba0.3Ca0.7Co0.5Sn0.5O3	14.6959
Ba0.3Ca0.7Co0.6Sn0.4O3	14.8718
Ba0.3Ca0.7Co0.7Sn0.3O3	14.975
Ba0.3Ca0.7Co0.75Sn0.25O3	14.9896
Ba0.3Ca0.7Co0.8Sn0.2O3	14.979
Ba0.3Ca0.7Co0.7Ta0.3O3	14.1069
Ba0.3Ca0.7Co0.75Ta0.25O3	14.1624
Ba0.3Ca0.7Co0.8Ta0.2O3	14.2586
Ba0.3Ca0.7Co0.2Ti0.8O3	14.621
Ba0.3Ca0.7Co0.25Ti0.75O3	14.586
Ba0.3Ca0.7Co0.3Ti0.7O3	14.5445
Ba0.3Ca0.7Co0.4Ti0.6O3	14.4459
Ba0.3Ca0.7Co0.5Ti0.5O3	14.3341
Ba0.3Ca0.7Co0.6Ti0.4O3	14.2201
Ba0.3Ca0.7Co0.7Ti0.3O3	14.1148
Ba0.3Ca0.7Cr0.2Cu0.8O3	15.119
Ba0.3Ca0.7Cr0.25Cu0.75O3	15.0842
Ba0.3Ca0.7Cr0.3Cu0.7O3	15.0264
Ba0.3Ca0.7Cr0.4Cu0.6O3	14.8444
Ba0.3Ca0.7Cr0.5Cu0.5O3	14.5877
Ba0.3Ca0.7Cr0.6Cu0.4O3	14.2852
Ba0.3Ca0.7Cr0.7Cu0.3O3	13.9751
Ba0.3Ca0.7Cr0.75Cu0.25O3	13.8298
Ba0.3Ca0.7Cr0.8Cu0.2O3	13.6971
Ba0.3Ca0.7Cr0.2Fe0.8O3	14.7893
Ba0.3Ca0.7Cr0.25Fe0.75O3	14.7164
Ba0.3Ca0.7Cr0.3Fe0.7O3	14.631
Ba0.3Ca0.7Cr0.4Fe0.6O3	14.4284
Ba0.3Ca0.7Cr0.5Fe0.5O3	14.1965
Ba0.3Ca0.7Cr0.6Fe0.4O3	13.955
Ba0.3Ca0.7Cr0.7Fe0.3O3	13.7252
Ba0.3Ca0.7Cr0.75Fe0.25O3	13.6211
Ba0.3Ca0.7Cr0.8Fe0.2O3	13.5272
Ba0.3Ca0.7Cr0.2Ga0.8O3	14.6404
Ba0.3Ca0.7Cr0.25Ga0.75O3	14.5941
Ba0.3Ca0.7Cr0.3Ga0.7O3	14.5365
Ba0.3Ca0.7Cr0.4Ga0.6O3	14.3916
Ba0.3Ca0.7Cr0.5Ga0.5O3	14.2172
Ba0.3Ca0.7Cr0.7Ga0.3O3	13.8491
Ba0.3Ca0.7Cr0.75Ga0.25O3	13.7669
Ba0.3Ca0.7Cr0.8Ga0.2O3	13.6928
Ba0.3Ca0.7Cr0.2Mg0.8O3	13.9676
Ba0.3Ca0.7Cr0.25Mg0.75O3	13.9206
Ba0.3Ca0.7Cr0.3Mg0.7O3	13.8706
Ba0.3Ca0.7Cr0.4Mg0.6O3	13.7642
Ba0.3Ca0.7Cr0.5Mg0.5O3	13.6557
Ba0.3Ca0.7Cr0.6Mg0.4O3	13.553
Ba0.3Ca0.7Cr0.7Mg0.3O3	13.4644
Ba0.3Ca0.7Cr0.75Mg0.25O3	13.4276
Ba0.3Ca0.7Cr0.8Mg0.2O3	13.3969
Ba0.3Ca0.7Cr0.2Mn0.8O3	14.1148
Ba0.3Ca0.7Cr0.3Mn0.7O3	13.9992
Ba0.3Ca0.7Cr0.4Mn0.6O3	13.8641
Ba0.3Ca0.7Cr0.5Mn0.5O3	13.7188
Ba0.3Ca0.7Cr0.6Mn0.4O3	13.5753
Ba0.3Ca0.7Cr0.7Mn0.3O3	13.4465
Ba0.3Ca0.7Cr0.75Mn0.25O3	13.3914
Ba0.3Ca0.7Cr0.8Mn0.2O3	13.3443
Ba0.3Ca0.7Cr0.2Nb0.8O3	14.5746
Ba0.3Ca0.7Cr0.25Nb0.75O3	14.6218
Ba0.3Ca0.7Cr0.3Nb0.7O3	14.658
Ba0.3Ca0.7Cr0.4Nb0.6O3	14.6839
Ba0.3Ca0.7Cr0.5Nb0.5O3	14.6327
Ba0.3Ca0.7Cr0.6Nb0.4O3	14.5046
Ba0.3Ca0.7Cr0.7Nb0.3O3	14.3225
Ba0.3Ca0.7Cr0.75Nb0.25O3	14.2235
Ba0.3Ca0.7Cr0.8Nb0.2O3	14.1267
Ba0.3Ca0.7Cr0.2Ni0.8O3	15.046
Ba0.3Ca0.7Cr0.25Ni0.75O3	14.9625
Ba0.3Ca0.7Cr0.3Ni0.7O3	14.8612
Ba0.3Ca0.7Cr0.4Ni0.6O3	14.6127
Ba0.3Ca0.7Cr0.5Ni0.5O3	14.3209
Ba0.3Ca0.7Cr0.7Ni0.3O3	13.7218
Ba0.3Ca0.7Cr0.75Ni0.25O3	13.5905
Ba0.3Ca0.7Cr0.8Ni0.2O3	13.4732
Ba0.3Ca0.7Cr0.2Sb0.8O3	14.1467
Ba0.3Ca0.7Cr0.25Sb0.75O3	14.184
Ba0.3Ca0.7Cr0.3Sb0.7O3	14.2316
Ba0.3Ca0.7Cr0.4Sb0.6O3	14.3551
Ba0.3Ca0.7Cr0.5Sb0.5O3	14.4954
Ba0.3Ca0.7Cr0.6Sb0.4O3	14.6084
Ba0.3Ca0.7Cr0.7Sb0.3O3	14.6488
Ba0.3Ca0.7Cr0.75Sb0.25O3	14.6352
Ba0.3Ca0.7Cr0.8Sb0.2O3	14.6009
Ba0.3Ca0.7Cr0.2Sn0.8O3	14.1812
Ba0.3Ca0.7Cr0.25Sn0.75O3	14.2266
Ba0.3Ca0.7Cr0.3Sn0.7O3	14.2813
Ba0.3Ca0.7Cr0.4Sn0.6O3	14.4093
Ba0.3Ca0.7Cr0.5Sn0.5O3	14.5306
Ba0.3Ca0.7Cr0.6Sn0.4O3	14.5938
Ba0.3Ca0.7Cr0.7Sn0.3O3	14.5598
Ba0.3Ca0.7Cr0.75Sn0.25O3	14.5056
Ba0.3Ca0.7Cr0.8Sn0.2O3	14.4328
Ba0.3Ca0.7Cr0.75Ta0.25O3	14.1306
Ba0.3Ca0.7Cr0.8Ta0.2O3	14.1873
Ba0.3Ca0.7Cr0.2Ti0.8O3	14.393
Ba0.3Ca0.7Cr0.25Ti0.75O3	14.3325
Ba0.3Ca0.7Cr0.3Ti0.7O3	14.265
Ba0.3Ca0.7Cr0.4Ti0.6O3	14.1139
Ba0.3Ca0.7Cr0.5Ti0.5O3	13.9512
Ba0.3Ca0.7Cr0.6Ti0.4O3	13.7903
Ba0.3Ca0.7Cr0.7Ti0.3O3	13.6449
Ba0.3Ca0.7Cr0.75Ti0.25O3	13.582
Ba0.3Ca0.7Cr0.8Ti0.2O3	13.5272
Ba0.3Ca0.7Cu0.2Fe0.8O3	14.666
Ba0.3Ca0.7Cu0.25Fe0.75O3	14.6606
Ba0.3Ca0.7Cu0.3Fe0.7O3	14.6493
Ba0.3Ca0.7Cu0.4Fe0.6O3	14.6104
Ba0.3Ca0.7Cu0.5Fe0.5O3	14.5542
Ba0.3Ca0.7Cu0.6Fe0.4O3	14.4879
Ba0.3Ca0.7Cu0.7Fe0.3O3	14.419
Ba0.3Ca0.7Cu0.75Fe0.25O3	14.3858
Ba0.3Ca0.7Cu0.8Fe0.2O3	14.3543
Ba0.3Ca0.7Cu0.2Ga0.8O3	14.52
Ba0.3Ca0.7Cu0.25Ga0.75O3	14.5165
Ba0.3Ca0.7Cu0.3Ga0.7O3	14.5082
Ba0.3Ca0.7Cu0.4Ga0.6O3	14.4786
Ba0.3Ca0.7Cu0.5Ga0.5O3	14.436
Ba0.3Ca0.7Cu0.6Ga0.4O3	14.3866
Ba0.3Ca0.7Cu0.7Ga0.3O3	14.3368
Ba0.3Ca0.7Cu0.75Ga0.25O3	14.3133
Ba0.3Ca0.7Cu0.8Ga0.2O3	14.2913
Ba0.3Ca0.7Cu0.2Mn0.8O3	14.1194
Ba0.3Ca0.7Cu0.25Mn0.75O3	14.1241
Ba0.3Ca0.7Cu0.3Mn0.7O3	14.1292
Ba0.3Ca0.7Cu0.4Mn0.6O3	14.1406
Ba0.3Ca0.7Cu0.5Mn0.5O3	14.1527
Ba0.3Ca0.7Cu0.6Mn0.4O3	14.1645
Ba0.3Ca0.7Cu0.7Mn0.3O3	14.1752
Ba0.3Ca0.7Cu0.75Mn0.25O3	14.1797
Ba0.3Ca0.7Cu0.8Mn0.2O3	14.1836
Ba0.3Ca0.7Cu0.2Nb0.8O3	14.4142
Ba0.3Ca0.7Cu0.25Nb0.75O3	14.4588
Ba0.3Ca0.7Cu0.3Nb0.7O3	14.5014
Ba0.3Ca0.7Cu0.4Nb0.6O3	14.5751
Ba0.3Ca0.7Cu0.5Nb0.5O3	14.6253
Ba0.3Ca0.7Cu0.6Nb0.4O3	14.6467
Ba0.3Ca0.7Cu0.7Nb0.3O3	14.6388
Ba0.3Ca0.7Cu0.75Nb0.25O3	14.6248
Ba0.3Ca0.7Cu0.8Nb0.2O3	14.605
Ba0.3Ca0.7Cu0.2Ni0.8O3	14.8577
Ba0.3Ca0.7Cu0.25Ni0.75O3	14.8333
Ba0.3Ca0.7Cu0.3Ni0.7O3	14.7994
Ba0.3Ca0.7Cu0.4Ni0.6O3	14.7083
Ba0.3Ca0.7Cu0.5Ni0.5O3	14.5973
Ba0.3Ca0.7Cu0.6Ni0.4O3	14.4815
Ba0.3Ca0.7Cu0.7Ni0.3O3	14.3747
Ba0.3Ca0.7Cu0.75Ni0.25O3	14.328
Ba0.3Ca0.7Cu0.8Ni0.2O3	14.2869
Ba0.3Ca0.7Cu0.2Sb0.8O3	14.1232
Ba0.3Ca0.7Cu0.25Sb0.75O3	14.1512
Ba0.3Ca0.7Cu0.3Sb0.7O3	14.1884
Ba0.3Ca0.7Cu0.4Sb0.6O3	14.2946
Ba0.3Ca0.7Cu0.5Sb0.5O3	14.442
Ba0.3Ca0.7Cu0.6Sb0.4O3	14.6137
Ba0.3Ca0.7Cu0.7Sb0.3O3	14.7734
Ba0.3Ca0.7Cu0.75Sb0.25O3	14.8341
Ba0.3Ca0.7Cu0.8Sb0.2O3	14.8743
Ba0.3Ca0.7Cu0.2Sn0.8O3	14.1466
Ba0.3Ca0.7Cu0.25Sn0.75O3	14.1803
Ba0.3Ca0.7Cu0.3Sn0.7O3	14.2227
Ba0.3Ca0.7Cu0.4Sn0.6O3	14.3338
Ba0.3Ca0.7Cu0.5Sn0.5O3	14.4712
Ba0.3Ca0.7Cu0.6Sn0.4O3	14.6123
Ba0.3Ca0.7Cu0.7Sn0.3O3	14.725
Ba0.3Ca0.7Cu0.75Sn0.25O3	14.7606
Ba0.3Ca0.7Cu0.8Sn0.2O3	14.7781
Ba0.3Ca0.7Cu0.75Ta0.25O3	14.128
Ba0.3Ca0.7Cu0.8Ta0.2O3	14.1955
Ba0.3Ca0.7Cu0.2Ti0.8O3	14.3363
Ba0.3Ca0.7Cu0.25Ti0.75O3	14.3314
Ba0.3Ca0.7Cu0.3Ti0.7O3	14.3248
Ba0.3Ca0.7Cu0.4Ti0.6O3	14.3079
Ba0.3Ca0.7Cu0.5Ti0.5O3	14.2882
Ba0.3Ca0.7Cu0.6Ti0.4O3	14.2687
Ba0.3Ca0.7Cu0.7Ti0.3O3	14.2513
Ba0.3Ca0.7Cu0.75Ti0.25O3	14.2437
Ba0.3Ca0.7Cu0.8Ti0.2O3	14.237
Ba0.3Ca0.7Fe0.2Ga0.8O3	14.7953
Ba0.3Ca0.7Fe0.25Ga0.75O3	14.7378
Ba0.3Ca0.7Fe0.3Ga0.7O3	14.6665
Ba0.3Ca0.7Fe0.4Ga0.6O3	14.4871
Ba0.3Ca0.7Fe0.5Ga0.5O3	14.2726
Ba0.3Ca0.7Fe0.7Ga0.3O3	13.8269
Ba0.3Ca0.7Fe0.75Ga0.25O3	13.7293
Ba0.3Ca0.7Fe0.8Ga0.2O3	13.6424
Ba0.3Ca0.7Fe0.2Mg0.8O3	13.9953
Ba0.3Ca0.7Fe0.25Mg0.75O3	13.9374
Ba0.3Ca0.7Fe0.3Mg0.7O3	13.8754
Ba0.3Ca0.7Fe0.4Mg0.6O3	13.7435
Ba0.3Ca0.7Fe0.5Mg0.5O3	13.6087
Ba0.3Ca0.7Fe0.6Mg0.4O3	13.4817
Ba0.3Ca0.7Fe0.7Mg0.3O3	13.3729
Ba0.3Ca0.7Fe0.75Mg0.25O3	13.3282
Ba0.3Ca0.7Fe0.8Mg0.2O3	13.2912
Ba0.3Ca0.7Fe0.2Mn0.8O3	14.2241
Ba0.3Ca0.7Fe0.25Mn0.75O3	14.1567
Ba0.3Ca0.7Fe0.4Mn0.6O3	13.9134
Ba0.3Ca0.7Fe0.5Mn0.5O3	13.732
Ba0.3Ca0.7Fe0.6Mn0.4O3	13.5534
Ba0.3Ca0.7Fe0.7Mn0.3O3	13.3942
Ba0.3Ca0.7Fe0.75Mn0.25O3	13.3267
Ba0.3Ca0.7Fe0.8Mn0.2O3	13.2695
Ba0.3Ca0.7Fe0.2Nb0.8O3	14.6995
Ba0.3Ca0.7Fe0.25Nb0.75O3	14.7581
Ba0.3Ca0.7Fe0.3Nb0.7O3	14.8032
Ba0.3Ca0.7Fe0.4Nb0.6O3	14.836
Ba0.3Ca0.7Fe0.5Nb0.5O3	14.7757
Ba0.3Ca0.7Fe0.6Nb0.4O3	14.6243
Ba0.3Ca0.7Fe0.7Nb0.3O3	14.4123
Ba0.3Ca0.7Fe0.75Nb0.25O3	14.2987
Ba0.3Ca0.7Fe0.8Nb0.2O3	14.1891
Ba0.3Ca0.7Fe0.2Ni0.8O3	15.2975
Ba0.3Ca0.7Fe0.25Ni0.75O3	15.195
Ba0.3Ca0.7Fe0.3Ni0.7O3	15.0705
Ba0.3Ca0.7Fe0.4Ni0.6O3	14.7655
Ba0.3Ca0.7Fe0.5Ni0.5O3	14.4094
Ba0.3Ca0.7Fe0.7Ni0.3O3	13.6881
Ba0.3Ca0.7Fe0.75Ni0.25O3	13.5329
Ba0.3Ca0.7Fe0.8Ni0.2O3	13.3955
Ba0.3Ca0.7Fe0.2Sb0.8O3	14.1669
Ba0.3Ca0.7Fe0.25Sb0.75O3	14.2133
Ba0.3Ca0.7Fe0.3Sb0.7O3	14.2724
Ba0.3Ca0.7Fe0.4Sb0.6O3	14.425
Ba0.3Ca0.7Fe0.5Sb0.5O3	14.5979
Ba0.3Ca0.7Fe0.6Sb0.4O3	14.7384
Ba0.3Ca0.7Fe0.7Sb0.3O3	14.7952
Ba0.3Ca0.7Fe0.75Sb0.25O3	14.7854
Ba0.3Ca0.7Fe0.8Sb0.2O3	14.7526
Ba0.3Ca0.7Fe0.2Sn0.8O3	14.2102
Ba0.3Ca0.7Fe0.25Sn0.75O3	14.2668
Ba0.3Ca0.7Fe0.3Sn0.7O3	14.3347
Ba0.3Ca0.7Fe0.4Sn0.6O3	14.4935
Ba0.3Ca0.7Fe0.5Sn0.5O3	14.6437
Ba0.3Ca0.7Fe0.6Sn0.4O3	14.7241
Ba0.3Ca0.7Fe0.7Sn0.3O3	14.6907
Ba0.3Ca0.7Fe0.75Sn0.25O3	14.6317
Ba0.3Ca0.7Fe0.8Sn0.2O3	14.5521
Ba0.3Ca0.7Fe0.7Ta0.3O3	14.1023
Ba0.3Ca0.7Fe0.75Ta0.25O3	14.1461
Ba0.3Ca0.7Fe0.8Ta0.2O3	14.2174
Ba0.3Ca0.7Fe0.2Ti0.8O3	14.5019
Ba0.3Ca0.7Fe0.25Ti0.75O3	14.4266
Ba0.3Ca0.7Fe0.3Ti0.7O3	14.3428
Ba0.3Ca0.7Fe0.4Ti0.6O3	14.1555
Ba0.3Ca0.7Fe0.5Ti0.5O3	13.9551
Ba0.3Ca0.7Fe0.6Ti0.4O3	13.7589
Ba0.3Ca0.7Fe0.7Ti0.3O3	13.5843
Ba0.3Ca0.7Fe0.75Ti0.25O3	13.51
Ba0.3Ca0.7Fe0.8Ti0.2O3	13.4464
Ba0.3Ca0.7Ga0.2Mg0.8O3	13.7222
Ba0.3Ca0.7Ga0.25Mg0.75O3	13.6897
Ba0.3Ca0.7Ga0.3Mg0.7O3	13.6576
Ba0.3Ca0.7Ga0.4Mg0.6O3	13.5974
Ba0.3Ca0.7Ga0.5Mg0.5O3	13.5463
Ba0.3Ca0.7Ga0.6Mg0.4O3	13.5091
Ba0.3Ca0.7Ga0.7Mg0.3O3	13.4892
Ba0.3Ca0.7Ga0.75Mg0.25O3	13.4864
Ba0.3Ca0.7Ga0.8Mg0.2O3	13.4886
Ba0.3Ca0.7Ga0.2Mn0.8O3	13.7935
Ba0.3Ca0.7Ga0.25Mn0.75O3	13.7662
Ba0.3Ca0.7Ga0.3Mn0.7O3	13.7392
Ba0.3Ca0.7Ga0.4Mn0.6O3	13.6885
Ba0.3Ca0.7Ga0.5Mn0.5O3	13.6457
Ba0.3Ca0.7Ga0.6Mn0.4O3	13.6152
Ba0.3Ca0.7Ga0.7Mn0.3O3	13.6001
Ba0.3Ca0.7Ga0.75Mn0.25O3	13.5991
Ba0.3Ca0.7Ga0.8Mn0.2O3	13.6026
Ba0.3Ca0.7Ga0.2Nb0.8O3	14.1866
Ba0.3Ca0.7Ga0.25Nb0.75O3	14.1919
Ba0.3Ca0.7Ga0.3Nb0.7O3	14.193
Ba0.3Ca0.7Ga0.4Nb0.6O3	14.1804
Ba0.3Ca0.7Ga0.5Nb0.5O3	14.1474
Ba0.3Ca0.7Ga0.2Ni0.8O3	14.2361
Ba0.3Ca0.7Ga0.25Ni0.75O3	14.1965
Ba0.3Ca0.7Ga0.3Ni0.7O3	14.1521
Ba0.3Ca0.7Ga0.5Ni0.5O3	13.9478
Ba0.3Ca0.7Ga0.6Ni0.4O3	13.8494
Ba0.3Ca0.7Ga0.7Ni0.3O3	13.7682
Ba0.3Ca0.7Ga0.75Ni0.25O3	13.7369
Ba0.3Ca0.7Ga0.8Ni0.2O3	13.7127
Ba0.3Ca0.7Ga0.25Sb0.75O3	14.1016
Ba0.3Ca0.7Ga0.3Sb0.7O3	14.1155
Ba0.3Ca0.7Ga0.4Sb0.6O3	14.1508
Ba0.3Ca0.7Ga0.5Sb0.5O3	14.1909
Ba0.3Ca0.7Ga0.6Sb0.4O3	14.2262
Ba0.3Ca0.7Ga0.7Sb0.3O3	14.2472
Ba0.3Ca0.7Ga0.75Sb0.25O3	14.2509
Ba0.3Ca0.7Ga0.8Sb0.2O3	14.2502
Ba0.3Ca0.7Ga0.25Sn0.75O3	14.1122
Ba0.3Ca0.7Ga0.3Sn0.7O3	14.1266
Ba0.3Ca0.7Ga0.4Sn0.6O3	14.158
Ba0.3Ca0.7Ga0.5Sn0.5O3	14.1839
Ba0.3Ca0.7Ga0.6Sn0.4O3	14.1926
Ba0.3Ca0.7Ga0.7Sn0.3O3	14.1786
Ba0.3Ca0.7Ga0.75Sn0.25O3	14.1644
Ba0.3Ca0.7Ga0.8Sn0.2O3	14.1475
Ba0.3Ca0.7Ga0.8Ta0.2O3	14.1089
Ba0.3Ca0.7Ga0.2Ti0.8O3	13.9103
Ba0.3Ca0.7Ga0.25Ti0.75O3	13.8798
Ba0.3Ca0.7Ga0.3Ti0.7O3	13.8488
Ba0.3Ca0.7Ga0.4Ti0.6O3	13.7879
Ba0.3Ca0.7Ga0.5Ti0.5O3	13.7329
Ba0.3Ca0.7Ga0.6Ti0.4O3	13.6892
Ba0.3Ca0.7Ga0.7Ti0.3O3	13.6613
Ba0.3Ca0.7Ga0.75Ti0.25O3	13.6542
Ba0.3Ca0.7Ga0.8Ti0.2O3	13.6519
Ba0.3Ca0.7Mg0.2Mn0.8O3	13.7964
Ba0.3Ca0.7Mg0.25Mn0.75O3	13.7824
Ba0.3Ca0.7Mg0.3Mn0.7O3	13.7696
Ba0.3Ca0.7Mg0.4Mn0.6O3	13.7487
Ba0.3Ca0.7Mg0.5Mn0.5O3	13.7349
Ba0.3Ca0.7Mg0.6Mn0.4O3	13.7294
Ba0.3Ca0.7Mg0.7Mn0.3O3	13.7326
Ba0.3Ca0.7Mg0.75Mn0.25O3	13.7373
Ba0.3Ca0.7Mg0.8Mn0.2O3	13.7441
Ba0.3Ca0.7Mg0.4Nb0.6O3	13.9803
Ba0.3Ca0.7Mg0.5Nb0.5O3	13.9434
Ba0.3Ca0.7Mg0.6Nb0.4O3	13.9073
Ba0.3Ca0.7Mg0.7Nb0.3O3	13.8787
Ba0.3Ca0.7Mg0.75Nb0.25O3	13.8692
Ba0.3Ca0.7Mg0.8Nb0.2O3	13.8635
Ba0.3Ca0.7Mg0.2Ni0.8O3	13.9237
Ba0.3Ca0.7Mg0.25Ni0.75O3	13.9055
Ba0.3Ca0.7Mg0.3Ni0.7O3	13.8874
Ba0.3Ca0.7Mg0.4Ni0.6O3	13.8529
Ba0.3Ca0.7Mg0.5Ni0.5O3	13.8228
Ba0.3Ca0.7Mg0.6Ni0.4O3	13.7998
Ba0.3Ca0.7Mg0.7Ni0.3O3	13.7859
Ba0.3Ca0.7Mg0.75Ni0.25O3	13.7828
Ba0.3Ca0.7Mg0.8Ni0.2O3	13.7823
Ba0.3Ca0.7Mg0.7Sb0.3O3	13.9658
Ba0.3Ca0.7Mg0.75Sb0.25O3	13.95
Ba0.3Ca0.7Mg0.8Sb0.2O3	13.9374
Ba0.3Ca0.7Mg0.6Sn0.4O3	13.9791
Ba0.3Ca0.7Mg0.7Sn0.3O3	13.9372
Ba0.3Ca0.7Mg0.75Sn0.25O3	13.9187
Ba0.3Ca0.7Mg0.8Sn0.2O3	13.9041
Ba0.3Ca0.7Mg0.2Ti0.8O3	13.8581
Ba0.3Ca0.7Mg0.25Ti0.75O3	13.8454
Ba0.3Ca0.7Mg0.3Ti0.7O3	13.8336
Ba0.3Ca0.7Mg0.4Ti0.6O3	13.8133
Ba0.3Ca0.7Mg0.5Ti0.5O3	13.7986
Ba0.3Ca0.7Mg0.6Ti0.4O3	13.7905
Ba0.3Ca0.7Mg0.7Ti0.3O3	13.7896
Ba0.3Ca0.7Mg0.75Ti0.25O3	13.7918
Ba0.3Ca0.7Mg0.8Ti0.2O3	13.7958
Ba0.3Ca0.7Mn0.2Nb0.8O3	14.3748
Ba0.3Ca0.7Mn0.25Nb0.75O3	14.3781
Ba0.3Ca0.7Mn0.3Nb0.7O3	14.3669
Ba0.3Ca0.7Mn0.4Nb0.6O3	14.2936
Ba0.3Ca0.7Mn0.5Nb0.5O3	14.1513
Ba0.3Ca0.7Mn0.6Nb0.4O3	13.9587
Ba0.3Ca0.7Mn0.7Nb0.3O3	13.7542
Ba0.3Ca0.7Mn0.75Nb0.25O3	13.6623
Ba0.3Ca0.7Mn0.8Nb0.2O3	13.5845
Ba0.3Ca0.7Mn0.2Ni0.8O3	14.4455
Ba0.3Ca0.7Mn0.25Ni0.75O3	14.3273
Ba0.3Ca0.7Mn0.3Ni0.7O3	14.1959
Ba0.3Ca0.7Mn0.4Ni0.6O3	13.9045
Ba0.3Ca0.7Mn0.5Ni0.5O3	13.5972
Ba0.3Ca0.7Mn0.6Ni0.4O3	13.3038
Ba0.3Ca0.7Mn0.7Ni0.3O3	13.0535
Ba0.3Ca0.7Mn0.75Ni0.25O3	12.9524
Ba0.3Ca0.7Mn0.8Ni0.2O3	12.8703
Ba0.3Ca0.7Mn0.2Sb0.8O3	14.1271
Ba0.3Ca0.7Mn0.25Sb0.75O3	14.1523
Ba0.3Ca0.7Mn0.3Sb0.7O3	14.1824
Ba0.3Ca0.7Mn0.4Sb0.6O3	14.25
Ba0.3Ca0.7Mn0.5Sb0.5O3	14.3043
Ba0.3Ca0.7Mn0.6Sb0.4O3	14.3132
Ba0.3Ca0.7Mn0.7Sb0.3O3	14.2619
Ba0.3Ca0.7Mn0.75Sb0.25O3	14.2189
Ba0.3Ca0.7Mn0.8Sb0.2O3	14.1713
Ba0.3Ca0.7Mn0.2Sn0.8O3	14.1512
Ba0.3Ca0.7Mn0.25Sn0.75O3	14.1801
Ba0.3Ca0.7Mn0.3Sn0.7O3	14.2118
Ba0.3Ca0.7Mn0.4Sn0.6O3	14.271
Ba0.3Ca0.7Mn0.5Sn0.5O3	14.2936
Ba0.3Ca0.7Mn0.6Sn0.4O3	14.2445
Ba0.3Ca0.7Mn0.7Sn0.3O3	14.118
Ba0.3Ca0.7Mn0.8Sn0.2O3	13.9541
Ba0.3Ca0.7Mn0.8Ta0.2O3	14.1144
Ba0.3Ca0.7Mn0.2Ti0.8O3	13.8108
Ba0.3Ca0.7Mn0.25Ti0.75O3	13.7238
Ba0.3Ca0.7Mn0.3Ti0.7O3	13.6339
Ba0.3Ca0.7Mn0.4Ti0.6O3	13.4515
Ba0.3Ca0.7Mn0.5Ti0.5O3	13.2781
Ba0.3Ca0.7Mn0.6Ti0.4O3	13.1283
Ba0.3Ca0.7Mn0.7Ti0.3O3	13.0148
Ba0.3Ca0.7Mn0.75Ti0.25O3	12.9748
Ba0.3Ca0.7Mn0.8Ti0.2O3	12.9469
Ba0.3Ca0.7Ni0.2Sb0.8O3	14.1497
Ba0.3Ca0.7Ni0.25Sb0.75O3	14.19
Ba0.3Ca0.7Ni0.3Sb0.7O3	14.2428
Ba0.3Ca0.7Ni0.4Sb0.6O3	14.3894
Ba0.3Ca0.7Ni0.5Sb0.5O3	14.5822
Ba0.3Ca0.7Ni0.6Sb0.4O3	14.7909
Ba0.3Ca0.7Ni0.7Sb0.3O3	14.9691
Ba0.3Ca0.7Ni0.75Sb0.25O3	15.0319
Ba0.3Ca0.7Ni0.8Sb0.2O3	15.071
Ba0.3Ca0.7Ni0.2Sn0.8O3	14.1849
Ba0.3Ca0.7Ni0.25Sn0.75O3	14.2338
Ba0.3Ca0.7Ni0.3Sn0.7O3	14.2946
Ba0.3Ca0.7Ni0.4Sn0.6O3	14.4486
Ba0.3Ca0.7Ni0.5Sn0.5O3	14.6264
Ba0.3Ca0.7Ni0.6Sn0.4O3	14.7886
Ba0.3Ca0.7Ni0.7Sn0.3O3	14.8933
Ba0.3Ca0.7Ni0.75Sn0.25O3	14.9153
Ba0.3Ca0.7Ni0.8Sn0.2O3	14.9156
Ba0.3Ca0.7Ni0.7Ta0.3O3	14.1025
Ba0.3Ca0.7Ni0.75Ta0.25O3	14.1534
Ba0.3Ca0.7Ni0.8Ta0.2O3	14.2431
Ba0.3Ca0.7Ni0.2Ti0.8O3	14.4975
Ba0.3Ca0.7Ni0.25Ti0.75O3	14.4672
Ba0.3Ca0.7Ni0.3Ti0.7O3	14.432
Ba0.3Ca0.7Ni0.4Ti0.6O3	14.3506
Ba0.3Ca0.7Ni0.5Ti0.5O3	14.2614
Ba0.3Ca0.7Ni0.6Ti0.4O3	14.1738
Ba0.4Ca0.6Al0.2Co0.8O3	13.8768
Ba0.4Ca0.6Al0.25Co0.75O3	13.8414
Ba0.4Ca0.6Al0.3Co0.7O3	13.8055
Ba0.4Ca0.6Al0.4Co0.6O3	13.7345
Ba0.4Ca0.6Al0.5Co0.5O3	13.6696
Ba0.4Ca0.6Al0.6Co0.4O3	13.616
Ba0.4Ca0.6Al0.7Co0.3O3	13.5785
Ba0.4Ca0.6Al0.75Co0.25O3	13.5668
Ba0.4Ca0.6Al0.8Co0.2O3	13.56
Ba0.4Ca0.6Al0.2Cr0.8O3	13.7096
Ba0.4Ca0.6Al0.25Cr0.75O3	13.6749
Ba0.4Ca0.6Al0.3Cr0.7O3	13.6411
Ba0.4Ca0.6Al0.4Cr0.6O3	13.5788
Ba0.4Ca0.6Al0.5Cr0.5O3	13.5276
Ba0.4Ca0.6Al0.6Cr0.4O3	13.4914
Ba0.4Ca0.6Al0.7Cr0.3O3	13.4732
Ba0.4Ca0.6Al0.75Cr0.25O3	13.4713
Ba0.4Ca0.6Al0.8Cr0.2O3	13.4743
Ba0.4Ca0.6Al0.2Cu0.8O3	13.9918
Ba0.4Ca0.6Al0.25Cu0.75O3	13.9584
Ba0.4Ca0.6Al0.3Cu0.7O3	13.9218
Ba0.4Ca0.6Al0.4Cu0.6O3	13.842
Ba0.4Ca0.6Al0.5Cu0.5O3	13.7602
Ba0.4Ca0.6Al0.6Cu0.4O3	13.6852
Ba0.4Ca0.6Al0.7Cu0.3O3	13.6262
Ba0.4Ca0.6Al0.75Cu0.25O3	13.6049
Ba0.4Ca0.6Al0.8Cu0.2O3	13.59
Ba0.4Ca0.6Al0.2Fe0.8O3	13.7184
Ba0.4Ca0.6Al0.25Fe0.75O3	13.6853
Ba0.4Ca0.6Al0.3Fe0.7O3	13.653
Ba0.4Ca0.6Al0.4Fe0.6O3	13.5932
Ba0.4Ca0.6Al0.5Fe0.5O3	13.5433
Ba0.4Ca0.6Al0.6Fe0.4O3	13.5073
Ba0.4Ca0.6Al0.7Fe0.3O3	13.4882
Ba0.4Ca0.6Al0.75Fe0.25O3	13.4855
Ba0.4Ca0.6Al0.8Fe0.2O3	13.4873
Ba0.4Ca0.6Al0.2Ga0.8O3	13.8314
Ba0.4Ca0.6Al0.25Ga0.75O3	13.8029
Ba0.4Ca0.6Al0.3Ga0.7O3	13.7745
Ba0.4Ca0.6Al0.4Ga0.6O3	13.7201
Ba0.4Ca0.6Al0.5Ga0.5O3	13.6729
Ba0.4Ca0.6Al0.6Ga0.4O3	13.6371
Ba0.4Ca0.6Al0.7Ga0.3O3	13.6162
Ba0.4Ca0.6Al0.75Ga0.25O3	13.612
Ba0.4Ca0.6Al0.8Ga0.2O3	13.612
Ba0.4Ca0.6Al0.2Mg0.8O3	13.6883
Ba0.4Ca0.6Al0.25Mg0.75O3	13.6683
Ba0.4Ca0.6Al0.3Mg0.7O3	13.6497
Ba0.4Ca0.6Al0.4Mg0.6O3	13.6176
Ba0.4Ca0.6Al0.5Mg0.5O3	13.5943
Ba0.4Ca0.6Al0.6Mg0.4O3	13.5812
Ba0.4Ca0.6Al0.7Mg0.3O3	13.5793
Ba0.4Ca0.6Al0.75Mg0.25O3	13.5826
Ba0.4Ca0.6Al0.8Mg0.2O3	13.5887
Ba0.4Ca0.6Al0.2Mn0.8O3	13.5425
Ba0.4Ca0.6Al0.25Mn0.75O3	13.5132
Ba0.4Ca0.6Al0.3Mn0.7O3	13.4861
Ba0.4Ca0.6Al0.4Mn0.6O3	13.4407
Ba0.4Ca0.6Al0.5Mn0.5O3	13.4097
Ba0.4Ca0.6Al0.6Mn0.4O3	13.3954
Ba0.4Ca0.6Al0.7Mn0.3O3	13.3991
Ba0.4Ca0.6Al0.75Mn0.25O3	13.4076
Ba0.4Ca0.6Al0.8Mn0.2O3	13.4204
Ba0.4Ca0.6Al0.3Nb0.7O3	13.9932
Ba0.4Ca0.6Al0.4Nb0.6O3	13.9335
Ba0.4Ca0.6Al0.5Nb0.5O3	13.8613
Ba0.4Ca0.6Al0.6Nb0.4O3	13.7869
Ba0.4Ca0.6Al0.7Nb0.3O3	13.7244
Ba0.4Ca0.6Al0.75Nb0.25O3	13.7019
Ba0.4Ca0.6Al0.8Nb0.2O3	13.687
Ba0.4Ca0.6Al0.2Ni0.8O3	13.8446
Ba0.4Ca0.6Al0.25Ni0.75O3	13.8059
Ba0.4Ca0.6Al0.3Ni0.7O3	13.7665
Ba0.4Ca0.6Al0.4Ni0.6O3	13.6888
Ba0.4Ca0.6Al0.5Ni0.5O3	13.6181
Ba0.4Ca0.6Al0.6Ni0.4O3	13.5609
Ba0.4Ca0.6Al0.7Ni0.3O3	13.5222
Ba0.4Ca0.6Al0.75Ni0.25O3	13.511
Ba0.4Ca0.6Al0.8Ni0.2O3	13.5055
Ba0.4Ca0.6Al0.6Sb0.4O3	13.9642
Ba0.4Ca0.6Al0.7Sb0.3O3	13.8962
Ba0.4Ca0.6Al0.75Sb0.25O3	13.8637
Ba0.4Ca0.6Al0.8Sb0.2O3	13.8367
Ba0.4Ca0.6Al0.5Sn0.5O3	13.9934
Ba0.4Ca0.6Al0.6Sn0.4O3	13.9227
Ba0.4Ca0.6Al0.7Sn0.3O3	13.8389
Ba0.4Ca0.6Al0.75Sn0.25O3	13.8
Ba0.4Ca0.6Al0.8Sn0.2O3	13.7678
Ba0.4Ca0.6Al0.2Ti0.8O3	13.6836
Ba0.4Ca0.6Al0.25Ti0.75O3	13.6569
Ba0.4Ca0.6Al0.3Ti0.7O3	13.6317
Ba0.4Ca0.6Al0.4Ti0.6O3	13.5871
Ba0.4Ca0.6Al0.5Ti0.5O3	13.5531
Ba0.4Ca0.6Al0.6Ti0.4O3	13.5322
Ba0.4Ca0.6Al0.7Ti0.3O3	13.5261
Ba0.4Ca0.6Al0.75Ti0.25O3	13.5287
Ba0.4Ca0.6Al0.8Ti0.2O3	13.5351
Ba0.4Ca0.6Co0.2Cr0.8O3	14.3848
Ba0.4Ca0.6Co0.25Cr0.75O3	14.3227
Ba0.4Ca0.6Co0.3Cr0.7O3	14.2541
Ba0.4Ca0.6Co0.4Cr0.6O3	14.1044
Ba0.4Ca0.6Co0.5Cr0.5O3	13.9505
Ba0.4Ca0.6Co0.6Cr0.4O3	13.809
Ba0.4Ca0.6Co0.7Cr0.3O3	13.6954
Ba0.4Ca0.6Co0.75Cr0.25O3	13.6529
Ba0.4Ca0.6Co0.8Cr0.2O3	13.6212
Ba0.4Ca0.6Co0.2Cu0.8O3	15.2869
Ba0.4Ca0.6Co0.25Cu0.75O3	15.2743
Ba0.4Ca0.6Co0.3Cu0.7O3	15.2401
Ba0.4Ca0.6Co0.4Cu0.6O3	15.1086
Ba0.4Ca0.6Co0.5Cu0.5O3	14.9067
Ba0.4Ca0.6Co0.6Cu0.4O3	14.6624
Ba0.4Ca0.6Co0.7Cu0.3O3	14.4117
Ba0.4Ca0.6Co0.75Cu0.25O3	14.2952
Ba0.4Ca0.6Co0.8Cu0.2O3	14.1899
Ba0.4Ca0.6Co0.2Fe0.8O3	14.7204
Ba0.4Ca0.6Co0.25Fe0.75O3	14.6913
Ba0.4Ca0.6Co0.3Fe0.7O3	14.6528
Ba0.4Ca0.6Co0.4Fe0.6O3	14.5499
Ba0.4Ca0.6Co0.5Fe0.5O3	14.4209
Ba0.4Ca0.6Co0.6Fe0.4O3	14.2793
Ba0.4Ca0.6Co0.7Fe0.3O3	14.141
Ba0.4Ca0.6Co0.2Ga0.8O3	14.5919
Ba0.4Ca0.6Co0.25Ga0.75O3	14.5678
Ba0.4Ca0.6Co0.3Ga0.7O3	14.5353
Ba0.4Ca0.6Co0.4Ga0.6O3	14.4478
Ba0.4Ca0.6Co0.5Ga0.5O3	14.3385
Ba0.4Ca0.6Co0.6Ga0.4O3	14.2203
Ba0.4Ca0.6Co0.7Ga0.3O3	14.1078
Ba0.4Ca0.6Co0.2Mg0.8O3	13.8384
Ba0.4Ca0.6Co0.25Mg0.75O3	13.8139
Ba0.4Ca0.6Co0.3Mg0.7O3	13.7889
Ba0.4Ca0.6Co0.4Mg0.6O3	13.7396
Ba0.4Ca0.6Co0.5Mg0.5O3	13.6947
Ba0.4Ca0.6Co0.6Mg0.4O3	13.6591
Ba0.4Ca0.6Co0.7Mg0.3O3	13.6372
Ba0.4Ca0.6Co0.75Mg0.25O3	13.6324
Ba0.4Ca0.6Co0.8Mg0.2O3	13.6321
Ba0.4Ca0.6Co0.2Mn0.8O3	13.8386
Ba0.4Ca0.6Co0.25Mn0.75O3	13.8233
Ba0.4Ca0.6Co0.3Mn0.7O3	13.8077
Ba0.4Ca0.6Co0.4Mn0.6O3	13.7767
Ba0.4Ca0.6Co0.5Mn0.5O3	13.7486
Ba0.4Ca0.6Co0.6Mn0.4O3	13.7271
Ba0.4Ca0.6Co0.7Mn0.3O3	13.7166
Ba0.4Ca0.6Co0.75Mn0.25O3	13.7167
Ba0.4Ca0.6Co0.8Mn0.2O3	13.7208
Ba0.4Ca0.6Co0.2Nb0.8O3	14.5379
Ba0.4Ca0.6Co0.25Nb0.75O3	14.5931
Ba0.4Ca0.6Co0.3Nb0.7O3	14.6431
Ba0.4Ca0.6Co0.4Nb0.6O3	14.7176
Ba0.4Ca0.6Co0.5Nb0.5O3	14.7465
Ba0.4Ca0.6Co0.6Nb0.4O3	14.7266
Ba0.4Ca0.6Co0.7Nb0.3O3	14.669
Ba0.4Ca0.6Co0.75Nb0.25O3	14.6323
Ba0.4Ca0.6Co0.8Nb0.2O3	14.5941
Ba0.4Ca0.6Co0.2Ni0.8O3	15.1027
Ba0.4Ca0.6Co0.25Ni0.75O3	15.042
Ba0.4Ca0.6Co0.3Ni0.7O3	14.9653
Ba0.4Ca0.6Co0.4Ni0.6O3	14.7707
Ba0.4Ca0.6Co0.5Ni0.5O3	14.5384
Ba0.4Ca0.6Co0.6Ni0.4O3	14.2946
Ba0.4Ca0.6Co0.75Ni0.25O3	13.9673
Ba0.4Ca0.6Co0.8Ni0.2O3	13.8802
Ba0.4Ca0.6Co0.2Sb0.8O3	14.1468
Ba0.4Ca0.6Co0.25Sb0.75O3	14.1853
Ba0.4Ca0.6Co0.3Sb0.7O3	14.2357
Ba0.4Ca0.6Co0.4Sb0.6O3	14.3748
Ba0.4Ca0.6Co0.5Sb0.5O3	14.5572
Ba0.4Ca0.6Co0.6Sb0.4O3	14.7556
Ba0.4Ca0.6Co0.7Sb0.3O3	14.9303
Ba0.4Ca0.6Co0.75Sb0.25O3	14.9964
Ba0.4Ca0.6Co0.8Sb0.2O3	15.0434
Ba0.4Ca0.6Co0.2Sn0.8O3	14.1798
Ba0.4Ca0.6Co0.25Sn0.75O3	14.2262
Ba0.4Ca0.6Co0.3Sn0.7O3	14.2835
Ba0.4Ca0.6Co0.4Sn0.6O3	14.4277
Ba0.4Ca0.6Co0.5Sn0.5O3	14.5921
Ba0.4Ca0.6Co0.6Sn0.4O3	14.7404
Ba0.4Ca0.6Co0.7Sn0.3O3	14.8367
Ba0.4Ca0.6Co0.75Sn0.25O3	14.859
Ba0.4Ca0.6Co0.8Sn0.2O3	14.8639
Ba0.4Ca0.6Co0.75Ta0.25O3	14.1386
Ba0.4Ca0.6Co0.8Ta0.2O3	14.2244
Ba0.4Ca0.6Co0.2Ti0.8O3	14.2721
Ba0.4Ca0.6Co0.25Ti0.75O3	14.2471
Ba0.4Ca0.6Co0.3Ti0.7O3	14.2185
Ba0.4Ca0.6Co0.4Ti0.6O3	14.1531
Ba0.4Ca0.6Co0.7Ti0.3O3	13.9599
Ba0.4Ca0.6Co0.75Ti0.25O3	13.9385
Ba0.4Ca0.6Co0.8Ti0.2O3	13.9223
Ba0.4Ca0.6Cr0.2Cu0.8O3	15.1485
Ba0.4Ca0.6Cr0.25Cu0.75O3	15.1038
Ba0.4Ca0.6Cr0.3Cu0.7O3	15.0334
Ba0.4Ca0.6Cr0.4Cu0.6O3	14.8186
Ba0.4Ca0.6Cr0.5Cu0.5O3	14.5211
Ba0.4Ca0.6Cr0.6Cu0.4O3	14.1743
Ba0.4Ca0.6Cr0.7Cu0.3O3	13.8224
Ba0.4Ca0.6Cr0.75Cu0.25O3	13.6591
Ba0.4Ca0.6Cr0.8Cu0.2O3	13.5112
Ba0.4Ca0.6Cr0.2Fe0.8O3	14.5756
Ba0.4Ca0.6Cr0.25Fe0.75O3	14.4969
Ba0.4Ca0.6Cr0.3Fe0.7O3	14.4057
Ba0.4Ca0.6Cr0.4Fe0.6O3	14.1915
Ba0.4Ca0.6Cr0.5Fe0.5O3	13.9486
Ba0.4Ca0.6Cr0.6Fe0.4O3	13.6978
Ba0.4Ca0.6Cr0.7Fe0.3O3	13.4623
Ba0.4Ca0.6Cr0.75Fe0.25O3	13.3573
Ba0.4Ca0.6Cr0.8Fe0.2O3	13.2641
Ba0.4Ca0.6Cr0.2Ga0.8O3	14.5107
Ba0.4Ca0.6Cr0.25Ga0.75O3	14.4559
Ba0.4Ca0.6Cr0.3Ga0.7O3	14.3895
Ba0.4Ca0.6Cr0.4Ga0.6O3	14.2266
Ba0.4Ca0.6Cr0.6Ga0.4O3	13.8328
Ba0.4Ca0.6Cr0.7Ga0.3O3	13.6416
Ba0.4Ca0.6Cr0.75Ga0.25O3	13.5565
Ba0.4Ca0.6Cr0.8Ga0.2O3	13.4813
[truncated: 148,452 more rows]
